# Supplementary material
Source: MDPI journal article supplement (https://www.mdpi.com/2073-4441/16/9/1210)
Supplement: s1 [file s1]

### Supplementary Materials 3- Tables with saturation index (SI) of water simulation

Table S45: SI>0 in the GRN Simulation. The numbers of simulations are referred to the sampling period and pe to the redox potential

| GRN        |      |      |                                |          |          |              |          |          |          |           |           |               |
|------------|------|------|--------------------------------|----------|----------|--------------|----------|----------|----------|-----------|-----------|---------------|
| Simulation | pH   | pe   | Al <sub>2</sub> O <sub>3</sub> | Boehmite | Diaspore | Ferrihydrite | Gibbsite | Goethite | Hematite | Kaolinite | Magnetite | Lepidocrocite |
| 12         | 6.4  | 0.88 | -                              | 0.90     | 2.60     | -            | 1.19     | 0.62     | 3.64     | 2.91      | 5.68      | -             |
| 13         | 7.08 | 0.39 | -                              | 0.65     | 2.35     | -            | 0.93     | 2.16     | 6.72     | 2.41      | 10.12     | 1.28          |
| 14         | 7.01 | 3.79 | -                              | 0.79     | 2.49     | 2.36         | 1.07     | 5.06     | 12.53    | 2.69      | 15.49     | 4.18          |
| 15         | 6.63 | 4.62 | -                              | 1.03     | 2.74     | 1.80         | 1.32     | 4.50     | 11.41    | 3.18      | 13.35     | 3.62          |
| 16         | 7.14 | 1.66 | -                              | 0.31     | 2.01     | -            | 0.59     | 2.13     | 6.66     | 1.73      | 8.69      | 1.25          |
| 17         | 6.6  | 3.33 | 0.25                           | 1.37     | 3.08     | 1.37         | 1.66     | 4.07     | 10.54    | 3.86      | 13.38     | 3.19          |
| 18         | 6.43 | 3.25 | -                              | 1.16     | 2.86     | 0.24         | 1.45     | 2.94     | 8.29     | 3.44      | 10.25     | 2.06          |
| 19         | 6.22 | 3.83 | -                              | 0.44     | 2.14     | 0.19         | 0.72     | 2.89     | 8.19     | 1.99      | 9.73      | 2.01          |

Table S46: SI>0 in SR10A Simulation. The numbers of simulations are referred to the sampling period and pe to the redox potential.

| SR10A      |      |      |                                |          |          |          |          |           |           |               |          |
|------------|------|------|--------------------------------|----------|----------|----------|----------|-----------|-----------|---------------|----------|
| Simulation | pH   | pe   | Al <sub>2</sub> O <sub>3</sub> | Boehmite | Diaspore | Gibbsite | Goethite | Kaolinite | Magnetite | Lepidocrocite | Hematite |
| 14         | 7.7  | 0.45 | -                              | 0.21     | 1.92     | 0.50     | 2.50     | 1.54      | 10.45     | 1.62          | 7.40     |
| 15         | 5.96 | 4.20 | 2.35                           | 1.23     | 2.93     | 1.51     | 1.76     | 3.57      | 6.22      | 0.88          | 5.92     |
| 16         | 6.09 | 4.93 | 0.57                           | 0.87     | 2.58     | 1.16     | 2.58     | 2.86      | 7.82      | 1.70          | 7.56     |
| 17         | 6.28 | 2.00 | -                              | 0.90     | 2.60     | 1.18     | -        | 2.91      | 2.41      | -             | 2.13     |
| 18         | 5.90 | 3.83 | -                              | 0.16     | 1.87     | 0.45     | 0.62     | 1.45      | 3.22      | -             | 3.63     |
| 19         | 6.29 | 3.33 | 0.27                           | 1.15     | 2.85     | 1.44     | 1.49     | 3.42      | 5.93      | 0.61          | 5.37     |
| 20         | 6.09 | 4.06 | 0.39                           | 0.92     | 2.62     | 1.21     | 1.14     | 2.96      | 4.35      | 0.26          | 4.67     |

Table S47:  $SI>0$  in S113 simulation. The numbers of simulations are referred to the sampling period and  $pe$  to the redox potential.

| S113       |      |      |         |              |          |          |          |          |          |           |               |           |                                |
|------------|------|------|---------|--------------|----------|----------|----------|----------|----------|-----------|---------------|-----------|--------------------------------|
| Simulation | pH   | pe   | Alunite | Ferrihydrite | Gibbsite | Goethite | Hematite | Diaspore | Boehmite | Magnetite | Lepidocrocite | Kaolinite | Al <sub>2</sub> O <sub>3</sub> |
| 19         | 6.2  | 0.49 | -       | -            | 0.86     | -        | -        | 2.28     | 0.57     | -         | -             | 2.27      | -                              |
| 20         | 5.53 | 4.30 | 0.31    | -            | 0.25     | 0.55     | 3.49     | 1.66     | -        | 2.91      | -             | 1.04      | -                              |
| 21         | 6.88 | 5.64 | 0.15    | 1.16         | 1.58     | 3.86     | 10.12    | 3.00     | 1.30     | 10.17     | 2.98          | 3.71      | 0.10                           |
| 22         | 7.3  | 5.62 | -       | 1.61         | 1.16     | 4.31     | 11.03    | 2.58     | 0.88     | 11.11     | 3.43          | 2.87      | -                              |
| 23         | 7.48 | 5.64 | -       | 1.73         | 0.89     | 4.43     | 11.26    | 2.30     | 0.60     | 11.27     | 3.55          | 2.31      | -                              |
| 24         | 6.84 | 5.76 | 0.21    | 0.70         | 1.56     | 3.40     | 9.21     | 2.98     | 1.27     | 8.71      | 2.52          | 3.66      | 0.05                           |
| 25         | 7.06 | 5.76 | -       | 1.16         | 1.38     | 3.86     | 10.13    | 2.80     | 1.09     | 9.87      | 2.98          | 3.30      | -                              |

Table S18:  $SI>0$  in SR8 simulation. The numbers of simulations are referred to the sampling period and  $pe$  to the redox potential.

| SR8        |      |      |         |          |          |          |              |          |          |           |               |           |          |                                |
|------------|------|------|---------|----------|----------|----------|--------------|----------|----------|-----------|---------------|-----------|----------|--------------------------------|
| Simulation | pH   | pe   | Calcite | Dolomite | Boehmite | Diaspore | Ferrihydrite | Gibbsite | Goethite | Magnetite | Lepidocrocite | Kaolinite | Hematite | Al <sub>2</sub> O <sub>3</sub> |
| 5          | 8.36 | 1.66 | 0.91    | 0.56     | -        | -        | -            | -        | -        | -         | -             | -         | -        | -                              |
| 8          | 7.71 | 1.06 | 0.34    | -        | -        | -        | -            | -        | -        | -         | -             | -         | -        | -                              |
| 10         | 8.43 | 1.66 | 0.54    | -        | -        | -        | -            | -        | -        | -         | -             | -         | -        | -                              |
| 11         | 7.32 | 0.17 | 0.08    | -        | -        | -        | -            | -        | -        | -         | -             | -         | -        | -                              |
| 14         | 7.83 | 0.45 | 0.48    | -        | 0.25     | 1.96     | 1.62         | 0.54     | 4.32     | 15.77     | 3.44          | 1.62      | 11.04    | -                              |
| 15         | 7.57 | 4.45 | 0.06    | -        | 0.87     | 2.57     | 2.20         | 1.16     | 4.90     | 13.77     | 4.02          | 2.85      | 12.19    | -                              |
| 16         | 7.06 | 2.54 | -       | -        | 0.76     | 2.46     | 0.71         | 1.05     | 3.41     | 11.72     | 2.53          | 2.63      | 9.21     | -                              |
| 17         | 6.76 | 1.66 | -       | -        | 1.33     | 3.03     | -            | 1.62     | 2.17     | 9.19      | 1.29          | 3.77      | 6.74     | 0.16                           |
| 18         | 7.2  | 2.74 | -       | -        | 1.14     | 2.84     | 2.19         | 1.42     | 4.89     | 15.82     | 4.01          | 3.39      | 12.18    | -                              |
| 19         | 7.02 | 3.18 | -       | -        | 1.09     | 2.79     | 0.50         | 1.37     | 3.20     | 10.48     | 2.32          | 3.29      | 8.79     | -                              |
| 20         | 6.63 | 3.64 | -       | -        | 1.20     | 2.90     | 0.30         | 1.49     | 3.00     | 9.83      | 2.12          | 3.52      | 8.40     | -                              |

Table S49:  $SI > 0$  in S2EST simulation. The numbers of simulations are referred to the sampling period and  $pe$  to the redox potential.

| S2EST      |      |     |         |          |                                |         |          |          |          |          |          |           |           |
|------------|------|-----|---------|----------|--------------------------------|---------|----------|----------|----------|----------|----------|-----------|-----------|
| Simulation | pH   | pe  | Calcite | Dolomite | Al <sub>2</sub> O <sub>3</sub> | Alunite | Boehmite | Diaspore | Gibbsite | Goethite | Hematite | Kaolinite | Magnetite |
| 10         | 9.97 | 2   | 0.78    | 0.45     | -                              | -       | -        | -        | -        | -        | -        | -         | -         |
| 18         | 5.36 | 0.5 | -       | -        | -                              | 3.19    | 0.47     | 2.17     | 0.75     | -        | -        | 2.05      | -         |
| 19         | 4.9  | 6.3 | -       | -        | -                              | 2.91    | -        | 1.62     | 0.20     | 0.30     | 3.00     | 0.95      | 0.78      |
| 20         | 4.9  | 5.3 | -       | -        | -                              | 0.16    | -        | 0.87     | -        | -        | 1.86     | -         | 0.03      |
| 21         | 5.57 | 2   | -       | -        | 0.66                           | 5.93    | 1.58     | 3.28     | 1.87     | -        | -        | 4.28      | -         |
| 22         | 5.46 | 4.4 | -       | -        | -                              | 4.31    | 1.02     | 2.72     | 1.31     | 0.22     | 2.84     | 3.16      | 1.90      |
| 23         | 5.49 | 5.5 | -       | -        | -                              | 4.10    | 0.93     | 2.63     | 1.22     | 1.39     | 5.19     | 2.98      | 4.27      |

Table S50:  $SI > 0$  in S1N simulation The numbers of simulations are referred to the sampling period and  $pe$  to the redox potential.

| S1N        |      |      |         |          |                                |         |          |          |              |          |          |          |           |           |               |                  |         |               |           |
|------------|------|------|---------|----------|--------------------------------|---------|----------|----------|--------------|----------|----------|----------|-----------|-----------|---------------|------------------|---------|---------------|-----------|
| Simulation | pH   | pe   | Calcite | Dolomite | Al <sub>2</sub> O <sub>3</sub> | Alunite | Boehmite | Diaspore | Ferrihydrite | Gibbsite | Goethite | Hematite | Kaolinite | Magnetite | Lepidocrocite | SbO <sub>2</sub> | Romeite | Schafarzikite | Tripuyite |
| 1          | 7.4  | 2.5  | -       | -        | -                              | -       | -        | -        | -            | -        | -        | -        | -         | -         | -             | 0.01             | -       | -             | -         |
| 3          | 7.2  | 1.7  | -       | -        | -                              | -       | -        | -        | -            | -        | -        | -        | -         | -         | -             | 1.45             | -       | -             | -         |
| 4          | 10.9 | 1.2  | 1.24    | 0.96     | -                              | -       | -        | -        | -            | -        | -        | -        | -         | -         | -             | -                | 1.44    | -             | -         |
| 5          | 7.9  | 1.7  | -       | -        | -                              | -       | -        | -        | -            | -        | -        | -        | -         | -         | -             | 0.29             | -       | -             | -         |
| 6          | 7.2  | 1.7  | -       | -        | -                              | -       | -        | -        | -            | -        | -        | -        | -         | -         | -             | 1.28             | -       | -             | -         |
| 7          | 7.0  | 1.7  | -       | -        | -                              | -       | -        | -        | -            | -        | -        | -        | -         | -         | -             | 1.78             | -       | -             | -         |
| 8          | 7.7  | 2.1  | -       | -        | -                              | -       | -        | -        | -            | -        | -        | -        | -         | -         | -             | 0.16             | -       | -             | -         |
| 9          | 8.7  | 1.6  | 0.71    | 0.13     | -                              | -       | -        | -        | -            | -        | -        | -        | -         | -         | -             | -                | -       | -             | -         |
| 11         | 7.0  | 1.7  | -       | -        | -                              | -       | -        | -        | -            | -        | -        | -        | -         | -         | -             | 1.25             | -       | -             | -         |
| 13         | 7.3  | 1.7  | -       | -        | -                              | -       | -        | -        | -            | -        | -        | -        | -         | -         | -             | 0.66             | -       | -             | -         |
| 14         | 9.4  | 1.0  | 1.30    | 0.97     | -                              | -       | -        | -        | -            | -        | -        | -        | -         | -         | -             | -                | -       | -             | -         |
| 15         | 6.6  | 1.5  | -       | -        | -                              | -       | -        | -        | -            | -        | -        | -        | -         | -         | -             | 2.12             | -       | -             | -         |
| 16         | 8.2  | 0.0  | 0.36    | -        | -                              | -       | -        | -        | -            | -        | -        | -        | -         | -         | -             | 1.02             | -       | -             | -         |
| 17         | 11.3 | -3.8 | 0.63    | 0.71     | -                              | -       | -        | -        | -            | -        | -        | -        | -         | -         | -             | -                | 1.69    | -             | -         |
| 18         | 10.9 | -3.5 | 0.94    | -        | -                              | -       | -        | -        | -            | -        | -        | -        | -         | -         | -             | -                | -       | -             | -         |
| 19         | 9.3  | 0.5  | 0.81    | -        | -                              | -       | -        | -        | -            | -        | -        | -        | -         | -         | -             | -                | -       | -             | -         |
| 20         | 7.0  | 0.5  | -       | -        | -                              | -       | 0.36     | 2.07     | -            | 0.65     | 0.74     | 3.87     | 1.84      | 5.87      |               | 1.62             | -       | 0.36          |           |
| 21         | 7.8  | 4.8  | -       | -        | 0.04                           | -       | 1.27     | 2.97     | 2.08         | 1.56     | 4.78     | 11.95    | 3.65      | 12.83     | 3.90          | -                | -       | -             | 0.79      |
| 22         | 7.5  | 4.6  | -       | -        | 0.21                           | -       | 1.36     | 3.06     | 1.76         | 1.64     | 4.46     | 11.31    | 3.83      | 12.30     | 3.58          | -                | -       | -             | 1.01      |
| 23         | 9.7  | 0.0  | 1.22    | 0.85     | -                              | -       | 0.59     | 2.29     | 1.88         | 0.87     | 4.58     | 11.56    | 1.83      | 15.19     | 3.70          | -                | -       | -             |           |
| 24         | 6.8  | 4.4  | -       | -        | 1.57                           | 0.40    | 2.03     | 3.74     | 2.24         | 2.32     | 4.94     | 12.28    | 5.19      | 14.66     | 4.06          | -                | -       | -             | 0.90      |
| 25         | 10.6 | 1.9  | 1.36    | 1.17     | -                              | -       | -        | 1.18     | 1.01         |          | 3.71     | 9.82     |           | 9.71      | 2.83          | -                | 0.71    | -             | -         |
| 26         | 6.9  | 3.9  | -       | -        | 0.09                           | 0.16    | 1.29     | 3.00     | 0.65         | 1.58     | 3.35     | 9.09     | 3.70      | 10.40     | 2.47          | 0.28             | -       | -             | 0.53      |

Table S51:  $SI > 0$  in S6N simulation The numbers of simulations are referred to the sampling period and  $pe$  to the redox potential.

| S6N        |     |      |         |                                |         |          |          |              |          |          |          |           |               |           |                  |               |           |
|------------|-----|------|---------|--------------------------------|---------|----------|----------|--------------|----------|----------|----------|-----------|---------------|-----------|------------------|---------------|-----------|
| Simulation | pH  | pe   | Calcite | Al <sub>2</sub> O <sub>3</sub> | Alunite | Boehmite | Diaspore | Ferrihydrite | Gibbsite | Goethite | Hematite | Kaolinite | Lepidocrocite | Magnetite | SbO <sub>2</sub> | Schafarzikite | Tripuyite |
| 1          | 7.7 | 2.0  | 0.26    | -                              | -       | -        | -        | -            | -        | -        | -        | -         | -             | -         | 0.52             | -             | -         |
| 2          | 7.3 | 2.0  | -       | -                              | -       | -        | -        | -            | -        | -        | -        | -         | -             | -         | 1.61             | -             | -         |
| 3          | 7.4 | 2.0  | -       | -                              | -       | -        | -        | -            | -        | -        | -        | -         | -             | -         | 1.33             | -             | -         |
| 4          | 8.5 | 2.5  | 0.86    | -                              | -       | -        | -        | -            | -        | -        | -        | -         | -             | -         | -                | -             | -         |
| 5          | 7.1 | 3.2  | -       | -                              | -       | -        | -        | -            | -        | -        | -        | -         | -             | -         | 0.98             | -             | -         |
| 6          | 7.8 | 2.0  | 0.36    | -                              | -       | -        | -        | -            | -        | -        | -        | -         | -             | -         | 0.65             | -             | -         |
| 7          | 6.5 | 2.0  | -       | -                              | -       | -        | -        | -            | -        | -        | -        | -         | -             | -         | 3.08             | -             | -         |
| 8          | 7.4 | 2.0  | -       | -                              | -       | -        | -        | -            | -        | -        | -        | -         | -             | -         | 1.02             | -             | -         |
| 9          | 7.8 | 2.3  | 0.56    | -                              | -       | -        | -        | -            | -        | -        | -        | -         | -             | -         | 0.38             | -             | -         |
| 10         | 8.6 | 2.8  | 0.96    | -                              | -       | -        | -        | -            | -        | -        | -        | -         | -             | -         | -                | -             | -         |
| 11         | 8.2 | 2.0  | 0.86    | -                              | -       | -        | -        | -            | -        | -        | -        | -         | -             | -         | -                | -             | -         |
| 12         | 7.3 | -0.3 | -       | -                              | -       | -        | -        | -            | -        | -        | -        | -         | -             | -         | 3.45             | -             | -         |
| 13         | 8.7 | -1.5 | 0.93    | -                              | -       | -        | -        | -            | -        | -        | -        | -         | -             | -         | 2.05             | -             | -         |
| 14         | 7.8 | 0.7  | 0.30    | -                              | -       | -        | -        | -            | -        | -        | -        | -         | -             | -         | 1.75             | -             | -         |
| 15         | 7.0 | 0.5  | -       | -                              | -       | 0.68     | 2.38     | -            | 0.96     | 2.48     | 7.36     | 2.48      | 1.60          | 11.05     | 3.04             | 4.77          | -         |
| 16         | 7.3 | 5.0  | -       | -                              | -       | 0.66     | 2.37     | 1.37         | 0.95     | 4.07     | 10.54    | 2.45      | 3.19          | 11.05     | -                | -             | 1.00      |
| 17         | 6.8 | 4.3  | -       | -                              | 0.33    | 0.87     | 2.57     | 1.65         | 1.16     | 4.35     | 11.10    | 2.86      | 3.47          | 12.97     | -                | -             | 1.50      |
| 18         | 7.4 | 2.0  | 0.21    | -                              | -       | 0.30     | 2.00     | 1.41         | 0.59     | 4.11     | 10.61    | 1.71      | 3.23          | 13.99     | 1.07             | -             | 0.77      |
| 19         | 6.9 | 4.6  | -       | 0.20                           | -       | 1.35     | 3.05     | 1.44         | 1.63     | 4.14     | 10.68    | 3.81      | 3.26          | 12.04     | -                | -             | 1.42      |
| 20         | 7.7 | 2.7  | 0.24    | -                              | -       | 0.34     | 2.05     | 1.63         | 0.63     | 4.34     | 11.07    | 1.80      | 3.46          | 13.70     | -                | -             | 0.89      |
| 21         | 6.7 | 3.8  | -       | -                              | 1.09    | 1.01     | 2.72     | 1.28         | 1.30     | 3.98     | 10.37    | 3.15      | 3.10          | 12.54     | 0.64             | -             | 1.31      |

Table S52:  $SI > 0$  in S118 simulation. The numbers of simulations are referred to the sampling period and  $pe$  to the redox potential.

| S118       |     |     |         |                                |          |          |              |          |          |          |           |           |               |                  |               |           |
|------------|-----|-----|---------|--------------------------------|----------|----------|--------------|----------|----------|----------|-----------|-----------|---------------|------------------|---------------|-----------|
| Simulation | pH  | pe  | Alunite | Al <sub>2</sub> O <sub>3</sub> | Boehmite | Diaspore | Ferrihydrite | Gibbsite | Goethite | Hematite | Magnetite | Kaolinite | Lepidocrocite | SbO <sub>2</sub> | Schafarzikite | Tripuyite |
| 1          | 6.7 | 1.7 | -       | -                              | -        | -        | -            | -        | -        | -        | -         | -         | -             | 1.24             | -             | -         |
| 2          | 6.5 | 1.7 | -       | -                              | -        | -        | -            | -        | -        | -        | -         | -         | -             | 1.07             | -             | -         |
| 3          | 6.2 | 1.7 | -       | -                              | -        | -        | -            | -        | -        | -        | -         | -         | -             | 1.85             | -             | -         |
| 4          | 6.5 | 2.9 | -       | -                              | -        | -        | -            | -        | -        | -        | -         | -         | -             | -                | -             | -         |
| 5          | 6.0 | 1.7 | -       | -                              | -        | -        | -            | -        | -        | -        | -         | -         | -             | 0.62             | -             | -         |
| 6          | 6.4 | 1.7 | -       | -                              | -        | -        | -            | -        | -        | -        | -         | -         | -             | 2.43             | -             | -         |
| 7          | 6.9 | 1.7 | -       | -                              | -        | -        | -            | -        | -        | -        | -         | -         | -             | 0.58             | -             | -         |
| 8          | 6.7 | 1.9 | -       | -                              | -        | -        | -            | -        | -        | -        | -         | -         | -             | 1.31             | -             | -         |
| 9          | 5.9 | 2.5 | -       | -                              | -        | -        | -            | -        | -        | -        | -         | -         | -             | 2.14             | -             | -         |
| 10         | 7.9 | 1.7 | -       | -                              | -        | -        | -            | -        | -        | -        | -         | -         | -             | -                | -             | -         |
| 11         | 7.3 | 0.9 | -       | -                              | -        | -        | -            | -        | -        | -        | -         | -         | -             | 1.61             | -             | -         |
| 12         | 6.0 | 1.0 | -       | -                              | -        | -        | -            | -        | -        | -        | -         | -         | -             | 2.04             | -             | -         |
| 13         | 5.7 | 0.6 | -       | -                              | -        | -        | -            | -        | -        | -        | -         | -         | -             | 1.20             | -             | -         |
| 14         | 7.2 | 0.5 | -       | -                              | 0.21     | 1.92     | -            | 0.50     | 2.03     | 6.46     | 9.45      | 1.54      | 1.15          | 1.38             | 0.27          | -         |
| 15         | 6.1 | 4.9 | 1.36    | -                              | 0.64     | 2.34     | -            | 0.92     | 2.28     | 6.97     | 7.00      | 2.39      | 1.40          | 0.31             | -             | -         |
| 16         | 6.4 | 3.9 | 2.16    | -                              | 1.24     | 2.95     | 0.01         | 1.53     | 2.71     | 7.82     | 8.92      | 3.60      | 1.83          | 0.79             | -             | -         |
| 17         | 7.6 | 1.7 | -       | -                              | 0.45     | 2.16     | 1.21         | 0.74     | 3.91     | 10.21    | 13.60     | 2.02      | 3.03          | 1.18             | -             | 0.47      |
| 18         | 6.7 | 3.4 | 1.41    | -                              | 1.15     | 2.85     | 0.84         | 1.44     | 3.54     | 9.49     | 11.63     | 3.42      | 2.66          | 0.86             | -             | 0.68      |
| 19         | 6.6 | 4.9 | 1.62    | 1.15                           | 1.82     | 3.53     | 1.73         | 2.11     | 4.43     | 11.25    | 12.89     | 4.77      | 3.55          | -                | -             | 1.94      |
| 20         | 6.1 | 4.6 | 1.72    | -                              | 0.94     | 2.65     | -            | 1.23     | 2.27     | 6.93     | 7.18      | 3.00      | 1.39          | 1.01             | -             | 0.16      |
