# Supplementary material
Source: MDPI journal article supplement (https://www.mdpi.com/2073-4441/16/9/1210)
Supplement: s1 [file s1]

**Supplementary Materials S1- Temporal variability of the physicochemical parameters and concentrations of the main solutes of the piezometer, surface and spring waters.**

*Table S1: Piezometer S1N. Month and year of sampling, Temperature (T) in °C, pH values, Electrical Conductivity (E.C.) in  $\mu\text{S}/\text{cm}$ , redox potential (Eh) in mV, Hydraulic Head (H.I.) in m above topographic field level (t.f.l), and concentrations of main cations and anions ( $\text{mg}\cdot\text{L}^{-1}$ ). Electroneutrality parameter in %; n.d. not determined.*

| ID  | Month-year | T    | pH    | E.C. | Eh   | H.I. | $\text{HCO}_3^-$ | F    | Cl   | $\text{Br}^-$ | $\text{NO}_3^-$ | $\text{SO}_4^{2-}$ | $\text{Ca}^{2+}$ | $\text{Mg}^{2+}$ | $\text{Na}^+$ | $\text{K}^+$ | $\text{NH}_4^+$ | Error % |
|-----|------------|------|-------|------|------|------|------------------|------|------|---------------|-----------------|--------------------|------------------|------------------|---------------|--------------|-----------------|---------|
| S1N | Feb-13     | 12   | 7.38  | 180  | 149  | 4.75 | 65               | 0.2  | 5.6  | <0.1          | 1.8             | 18                 | 15               | 2                | 7             | 10           | 0.03            | -4.14   |
| S1N | May-13     | 13   | 7.66  | 350  | 200  | 4.10 | 110              | 0.4  | 8.9  | <0.1          | 7.4             | 48                 | 45               | 3                | 8             | 8            | <0.01           | -2.72   |
| S1N | Sep-13     | 13   | 7.23  | 610  | n.d. | 5.32 | 142              | 0.1  | 15.0 | <0.1          | 0.9             | 160                | 82               | 12               | 14            | 17           | 0.10            | 0.30    |
| S1N | Jan-14     | 11   | 10.87 | 380  | 70   | 5.25 | 111              | 0.3  | 9.2  | <0.1          | 2.8             | 58                 | 16               | 1                | 24            | 43           | 0.14            | -4.81   |
| S1N | May-14     | 14   | 7.88  | 320  | n.d. | 4.22 | 96               | 0.3  | 5.8  | <0.1          | 2.1             | 55                 | 28               | 2                | 14            | 23           | 0.12            | -2.89   |
| S1N | Sep-14     | 14   | 7.24  | 670  | n.d. | 4.80 | 152              | 0.4  | 7.6  | <0.1          | <0.1            | 106                | 54               | 4                | 27            | 33           | <0.01           | 0.99    |
| S1N | Jan-15     | n.d. | n.d.  | n.d. | n.d. | 4.30 | 31               | 0.4  | 9.9  | <0.1          | 3.6             | 56                 | 30               | 1                | 27            | 52           | 0.12            | 3.28    |
| S1N | May-15     | 13   | 7.66  | 169  | 123  | 4.05 | 88               | 0.5  | 5.5  | <0.1          | 2.6             | 16                 | 29               | 1                | 4             | 8            | 0.19            | -1.04   |
| S1N | Sep-15     | 16   | 8.74  | 200  | 94   | 4.92 | 120              | 0.1  | 6.4  | <0.1          | 1.2             | 27                 | 23               | 2                | 15            | 35           | 0.23            | 2.82    |
| S1N | Jan-17     | 12   | 7.75  | 540  | n.d. | 5.47 | 113              | 0.3  | 26.6 | <0.1          | 3.3             | 26                 | 40               | 4                | 20            | 12           | 0.15            | 4.19    |
| S1N | Jun-18     | 14   | 6.99  | 1093 | n.d. | 4.68 | 83               | 0.3  | 3.7  | <0.1          | 5.5             | 31                 | 27               | 1                | 13            | 32           | 0.01            | 1.24    |
| S1N | Mar-19     | 13   | 7.49  | 226  | n.d. | 4.65 | 62               | <0.1 | 2.4  | <0.1          | 2.9             | 14                 | 24               | 1                | 5             | 5            | 0.03            | 7.98    |
| S1N | May-19     | 14   | 7.25  | 211  | n.d. | 4.50 | 62               | 0.1  | 28.5 | 1.9           | 1.8             | 52                 | 24               | 1                | 5             | 5            | 0.03            | -2.75   |
| S1N | Oct-19     | 13   | 9.39  | 194  | 58   | 5.25 | 129              | 0.3  | 6.4  | 0.9           | 15.8            | 38                 | 29               | 1                | 17            | 40           | 0.14            | -0.88   |
| S1N | Jan-20     | 12   | 6.62  | 230  | 86   | 3.93 | 90               | 0.3  | 15.6 | <0.1          | 2.9             | 36                 | 26               | 1                | 18            | 29           | 0.04            | 2.43    |
| S1N | May-20     | 14   | 8.15  | 321  | n.d. | 4.49 | 106              | 0.1  | 11.2 | <0.1          | 4.7             | 25                 | 42               | 2                | 7             | 8            | 0.19            | 3.29    |
| S1N | Oct-20     | 13   | 11.26 | 387  | -226 | n.d. | 151              | 0.5  | 12.5 | 0.3           | 3.2             | 32                 | 33               | 22               | 46            | 0            | 0.10            | 2.11    |
| S1N | Jan-21     | 13   | 10.94 | 192  | -209 | 3.95 | 79               | 0.1  | 3.2  | <0.1          | 1.0             | 6                  | 16               | 1                | 8             | 14           | 0.03            | 0.31    |
| S1N | Apr-21     | 12   | 9.30  | 207  | 29   | 4.25 | 44               | <0.1 | 48.2 | 0.6           | 6.3             | 14                 | 27               | 1                | 10            | 17           | 0.16            | -3.50   |
| S1N | Sep-21     | 14   | 6.97  | 552  | 28   | 5.5  | 150              | 0.2  | 9.2  | 0.3           | 7.2             | 136                | 130              | 17               | 9             | 10           | 0.05            | 2.01    |
| S1N | Jan-22     | 13   | 7.80  | 122  | 283  | 5.15 | 63               | <0.1 | 6.4  | <0.1          | 2.6             | 12                 | 21               | 1                | 4             | 5            | 0.20            | -1.41   |
| S1N | May-22     | 14   | 7.54  | 231  | 273  | 5.63 | 96               | 0.2  | 7.1  | <0.1          | 5.3             | 24                 | 27               | 1                | 9             | 13           | 0.14            | -3.84   |
| S1N | Sep-22     | 14   | 9.65  | 399  | n.d. | 6.47 | 137              | 0.3  | 6.4  | 0.5           | 6.6             | 59                 | 21               | 1                | 23            | 55           | 0.02            | -3.67   |
| S1N | Jan-23     | 11   | 6.84  | 149  | 261  | 4.98 | 38               | <0.1 | 4.8  | 0.2           | 0.9             | 14                 | 15               | 1                | 3             | 2            | 0.06            | -2.04   |
| S1N | Jun-23     | 14   | 10.60 | 249  | 113  | 4.70 | 99               | 0.2  | 4.6  | <0.1          | 2.5             | 22                 | 30               | 1                | 9             | 2            | 0.18            | -3.69   |
| S1N | Sep-23     | 14   | 6.89  | 404  | 227  | 5.70 | 119              | 0.1  | 3.9  | <0.1          | 3.8             | 63                 | 52               | 2                | 13            | 16           | 0.03            | 4.63    |

Table S2: Piezometer S6N. Month and year of sampling, Temperature (T) in °C, pH values, Electrical Conductivity (E.C.) in  $\mu\text{S}/\text{cm}$ , redox potential (Eh) in mV, Hydraulic Head (H.I.) in m t.f.l., and concentrations of main cations and anions ( $\text{mg}\cdot\text{L}^{-1}$ ). Electroneutrality parameter in %; n.d. not determined.

| ID  | Month-year | T  | pH   | E.C. | Eh   | H.I. | $\text{HCO}_3^-$ | F <sup>-</sup> | $\text{Cl}^-$ | $\text{Br}^-$ | $\text{NO}_3^-$ | $\text{SO}_4^{2-}$ | $\text{Ca}^{2+}$ | $\text{Mg}^{2+}$ | $\text{Na}^+$ | $\text{K}^+$ | $\text{NH}_4^+$ | Error % |
|-----|------------|----|------|------|------|------|------------------|----------------|---------------|---------------|-----------------|--------------------|------------------|------------------|---------------|--------------|-----------------|---------|
| S6N | Feb-13     | 12 | 8.97 | 290  | 165  | 5.60 | 80               | 1.6            | 8.3           | 0.4           | 0.6             | 46                 | 31               | <0.1             | 9             | 20           | 0.20            | -2.93   |
| S6N | May-13     | 13 | 9.55 | 250  | 145  | 6.45 | 85               | 1.1            | 6.5           | 0.2           | 2.8             | 39                 | 26               | 1                | 9             | 22           | n.d.            | -4.51   |
| S6N | Sep-13     | 13 | 6.23 | 510  | n.d. | 8.45 | 179              | 0.5            | 7.1           | <0.1          | 7.1             | 120                | 77               | 2                | 16            | 39           | n.d.            | -0.70   |
| S6N | Jan-14     | 12 | 6.23 | 230  | 156  | 6.48 | 90               | 0.6            | 4.1           | <0.1          | 0.9             | 19                 | 26               | <0.1             | 7             | 16           | 0.50            | 0.69    |
| S6N | May-14     | 14 | 7.72 | 870  | n.d. | 6.59 | 102              | 0.6            | 7.0           | <0.1          | 1.6             | 366                | 145              | 6                | 13            | 33           | 0.10            | -2.21   |
| S6N | Sep-14     | 13 | 7.28 | 768  | n.d. | 8.14 | 168              | 0.6            | 7.7           | <0.1          | 4.1             | 168                | 92               | 3                | 15            | 34           | n.d.            | -1.64   |
| S6N | Jan-15     | 10 | 7.42 | n.d. | n.d. | 7.45 | 108              | 1.0            | 7.6           | <0.1          | 0.9             | 50                 | 39               | <0.1             | 10            | 23           | 0.10            | -1.81   |
| S6N | May-15     | 14 | 8.48 | 302  | 149  | 7.36 | 141              | 0.9            | 5.3           | <0.1          | 2.3             | 48                 | 52               | <0.1             | 10            | 21           | 0.10            | 1.49    |
| S6N | Sep-15     | 14 | 7.08 | 400  | 188  | 7.82 | 227              | 0.5            | 5.3           | <0.1          | 5.9             | 83                 | 88               | 1                | 11            | 32           | 0.10            | 1.10    |
| S6N | Jan-17     | 11 | 7.76 | 410  | n.d. | 8.82 | 178              | 0.5            | 5.0           | <0.1          | 2.0             | 39                 | 65               | 1                | 7             | 20           | 0.50            | 3.03    |
| S6N | Jun-18     | 14 | 6.50 | 690  | n.d. | 6.75 | 182              | 0.6            | 4.8           | <0.1          | 5.4             | 48                 | 65               | 1                | 8             | 18           | 0.40            | -0.67   |
| S6N | Mar-19     | 13 | 7.42 | 536  | n.d. | 7.52 | 123              | 0.8            | 3.6           | <0.1          | 1.4             | 163                | 91               | 3                | 7             | 20           | 0.10            | 0.33    |
| S6N | Oct-19     | 12 | 7.76 | 301  | 134  | 7.76 | 226              | 1.0            | 8.1           | <0.1          | 7.8             | 96                 | 93               | 2                | 8             | 22           | <0.01           | -3.44   |
| S6N | Jan-20     | 12 | 8.56 | 220  | 165  | 7.01 | 128              | 0.9            | 47.4          | 1.2           | 2.0             | 57                 | 65               | 1                | 18            | 14           | 0.10            | -2.82   |
| S6N | May-20     | 14 | 8.22 | 572  | n.d. | 7.73 | 173              | 0.9            | 11.4          | <0.1          | 4.7             | 84                 | 84               | 2                | 7             | 16           | <0.01           | -0.10   |
| S6N | Oct-20     | 13 | 7.32 | 398  | -16  | 6.70 | 163              | 0.5            | 10.6          | 0.6           | 1.4             | 46                 | 59               | 1                | 6             | 17           | 0.10            | -3.12   |
| S6N | Jan-21     | 12 | 8.69 | 251  | -86  | 6.35 | 124              | 0.5            | 3.8           | 0.6           | 1.1             | 20                 | 42               | <0.1             | 5             | 9            | 0.10            | -1.13   |
| S6N | Apr-21     | 13 | 7.80 | 356  | 40   | n.d. | 160              | 0.4            | 3.8           | 0.6           | 5.0             | 24                 | 55               | 1                | 0             | 12           | 0.2             | -1.65   |
| S6N | Sep-21     | 13 | 6.99 | 1150 | 30   | 8.58 | 162              | 0.3            | 17.3          | <0.1          | 1.3             | 511                | 259              | 10               | 13            | 26           | <0.01           | 4.11    |
| S6N | Jan-22     | 12 | 7.29 | 452  | 293  | 7.65 | 167              | 0.5            | 6.2           | <0.1          | 2.8             | 89                 | 79               | 2                | 8             | 16           | 0.10            | 0.61    |
| S6N | May-22     | 14 | 6.84 | 947  | 256  | 8.39 | 153              | 0.5            | 8.9           | <0.1          | 1.8             | 334                | 164              | 8                | 10            | 21           | 0.10            | 0.27    |
| S6N | Sep-22     | 13 | 7.43 | 912  | n.d. | 7.40 | 157              | 0.4            | 5.5           | 0.5           | 2.9             | 339                | 159              | 7                | 11            | 21           | 0.10            | -1.34   |
| S6N | Jan-23     | 12 | 6.92 | 274  | 269  | 5.50 | 132              | 0.5            | 5.4           | 0.6           | 1.5             | 22                 | 44               | 1                | 4             | 11           | 0.10            | -1.51   |
| S6N | Jun-23     | 13 | 7.73 | 351  | 158  | 5.18 | 179              | 0.5            | 2.5           | <0.1          | 2.1             | 20                 | 51               | 4                | 4             | 11           | <0.01           | -2.36   |
| S6N | Sep-23     | 14 | 6.68 | 885  | 226  | 8.71 | 143              | 0.2            | 1.4           | <0.1          | 0.3             | 296                | 157              | 7                | 10            | 18           | <0.01           | 4.13    |

Table S3: Piezometer S2Est. Month and year of sampling, Temperature (T) in °C, pH values, Electrical Conductivity (E.C.) in  $\mu\text{S/cm}$ , redox potential (Eh) in mV, Hydraulic Head (H.I.) in m t.f.l., and concentrations of main cations and anions ( $\text{mg}\cdot\text{L}^{-1}$ ). Electroneutrality parameter in %; n.d. not determined.

| ID      | Month-year | T    | pH   | E.C. | Eh   | H.I. | $\text{HCO}_3^-$ | F <sup>-</sup> | $\text{Cl}^-$ | $\text{Br}^-$ | $\text{NO}_3^-$ | $\text{SO}_4^{2-}$ | $\text{Ca}^{2+}$ | $\text{Mg}^{2+}$ | $\text{Na}^+$ | $\text{K}^+$ | $\text{NH}_4^+$ | Error % |
|---------|------------|------|------|------|------|------|------------------|----------------|---------------|---------------|-----------------|--------------------|------------------|------------------|---------------|--------------|-----------------|---------|
| S2 est. | Feb-13     | 13   | 4.87 | 550  | 280  | 5.09 | 1                | 2.0            | 25.2          | 0.4           | 39.1            | 234                | 74               | 5                | 30            | 15           | 0.09            | -3.99   |
| S2 est. | May-13     | 13   | 5.69 | 340  | 219  | 4.35 | 16               | 1.5            | 10.9          | <0.1          | 19.4            | 272                | 96               | 10               | 13            | 13           | <0.01           | -0.78   |
| S2 est. | Sep-13     | 14   | 5.83 | 720  | n.d. | 5.57 | 17               | 1.1            | 10.0          | <0.1          | 13.0            | 314                | 105              | 13               | 15            | 12           | 1.10            | 0.05    |
| S2 est. | Jan-14     | n.d. | n.d. | n.d. | n.d. | 5.60 | 8                | 1.2            | 9.9           | <0.1          | 19.4            | 371                | 126              | 22               | 17            | 16           | 0.12            | 4.07    |
| S2 est. | Sep-14     | 14   | 7.52 | 335  | n.d. | 5.05 | 15               | 0.7            | 5.9           | <0.1          | 11.8            | 214                | 70               | 8                | 13            | 9            | <0.01           | 0.56    |
| S2 est. | Jan-15     | 13   | 5.12 | n.d. | n.d. | 4.62 | 44               | 0.5            | 6.6           | <0.1          | 8.0             | 138                | 61               | 4                | 13            | 14           | 0.13            | 4.47    |
| S2 est. | May-15     | 13   | 4.88 | 667  | 318  | 4.37 | 5                | 0.6            | 14.9          | <0.1          | 9.8             | 367                | 113              | 16               | 15            | 12           | 0.09            | -2.70   |
| S2 est. | Sep-15     | 13   | 5.28 | 660  | 291  | 5.23 | 16               | 0.4            | 11.6          | <0.1          | 10.5            | 450                | 124              | 27               | 14            | 16           | 0.08            | -3.54   |
| S2 est. | Jan-17     | 12   | 5.21 | 771  | n.d. | 5.71 | 42               | 0.2            | 8.7           | <0.1          | 10.0            | 247                | 98               | 13               | 11            | 9            | 0.06            | 3.62    |
| S2 est. | Jun-18     | 14   | 9.97 | 340  | n.d. | 4.96 | 17               | 1.1            | 20.9          | <0.1          | 13.7            | 269                | 96               | 11               | 12            | 11           | <0.01           | -1.73   |
| S2 est. | Mar-19     | 13   | 6.80 | 603  | n.d. | 4.93 | 25               | 0.3            | 5.7           | <0.1          | 7.6             | 196                | 68               | 9                | 11            | 9            | 0.02            | 0.85    |
| S2 est. | Oct-19     | 14   | 5.80 | 355  | 201  | 5.52 | 12               | 0.4            | 8.5           | <0.1          | 9.6             | 272                | 102              | 12               | 15            | 9            | 0.02            | 4.91    |
| S2 est. | Jan-20     | 12   | 6.19 | 738  | 174  | 4.27 | 21               | 1.4            | 27.1          | <0.1          | 6.0             | 181                | 70               | 9                | 12            | 8            | 0.04            | -0.33   |
| S2 est. | May-20     | 14   | 7.15 | 765  | n.d. | 4.75 | 12               | <0.1           | 23.4          | 0.8           | 11.6            | 332                | 120              | 15               | 15            | 11           | 0.01            | 1.28    |
| S2 est. | Oct-20     | 12   | 7.08 | 286  | -15  | 5.45 | 62               | 0.3            | 10.7          | 0.5           | 3.1             | 44                 | 31               | 2                | 7             | 5            | 0.06            | -2.19   |
| S2 est. | Jan-21     | 13   | 6.85 | 333  | 13   | 4.25 | 43               | 0.3            | 8.8           | 0.3           | 8.7             | 97                 | 45               | 6                | 9             | 8            | 0.01            | 3.05    |
| S2 est. | Apr-21     | 13   | 5.50 | 661  | 38   | 4.56 | 28               | <0.1           | 9.1           | 0.7           | 6.2             | 223                | 84               | 11               | 12            | 8            | 0.05            | 3.63    |
| S2 est. | Sep-21     | 13   | 5.36 | 424  | 28   | 5.80 | 20               | 0.4            | 10.9          | 0.1           | 9.9             | 360                | 120              | 14               | 13            | 11           | 0.21            | -1.73   |
| S2 est. | Jan-22     | 13   | 4.90 | 702  | 373  | 5.45 | 20               | 0.3            | 9.8           | <0.1          | 15.4            | 289                | 103              | 13               | 13            | 10           | 0.04            | 0.91    |
| S2 est. | May-22     | 14   | 4.90 | 643  | 316  | 5.93 | 38               | 0.1            | 9.9           | 0.3           | 15.1            | 149                | 59               | 6                | 10            | 9            | 0.09            | -1.59   |
| S2 est. | Sep-22     | 13   | 5.57 | 358  | n.d. | 6.80 | 17               | <0.1           | 10.3          | 0.3           | 12.2            | 289                | 101              | 13               | 12            | 10           | <0.01           | 0.62    |
| S2 est. | Jan-23     | 12   | 5.46 | 581  | 260  | 5.38 | 26               | 0.1            | 8.1           | 0.5           | 10.0            | 225                | 81               | 10               | 10            | 8            | 0.03            | -0.23   |
| S2 est. | Sep-23     | 14   | 5.49 | 565  | 326  | 6.10 | 27               | <0.1           | 10.1          | <0.1          | 8.8             | 259                | 83               | 11               | 12            | 9            | 0.01            | -4.44   |

Table S4: Piezometer S42. Month and year of sampling, Temperature (T) in °C, pH values, Electrical Conductivity (E.C.) in  $\mu\text{S/cm}$ , redox potential (Eh) in mV, Hydraulic Head (H.I.) in m t.f.l., and concentrations of main cations and anions ( $\text{mg}\cdot\text{L}^{-1}$ ). Electroneutrality parameter in %; n.d. not determined.

| ID  | Month-Year | T  | pH   | E.C. | Eh   | H.I.  | $\text{HCO}_3^-$ | $\text{F}^-$ | $\text{Cl}^-$ | $\text{Br}^-$ | $\text{NO}_3^-$ | $\text{SO}_4^{2-}$ | $\text{Ca}^{2+}$ | $\text{Mg}^{2+}$ | $\text{Na}^+$ | $\text{K}^+$ | $\text{NH}_4^+$ | Error % |
|-----|------------|----|------|------|------|-------|------------------|--------------|---------------|---------------|-----------------|--------------------|------------------|------------------|---------------|--------------|-----------------|---------|
| S42 | May-13     | 11 | 6.89 | 660  | 267  | 3.38  | 83               | 0.2          | 8.8           | <0.1          | 20.3            | 234                | 104              | 8                | 10            | 15           | 0.90            | -0.80   |
| S42 | Sep-13     | 13 | 6.62 | 630  | n.d. | 4.72  | 51               | 0.1          | 9.0           | <0.1          | 20.0            | 202                | 85               | 7                | 10            | 16           | <0.01           | 0.55    |
| S42 | Jan-14     | 11 | 6.77 | 590  | 250  | 4.70  | 173              | 0.1          | 9.0           | <0.1          | 10.1            | 138                | 95               | 8                | 6             | 14           | 0.03            | -0.98   |
| S42 | May-14     | 12 | 6.75 | 540  | n.d. | 3.56  | 49               | <0.1         | 9.4           | <0.1          | 16.3            | 169                | 62               | 7                | 10            | 17           | 0.15            | -2.55   |
| S42 | Sep-14     | 13 | 6.75 | 530  | n.d. | 4.13  | 59               | 0.4          | 9.8           | <0.1          | 15.2            | 162                | 66               | 6                | 11            | 13           | <0.01           | -3.11   |
| S42 | May-15     | 12 | 7.28 | n.d. | n.d. | 3.71  | 64               | 0.4          | 9.3           | <0.1          | 17.3            | 164                | 70               | 6                | 11            | 14           | 0.08            | -1.92   |
| S42 | May-15     | 11 | 6.42 | 456  | 120  | 3.41  | 63               | 0.2          | 9.4           | <0.1          | 17.0            | 191                | 79               | 7                | 11            | 14           | 0.08            | -1.70   |
| S42 | Sep-15     | 13 | 6.46 | 280  | 203  | 4.28  | 195              | <0.1         | 5.0           | <0.1          | 4.0             | 23                 | 73               | 3                | 4             | 8            | 0.13            | 4.72    |
| S42 | Jan-18     | 10 | 6.38 | 523  | n.d. | 15.31 | 109              | <0.1         | 7.9           | 0.8           | 13.3            | 161                | 92               | 8                | 10            | 16           | 0.03            | 4.64    |
| S42 | Jun-18     | 14 | 7.62 | 450  | n.d. | 3.98  | 94               | 0.2          | 8.3           | 0.5           | 18.2            | 181                | 82               | 7                | 9             | 12           | 0.41            | -4.58   |
| S42 | Mar-19     | 12 | 6.94 | 565  | n.d. | 6.01  | 70               | 0.1          | 6.9           | <0.1          | 14.9            | 204                | 82               | 8                | 9             | 13           | 0.02            | -3.15   |
| S42 | Oct-19     | 14 | 7.22 | 291  | 28   | 4.59  | 177              | 0.2          | 3.3           | 0.1           | 8.0             | 59                 | 80               | 3                | 7             | 7            | 0.03            | 3.66    |
| S42 | Jan-20     | 11 | 5.72 | 375  | 151  | 3.28  | 112              | 0.2          | 13.6          | <0.1          | 13.7            | 179                | 103              | 8                | 12            | 14           | 0.05            | 3.89    |
| S42 | May-20     | 13 | 7.61 | 608  | n.d. | 3.9   | 63               | 0.5          | 12.2          | <0.1          | 13.1            | 174                | 85               | 8                | 10            | 16           | 0.01            | 4.34    |
| S42 | Oct-20     | 13 | 7.32 | 540  | 23   | 4.55  | 244              | 0.6          | 11.1          | 0.4           | 12.0            | 63                 | 94               | 6                | 5             | 9            | 0.06            | -1.45   |
| S42 | Jan-21     | 11 | 6.56 | 553  | 30   | 3.4   | 112              | 0.3          | 6.2           | 0.8           | 13.8            | 144                | 8                | 8                | 91            | 12           | <0.01           | 0.54    |
| S42 | Apr-21     | 12 | 6.30 | 550  | 37   | 4.28  | 93               | <0.1         | 4.0           | 0.6           | 11.6            | 121                | 71               | 5                | 8             | 13           | 0.01            | 3.79    |
| S42 | Sep-21     | 12 | 6.60 | 558  | 28   | 5.48  | 111              | <0.1         | 8.9           | <0.1          | 16.1            | 207                | 120              | 7                | 8             | 14           | 0.06            | 4.83    |
| S42 | Jan-22     | 11 | 6.1  | 541  | 293  | 5.13  | 100              | <0.1         | 7.8           | <0.1          | 14.0            | 148                | 83               | 7                | 7             | 11           | 0.04            | 1.65    |
| S42 | May-22     | 12 | 6.09 | 514  | 184  | 5.64  | 113              | 0.1          | 7.5           | <0.1          | 11.5            | 126                | 75               | 6                | 7             | 12           | 0.08            | -0.01   |
| S42 | Sep-22     | 15 | 6.28 | 482  | n.d. | 6.4   | 145              | 0.1          | 7.7           | 0.6           | 11.3            | 110                | 79               | 7                | 6             | 11           | 0.10            | -0.32   |
| S42 | Jan-23     | 11 | 6.5  | 515  | 161  | 4.37  | 139              | <0.1         | 6.2           | 0.9           | 9.1             | 97                 | 80               | 6                | 6             | 10           | 0.03            | 3.82    |
| S42 | Jun-23     | 12 | 7.18 | 478  | 188  | 4.29  | 193              | 0.4          | 3.5           | <0.1          | 4.8             | 73                 | 75               | 5                | 7             | 7            | 0.01            | -2.16   |
| S42 | Sep-23     | 12 | 6.02 | 497  | 198  | 5.45  | 131              | <0.1         | 2.9           | <0.1          | 5.0             | 99                 | 70               | 6                | 10            | 7            | <0.01           | 2.72    |

Table S5: Piezometer S60. Month and year of sampling, Temperature (T) in °C, pH values, Electrical Conductivity (E.C.) in  $\mu\text{S}/\text{cm}$ , redox potential (Eh) in mV, Hydraulic Head (H.I.) in m t.f.l., and concentrations of main cations and anions ( $\text{mg}\cdot\text{L}^{-1}$ ). Electroneutrality parameter in %; n.d. not determined.

| ID  | Month-years | T  | pH   | E.C. | Eh   | H.I.  | $\text{HCO}_3^-$ | $\text{F}^-$ | $\text{Cl}^-$ | $\text{Br}^-$ | $\text{NO}_3^-$ | $\text{SO}_4^{2-}$ | $\text{Ca}^{2+}$ | $\text{Mg}^{2+}$ | $\text{Na}^+$ | $\text{K}^+$ | $\text{NH}_4^+$ | Error % |
|-----|-------------|----|------|------|------|-------|------------------|--------------|---------------|---------------|-----------------|--------------------|------------------|------------------|---------------|--------------|-----------------|---------|
| S60 | May-13      | 12 | 6.07 | 430  | 234  | 15.15 | 21               | 0.3          | 6.4           | 0.1           | 3.7             | 134                | 32               | 13               | 13            | 13           | <0.01           | 3.00    |
| S60 | Sep-13      | 14 | 6.68 | 390  | n.d. | 15.33 | 28               | 0.2          | 6.9           | <0.1          | 5.1             | 123                | 22               | 16               | 14            | 13           | 0.40            | 1.24    |
| S60 | Jan-14      | 11 | 6.09 | 390  | 277  | 15.28 | 29               | <0.1         | 6.3           | <0.1          | 4.4             | 121                | 27               | 13               | 13            | 11.5         | 0.08            | 0.06    |
| S60 | May-14      | 13 | 6.24 | 520  | n.d. | 15.18 | 24               | 0.2          | 6.8           | <0.1          | 4.5             | 147                | 32               | 14               | 13            | 10.7         | 0.21            | -1.22   |
| S60 | Sep-14      | 13 | 6.8  | 450  | n.d. | 15.25 | 29               | 0.2          | 7.10          | <0.1          | 3.1             | 136                | 30               | 15               | 14            | 12           | <0.01           | 0.78    |
| S60 | Jan-15      | 12 | 6.01 | n.d. | n.d. | 15.2  | 26               | 0.1          | 7.05          | <0.1          | 5.8             | 144                | 30               | 14               | 16            | 13           | 0.06            | -0.06   |
| S60 | May-15      | 16 | 5.88 | 326  | 139  | 15.18 | 27               | 0.3          | 7.6           | <0.1          | 5.7             | 143                | 28               | 14               | 15            | 12           | 0.26            | -2.88   |
| S60 | Sep-15      | 15 | 5.74 | 267  | 226  | 15.28 | 28               | 0.2          | 7.9           | <0.1          | 5.1             | 137                | 23               | 15               | 15            | 14           | 0.10            | -2.93   |
| S60 | Jan-17      | 11 | 6.81 | 593  | n.d. | 14.8  | 40               | 0.1          | 6.2           | <0.1          | 4.4             | 78                 | 18               | 11               | 13            | 11           | 0.13            | 2.56    |
| S60 | Jun-18      | 12 | 6.64 | 530  | n.d. | 15.13 | 28               | 0.4          | 7.3           | <0.1          | 4.4             | 95                 | 26               | 11               | 11            | 10           | <0.01           | 3.80    |
| S60 | Mar-19      | 12 | 7.04 | 357  | n.d. | 15.20 | 28               | <0.1         | 6.1           | 0.3           | 6.1             | 104                | 23               | 12               | 12            | 9            | 0.02            | 0.34    |
| S60 | Oct-19      | 15 | 6.00 | 276  | n.d. | 15.38 | 31               | <0.1         | 11            | <0.1          | 5.4             | 85                 | 17               | 11               | 11            | 9            | 0.08            | -4.32   |
| S60 | Jan-20      | 11 | 6.63 | 212  | 182  | 15.2  | 31               | <0.1         | 9.6           | 0.7           | 5.5             | 103                | 31               | 12               | 13            | 4            | 0.02            | 3.00    |
| S60 | May-20      | 13 | 6.8  | 422  | n.d. | 15.25 | 29               | 0.5          | 12            | <0.1          | 5.5             | 106                | 26               | 11               | 13            | 11           | 0.01            | -1.52   |
| S60 | Oct-20      | 13 | 7.32 | 357  | 40   | 15.4  | 32               | 0.2          | 13.0          | 0.2           | 2.8             | 92                 | 16               | 13               | 11            | 10           | 0.02            | -3.43   |
| S60 | Jan-21      | 11 | 6.43 | 273  | 40   | n.d.  | 31               | 0.1          | 4.9           | 0.4           | 4.6             | 92                 | 21               | 10               | 11            | 8            | <0.01           | -1.69   |

Table S6: Piezometer S101. Month and year of sampling, Temperature (T) in °C, pH values, Electrical Conductivity (E.C.) in  $\mu\text{S}/\text{cm}$ , redox potential (Eh) in mV, Hydraulic Head (H.I.) in m t.f.l., and concentrations of main cations and anions ( $\text{mg}\cdot\text{L}^{-1}$ ). Electroneutrality parameter in %; n.d. not determined.

| ID    | Month-year | T  | pH    | E.C. | Eh   | H.I.  | $\text{HCO}_3^-$ | $\text{F}^-$ | $\text{Cl}^-$ | $\text{Br}^-$ | $\text{NO}_3^-$ | $\text{SO}_4^{2-}$ | $\text{Ca}^{2+}$ | $\text{Mg}^{2+}$ | $\text{Na}^+$ | $\text{K}^+$ | $\text{NH}_4^+$ | Error % |
|-------|------------|----|-------|------|------|-------|------------------|--------------|---------------|---------------|-----------------|--------------------|------------------|------------------|---------------|--------------|-----------------|---------|
| S101  | Feb-13     | 11 | 6.57  | 350  | 199  | 10.32 | 96               | 0.5          | 12.1          | 0.4           | 1.5             | 42                 | 45               | 3                | 6             | 5            | 0.36            | 0.55    |
| S101  | May-13     | 11 | 6.57  | 380  | n.d. | 7.42  | 98               | 0.4          | 13.2          | <0.1          | 3.5             | 46                 | 53               | 4                | 6             | 4            | 0.1             | 4.59    |
| S101  | Sep-13     | 11 | 7.63  | 280  | n.d. | 9.62  | 74               | 0.2          | 13.0          | <0.1          | 0.9             | 36                 | 33               | 3                | 6             | 3            | 0.1             | -2.59   |
| S101  | Jan-14     | 10 | 6.93  | 300  | 234  | 9.16  | 107              | <0.1         | 9.4           | <0.1          | 0.4             | 37                 | 43               | 3                | 6             | 3            | 0.16            | -1.23   |
| S101  | May-14     | 12 | 6.93  | 350  | n.d. | 7.13  | 122              | 0.2          | 10.6          | <0.1          | 0.7             | 42                 | 51               | 3                | 5             | 4            | 0.10            | -1.75   |
| S101  | Sep-14     | 11 | 6.64  | 553  | n.d. | 7.97  | 122              | 0.3          | 12.3          | <0.1          | 0.6             | 46                 | 52               | 4                | 8             | 4            | 0.09            | 0.35    |
| S101  | Jan-15     | 12 | 6.18  | n.d. | n.d. | 7.92  | 120              | 0.2          | 9.5           | <0.1          | 0.9             | 44                 | 53               | 3                | 9             | 5            | 0.13            | 4.12    |
| S101  | May-15     | 13 | 6.60  | 467  | 162  | 7.42  | 113              | 0.2          | 9.9           | <0.1          | 0.5             | 45                 | 49               | 3                | 6             | 4            | 0.04            | -0.39   |
| S101  | Sep-15     | 12 | 6.54  | 230  | 149  | 8.45  | 117              | <0.1         | 9.9           | <0.1          | <0.1            | 35                 | 52               | 3                | 6             | 3            | 0.06            | 4.44    |
| S 101 | Jan-17     | 9  | 7.21  | 147  | n.d. | 8.10  | 61               | <0.1         | 3.2           | <0.1          | 1.4             | 8                  | 20               | 1                | 2             | 2            | 0.08            | -2.91   |
| S 101 | Jan-18     | 14 | 6.88  | 300  | n.d. | 9.01  | 217              | 0.3          | 9.7           | <0.1          | 3.0             | 31                 | 86               | 3                | 6             | 3            | 0.37            | 3.58    |
| S 101 | Mar-19     | 12 | 7.22  | 473  | n.d. | 8.73  | 178              | 0.2          | 7.2           | <0.1          | 1.3             | 26                 | 63               | 3                | 5             | 3            | <0.01           | 0.05    |
| S 101 | Oct-19     | 11 | 7.30  | 308  | 152  | 8.82  | 205              | 0.3          | 12.3          | <0.1          | 0.7             | 31                 | 75               | 3                | 10            | 3            | 0.02            | 1.49    |
| S101  | Jan-20     | 10 | 8.00  | 458  | n.d. | 7.82  | 198              | 0.4          | 13.7          | 1.3           | 0.9             | 41                 | 73               | 4                | 6             | 2            | 0.01            | -3.00   |
| S101  | May-20     | 13 | 7.41  | 483  | n.d. | 8.05  | 198              | 0.3          | 17.5          | <0.1          | 0.1             | 41                 | 73               | 3                | 10            | 25           | 0.01            | 3.85    |
| S101  | Oct-20     | 11 | 7.64  | 676  | n.d. | 8.3   | 196              | 0.2          | 23.2          | 0.6           | 0.5             | 56                 | 83               | 4                | 10            | 4            | 0.03            | -0.05   |
| S101  | Apr-21     | 12 | 7.40  | 383  | 20   | 7.55  | 194              | <0.1         | 0.4           | 1.5           | 0.5             | 1                  | 56               | 3                | 5             | 3            | 0.06            | 2.51    |
| S101  | Sep-21     | 13 | 7.00  | 378  | 26   | 8.75  | 196              | 0.2          | 9.5           | 0.1           | 0.5             | 29                 | 95               | 3                | 6             | 3            | 0.01            | 1.27    |
| S101  | Jan-22     | 11 | 7.47  | 142  | -40  | 9.08  | 63               | <0.1         | 4.2           | <0.1          | 0.8             | 7                  | 22               | 1                | 1             | 2            | 0.10            | -2.86   |
| S101  | May-22     | 13 | 9.90  | 477  | 228  | 13.30 | 165              | 0.1          | 7.9           | <0.1          | 0.0             | 22                 | 53               | 2                | 5             | 2            | 0.14            | -4.44   |
| S101  | Sep-22     | 13 | 11.40 | 345  | n.d. | 12.5  | 178              | 0.4          | 9.2           | 0.7           | <0.1            | 25                 | 62               | 3                | 5             | 4            | <0.01           | -1.04   |
| S101  | Jan-23     | 11 | 10.01 | 395  | 216  | 11.4  | 204              | 0.1          | 8.3           | 0.9           | 3.0             | 21                 | 68               | 3                | 5             | 3            | <0.01           | -1.24   |
| S101  | Jun-23     | 13 | 6.58  | 343  | 213  | 9.86  | 119              | 0.1          | 10.5          | <0.1          | 4.7             | 21                 | 43               | 4                | 5             | 2            | <0.01           | -0.02   |
| S101  | Sep-23     | 12 | 7.09  | 363  | 181  | 10.14 | 183              | 0.1          | 10.4          | <0.1          | 4.8             | 23                 | 61               | 2                | 5             | 2            | <0.01           | -4.73   |

Table S7: Piezometer S106. Month and year of sampling, Temperature (T) in °C, pH values, Electrical Conductivity (E.C.) in  $\mu\text{S}/\text{cm}$ , redox potential (Eh) in mV, Hydraulic Head (H.I.) in m t.f.l., and concentrations of main cations and anions ( $\text{mg}\cdot\text{L}^{-1}$ ). Electroneutrality parameter in %; n.d. not determined.

| ID   | Month-year | T  | pH   | E.C.  | Eh   | H.I. | $\text{HCO}_3^-$ | $\text{F}^-$ | $\text{Cl}^-$ | $\text{Br}^-$ | $\text{NO}_3^-$ | $\text{SO}_4^{2-}$ | $\text{Ca}^{2+}$ | $\text{Mg}^{2+}$ | $\text{Na}^+$ | $\text{K}^+$ | $\text{NH}_4^+$ | Error % |
|------|------------|----|------|-------|------|------|------------------|--------------|---------------|---------------|-----------------|--------------------|------------------|------------------|---------------|--------------|-----------------|---------|
| S106 | Feb-13     | 10 | 6.88 | 420   | 268  | 3.75 | 152              | 0.1          | 13.1          | <0.1          | 7.0             | 118                | 95               | 5                | 6             | 4            | 0.04            | 0.64    |
| S106 | May-13     | 11 | 6.53 | 690   | 261  | 3.55 | 135              | 0.4          | 13.8          | <0.1          | 17.4            | 156                | 109              | 6                | 6             | 5            | <0.01           | 1.24    |
| S106 | Sep-13     | 12 | 6.39 | 530   | n.d. | 5.07 | 43               | 0.2          | 13.0          | <0.1          | 16.0            | 177                | 84               | 6                | 6             | 6            | 0.50            | 0.97    |
| S106 | Jan-14     | 10 | 5.88 | 480   | 240  | 5.22 | 61               | 0.1          | 8.7           | <0.1          | 10.1            | 122                | 67               | 5                | 7             | 7            | 0.09            | 3.48    |
| S106 | May-14     | 11 | 5.99 | 580   | n.d. | 3.64 | 126              | 0.1          | 6.0           | <0.1          | 9.5             | 93                 | 64               | 5                | 13            | 7            | 0.23            | -0.45   |
| S106 | Sep-14     | 13 | 7.00 | 495   | n.d. | 4.47 | 94               | 0.1          | 7.0           | <0.1          | 14.0            | 121                | 69               | 5                | 13            | 6            | 0.03            | 3.87    |
| S106 | Jan-15     | 14 | 7.50 | n.d.  | n.d. | 3.72 | 137              | 0.2          | 6.2           | <0.1          | 9.0             | 58                 | 59               | 4                | 13            | 10           | 0.10            | 3.85    |
| S106 | May-15     | 11 | 6.62 | 267   | 121  | 3.66 | 83               | 0.2          | 4.6           | <0.1          | 6.3             | 51                 | 45               | 3                | 7             | 5            | 0.06            | 4.53    |
| S106 | Sep-15     | 12 | 6.39 | 290   | n.d. | 4.35 | 74               | 0.1          | 8.4           | <0.1          | 9.4             | 109                | 61               | 4                | 8             | 8            | 0.15            | 1.13    |
| S106 | Jan-17     | 10 | 7.20 | 280   | n.d. | 5.10 | 110              | 0.1          | 4.9           | 0.6           | 6.9             | 27                 | 45               | 2                | 3             | 5            | 0.14            | 1.68    |
| S106 | Jan-18     | 14 | 7.50 | 470   | n.d. | 3.79 | 45               | 0.1          | 10.5          | 0.5           | 17.7            | 120                | 67               | 4                | 6             | 4            | 0.41            | 2.45    |
| S106 | Jun-18     | 10 | 6.86 | 431   | n.d. | 3.87 | 45               | <0.1         | 6.9           | <0.1          | 10.4            | 100                | 50               | 4                | 6             | 3            | <0.01           | 0.43    |
| S106 | Oct-19     | 12 | 7.60 | 169   | 128  | 4.70 | 48               | 0.2          | 11.3          | <0.1          | 9.7             | 97                 | 54               | 4                | 6             | 4            | 0.04            | 1.81    |
| S106 | Jan-20     | 10 | 5.79 | 227   | 185  | 3.53 | 57               | <0.1         | 47.0          | 1.3           | 9.1             | 100                | 68               | 4                | 9             | 4            | 0.02            | -3.13   |
| S106 | May-20     | 12 | 7.58 | 426   | n.d. | 3.80 | 52               | 0.2          | 12.7          | <0.1          | 10.4            | 119                | 58               | 5                | 5             | 4            | 0.01            | -3.05   |
| S106 | Oct-20     | 12 | 7.32 | 344   | 40   | 4.83 | 31               | 0.2          | 12.8          | 0.2           | 9.2             | 87                 | 47               | 5                | 7             | 2            | 0.03            | 4.03    |
| S106 | Jan-21     | 10 | 7.37 | 323   | -18  | 3.58 | 45               | 0.1          | 6.7           | 0.5           | 12.5            | 82                 | 46               | 4                | 5             | 3            | 0.01            | 1.34    |
| S106 | Apr-21     | 12 | 6.20 | 368   | 36   | 3.95 | 80               | <0.1         | 5.6           | 0.6           | 9.1             | 77                 | 52               | 5                | 5             | 3            | 0.06            | 2.16    |
| S106 | Sep-21     | 11 | 6.35 | 348.0 | 26   | 5.84 | 70               | 0.1          | 9.0           | <0.1          | 10.8            | 110                | 67               | 5                | 6             | 4            | 0.21            | 2.88    |
| S106 | Sep-23     | 13 | 6.45 | 310   | 233  | 5.74 | 49               | 0.1          | 10.0          | <0.1          | 12.6            | 101                | 49               | 4                | 6             | 4            | 0.13            | -3.90   |

Table S8: Piezometer S108. Month and year of sampling, Temperature (T) in °C, pH values, Electrical Conductivity (E.C.) in  $\mu\text{S}/\text{cm}$ , redox potential (Eh) in mV, Hydraulic Head (H.I.) in m t.f.l., and concentrations of main cations and anions ( $\text{mg}\cdot\text{L}^{-1}$ ). Electroneutrality parameter in %; n.d. not determined.

| ID   | Month-year | T    | pH    | E.C. | Eh   | H.I. | $\text{HCO}_3^-$ | $\text{F}^-$ | $\text{Cl}^-$ | $\text{Br}^-$ | $\text{NO}_3^-$ | $\text{SO}_4^{2-}$ | $\text{Ca}^{2+}$ | $\text{Mg}^{2+}$ | $\text{Na}^+$ | $\text{K}^+$ | $\text{NH}_4^+$ | Error % |
|------|------------|------|-------|------|------|------|------------------|--------------|---------------|---------------|-----------------|--------------------|------------------|------------------|---------------|--------------|-----------------|---------|
| S108 | Feb-13     | 13   | 9.94  | 490  | 7.1  | 4.17 | 152              | 0.2          | 12.3          | 0.2           | 1.1             | 59                 | 38               | 6                | 32            | 28           | 0.05            | 4.48    |
| S108 | May-13     | 13   | 10.63 | 220  | 128  | 3.70 | 71               | 0.2          | 7.8           | 0.1           | 0.6             | 16                 | 18               | 1                | 10            | 16           | 0.50            | 2.87    |
| S108 | Sep-13     | 14   | 9.62  | 250  | n.d. | 5.25 | 63               | 0.1          | 7.6           | <0.1          | 4.2             | 26                 | 12               | 1                | 12            | 20           | 0.40            | -4.36   |
| S108 | Jan-14     | 12   | 6.51  | 660  | 150  | 5.43 | 85               | 0.1          | 7.9           | <0.1          | 0.0             | 197                | 72               | 15               | 14            | 23           | 0.24            | 2.63    |
| S108 | May-14     | 14   | 6.96  | 570  | n.d. | 4.07 | 226              | 0.2          | 10.1          | <0.1          | 1.1             | 82                 | 84               | 8                | 10            | 17           | 0.19            | 0.00    |
| S108 | Sep-14     | 13   | 7.06  | 547  | n.d. | 4.98 | 220              | 0.2          | 10.0          | <0.1          | <0.1            | 99                 | 85               | 9                | 10            | 18           | <0.01           | -0.80   |
| S108 | Jan-15     | n.d. | n.d.  | n.d. | n.d. | 4.45 | 140              | 0.3          | 9.3           | <0.1          | <0.1            | 61                 | 58               | 6                | 10            | 16           | 0.30            | 4.51    |
| S108 | May-15     | 14   | 6.17  | 617  | 198  | 5.37 | 60               | 0.2          | 6.5           | <0.1          | 4.9             | 255                | 78               | 18               | 11            | 13           | 0.19            | -2.61   |
| S108 | Sep-15     | 15   | 9.92  | 750  | 224  | 5.30 | 32               | 0.4          | 10.4          | <0.1          | 6.9             | 495                | 127              | 34               | 19            | 24           | 0.08            | -3.07   |
| S108 | Jan-17     | 12   | 6.63  | 779  | n.d. | 5.73 | 110              | 0.1          | 6.7           | <0.1          | 18.0            | 227                | 97               | 21               | 14            | 19           | 0.20            | 4.11    |
| S108 | Jun-18     | 11   | 6.50  | 390  | n.d. | 4.65 | 35               | 0.6          | 22.0          | <0.1          | 12.0            | 514                | 138              | 34               | 19            | 20           | 0.40            | -4.67   |
| S108 | Mar-19     | 13   | 6.86  | 1052 | n.d. | 4.61 | 26               | 0.2          | 12.3          | <0.1          | 11.3            | 525                | 138              | 36               | 20            | 21           | 0.02            | -2.71   |
| S108 | Oct-19     | 13   | 6.38  | 524  | n.d. | 5.58 | 29               | 0.3          | 20.4          | <0.1          | 7.8             | 420                | 136              | 34               | 18            | 21           | 0.02            | 4.60    |
| S108 | Jan-20     | 12   | 6.59  | 939  | 122  | 3.88 | 21               | 1.7          | 20.1          | 3.5           | 10.0            | 497                | 150              | 43               | 23            | 19           | 0.02            | 4.17    |
| S108 | May-20     | 14   | 8.42  | 1030 | n.d. | 4.73 | 26               | 1.1          | 26.2          | 0.5           | 11.7            | 476                | 144              | 35               | 25            | 26           | 0.01            | 2.52    |
| S108 | Oct-20     | 13   | 7.32  | 941  | 35   | 5.65 | 51               | 0.4          | 22.4          | 0.5           | 6.7             | 389                | 138              | 29               | 17            | 14           | 0.33            | 3.79    |
| S108 | Jan-21     | 13   | 6.76  | 968  | 17   | 3.87 | 50               | <0.1         | 6.7           | 0.9           | 11.6            | 474                | 141              | 32               | 20            | 19           | 0.06            | -0.16   |
| S108 | Apr-21     | 14   | 6.50  | 736  | 37   | 4.43 | 74               | <0.1         | 5.6           | 0.8           | 5.5             | 220                | 86               | 18               | 14            | 11           | 0.26            | 4.70    |
| S108 | Sep-21     | 15   | 6.80  | 1006 | 26   | 8.9  | 33               | 0.8          | 27.2          | 0.1           | 11.5            | 475                | 170              | 32               | 18            | 22           | 0.01            | 4.58    |
| S108 | Jan-22     | 13   | 5.49  | 946  | 352  | 5.63 | 31               | <0.1         | 7.8           | <0.1          | 10.7            | 436                | 129              | 30               | 18            | 25           | 0.04            | 2.00    |
| S108 | May-22     | 15   | 5.52  | 956  | 301  | 5.92 | 111              | <0.1         | 11.2          | <0.1          | 6.5             | 250                | 106              | 21               | 15            | 20           | 0.17            | 4.82    |
| S108 | Sep-22     | 13   | 6.52  | 940  | n.d. | 6.80 | 30               | 0.2          | 8.4           | 0.3           | 9.2             | 425                | 126              | 29               | 18            | 21           | <0.01           | 1.29    |
| S108 | Jan-23     | 13   | 6.08  | 872  | 221  | 5.21 | 35               | 0.2          | 6.9           | 0.6           | 8.6             | 323                | 116              | 10               | 13            | 10           | 0.03            | -1.38   |
| S108 | Jun-23     | 14   | 6.93  | 420  | 218  | 4.89 | 38               | 0.1          | 7.0           | <0.1          | 10.1            | 300                | 111              | 10               | 16            | 19           | <0.01           | 1.82    |
| S108 | Sep-23     | 15   | 6.54  | 863  | 232  | 8.90 | 31               | 0.1          | 8.2           | <0.1          | 11.3            | 433                | 115              | 27               | 18            | 20           | 0.08            | -3.82   |



Table S9: Piezometer S109. Month and year of sampling, Temperature (T) in °C, pH values, Electrical Conductivity (E.C.) in  $\mu\text{S}/\text{cm}$ , redox potential (Eh) in mV, Hydraulic Head (H.I.) in m t.f.l., and concentrations of main cations and anions ( $\text{mg}\cdot\text{L}^{-1}$ ). Electroneutrality parameter in %; n.d. not determined.

| ID   | Month-year | T    | pH   | E.C. | Eh   | H.I. | $\text{HCO}_3^-$ | $\text{F}^-$ | $\text{Cl}^-$ | $\text{Br}^-$ | $\text{NO}_3^-$ | $\text{SO}_4^{2-}$ | $\text{Ca}^{2+}$ | $\text{Mg}^{2+}$ | $\text{Na}^+$ | $\text{K}^+$ | $\text{NH}_4^+$ | Error % |
|------|------------|------|------|------|------|------|------------------|--------------|---------------|---------------|-----------------|--------------------|------------------|------------------|---------------|--------------|-----------------|---------|
| S109 | Feb-13     | 12   | 7.3  | 380  | 210  | 7.63 | 84               | 0.3          | 11.3          | <0.1          | 1.5             | 71                 | 45               | 4                | 7             | 9            | 0.04            | -2.20   |
| S109 | May-13     | 12   | 6.86 | 530  | 243  | 7.66 | 128              | 0.6          | 16.3          | <0.1          | 5.0             | 155                | 104              | 5                | 8             | 10           | <0.01           | 2.50    |
| S109 | Sep-13     | 12   | 6.41 | 850  | n.d. | 8.55 | 135              | 0.3          | 18.0          | <0.1          | 7.9             | 217                | 119              | 9                | 10            | 18           | <0.01           | 1.52    |
| S109 | Jan-14     | 11   | 6.65 | 710  | 240  | 8.33 | 148              | 0.2          | 14.4          | 0.2           | 8.0             | 216                | 112              | 8                | 9             | 14           | <0.01           | -2.20   |
| S109 | May-14     | 17   | 6.68 | 750  | n.d. | 7.75 | 188              | 0.2          | 17.0          | <0.1          | 10.0            | 233                | 118              | 9                | 22            | 15           | 0.32            | -3.46   |
| S109 | Sep-14     | 12   | 6.58 | 854  | n.d. | 8.38 | 124              | 0.1          | 14.4          | <0.1          | 8.6             | 237                | 119              | 9                | 10            | 15           | <0.01           | -0.12   |
| S109 | Jan-15     | n.d. | n.d. | n.d. | n.d. | 8.02 | 121              | 0.2          | 16.5          | <0.1          | 13.0            | 274                | 121              | 9                | 12            | 16           | 0.12            | -3.61   |
| S109 | May-15     | 14   | 6.7  | 756  | 150  | 8.00 | 144              | 0.2          | 15.4          | <0.1          | 13.1            | 246                | 123              | 10               | 3             | 16           | 0.04            | -4.16   |
| S109 | Sep-15     | 14   | 6.43 | 590  | 149  | 8.50 | 126              | 0.1          | 16.9          | <0.1          | 10.9            | 258                | 125              | 10               | 11            | 17           | 0.10            | -0.74   |
| S109 | Jan-17     | 11   | 6.76 | 801  | n.d. | 8.65 | 160              | 0.1          | 12.9          | <0.1          | 13.0            | 180                | 120              | 9                | 10            | 16           | 0.03            | 4.64    |
| S109 | Jun-18     | 15   | 6.21 | 1020 | n.d. | 8.03 | 118              | 0.6          | 22.2          | <0.1          | 12.4            | 233                | 115              | 9                | 10            | 15           | <0.01           | -2.43   |
| S109 | Mar-19     | 12   | 7.06 | 837  | n.d. | 7.83 | 118              | 1.1          | 17.8          | <0.1          | 12.7            | 231                | 119              | 10               | 10            | 15           | <0.01           | 0.63    |
| S109 | May-19     | 12   | 7.05 | 385  | 167  | 8.60 | 122              | 0.2          | 15.0          | 0.1           | 13.5            | 211                | 121              | 8                | 10            | 15           | 0.02            | 3.31    |
| S109 | Oct-19     | 11   | 7.60 | 736  | 133  | 7.43 | 122              | 1.3          | 32.4          | <0.1          | 15.8            | 271                | 142              | 13               | 13            | 20           | 0.03            | 2.01    |
| S109 | Jan-20     | 13   | 6.86 | 765  | n.d. | 8.29 | 118              | 0.3          | 24.7          | <0.1          | 17.8            | 258                | 123              | 9                | 11            | 14           | 0.01            | -3.38   |
| S109 | May-20     | 12   | 7.32 | 691  | 5    | 8.47 | 117              | <0.1         | 20.3          | 0.3           | 14.1            | 192                | 112              | 9                | 10            | 11           | 0.03            | 2.20    |
| S109 | Oct-20     | 12   | 7.22 | 1066 | -2.6 | 7.12 | 139              | 0.1          | 16.5          | 1.0           | 15.9            | 178                | 113              | 8                | 13            | 12           | 0.01            | 3.51    |
| S109 | Jan-21     | 12   | 6.50 | 660  | 35   | 8.17 | 133              | 0.2          | 12.9          | 0.8           | 12.4            | 131                | 92               | 8                | 9             | 12           | 1.15            | 4.43    |
| S109 | Apr-21     | 14   | 6.90 | 675  | 27   | 5.90 | 160              | <0.1         | 21.9          | 0.2           | 17.2            | 236                | 150              | 9                | 11            | 15           | 0.06            | 3.84    |
| S109 | Sep-21     | 14   | 6.9  | 675  | 27   | 5.90 | 116              | 0.1          | 16.1          | <0.1          | 14.0            | 173                | 105              | 8                | 10            | 14           | 0.05            | 3.62    |
| S109 | Jan-22     | 13   | 6.5  | 704  | 244  | 8.65 | 126              | 0.1          | 14.2          | <0.1          | 13.7            | 188                | 101              | 8                | 9             | 13           | 0.08            | -1.40   |
| S109 | May-22     | 15   | 5.50 | 333  | 302  | 6.88 | 26               | <0.1         | 10.5          | <0.1          | 11.1            | 93                 | 29               | 8                | 9             | 6            | 0.08            | -3.66   |
| S109 | Sep-22     | 12   | 6.80 | 660  | n.d. | 7.96 | 133              | 0.1          | 12.0          | 0.8           | 13.3            | 197                | 114              | 9                | 12            | 14           | <0.01           | 3.62    |
| S109 | Jan-23     | 13   | 6.64 | 685  | 233  | 8.02 | 127              | 0.1          | 20.5          | <0.1          | 12.4            | 201                | 105              | 8                | 10            | 13           | 0.01            | -3.25   |
| S109 | Jun-23     | 13   | 6.84 | 688  | 248  | 8.80 | 134              | 0.1          | 14.9          | <0.1          | 11.9            | 215                | 109              | 8                | 10            | 13           | <0.01           | -3.42   |
| S109 | Sep-23     | 13   | 6.84 | 688  | 248  | 8.80 | 134              | 0.1          | 14.9          | <0.1          | 11.9            | 215                | 109              | 8                | 10            | 13           | <0.01           | -3.42   |

Table S10: Piezometer S111. Month and year of sampling, Temperature (T) in °C, pH values, Electrical Conductivity (E.C.) in  $\mu\text{S}/\text{cm}$ , redox potential (Eh) in mV, Hydraulic Head (H.I.) in m t.f.l., and concentrations of main cations and anions ( $\text{mg}\cdot\text{L}^{-1}$ ). Electroneutrality parameter in %; n.d. not determined.

| ID   | Month-year | T    | pH   | E.C. | Eh   | H.I. | $\text{HCO}_3^-$ | F <sup>-</sup> | $\text{Cl}^-$ | $\text{Br}^-$ | $\text{NO}_3^-$ | $\text{SO}_4^{2-}$ | $\text{Ca}^{2+}$ | $\text{Mg}^{2+}$ | $\text{Na}^+$ | $\text{K}^+$ | $\text{NH}_4^+$ | Error % |
|------|------------|------|------|------|------|------|------------------|----------------|---------------|---------------|-----------------|--------------------|------------------|------------------|---------------|--------------|-----------------|---------|
| S111 | Feb-13     | 12   | 7.85 | 320  | 196  | 4.88 | 99               | 0.9            | 11.1          | <0.1          | 0.1             | 40                 | 30               | 9                | 8             | 7            | 0.04            | -0.78   |
| S111 | May-13     | 12   | 7.79 | 430  | 256  | 5.20 | 137              | 0.7            | 12.2          | 0.1           | <0.1            | 64                 | 49               | 11               | 11            | 7            | <0.01           | 0.53    |
| S111 | Sep-13     | 13   | 6.99 | 690  | n.d. | 5.89 | 151              | 0.4            | 11.0          | <0.1          | 0.1             | 123                | 64               | 18               | 13            | 12           | <0.01           | 1.68    |
| S111 | Jan-14     | 12   | 7.63 | 540  | 249  | 5.40 | 165              | 0.4            | 9.9           | <0.1          | 0.2             | 105                | 66               | 16               | 13            | 10           | <0.01           | 2.07    |
| S111 | May-14     | 13   | 7.04 | 720  | n.d. | 5.25 | 123              | 0.4            | 11.0          | 0.30          | 0.3             | 270                | 77               | 30               | 16            | 15           | 0.10            | -3.89   |
| S111 | Sep-14     | 13   | 6.87 | 860  | n.d. | 4.60 | 133              | 0.3            | 9.3           | <0.1          | 0.6             | 250                | 76               | 29               | 16            | 16           | <0.01           | -2.51   |
| S111 | Jan-15     | n.d. | n.d. | n.d. | n.d. | 4.57 | 135              | 0.5            | 9.9           | <0.1          | 1.6             | 260                | 87               | 31               | 17            | 16           | 0.10            | 0.59    |
| S111 | May-15     | 14   | 6.71 | 617  | 198  | 5.37 | 109              | 0.6            | 9.1           | <0.1          | 1.5             | 276                | 74               | 29               | 16            | 15           | 0.09            | -4.37   |
| S111 | Sep-15     | 13   | 6.61 | 580  | 61   | 5.85 | 106              | 0.2            | 9.2           | 0.11          | 0.3             | 296                | 82               | 32               | 17            | 17           | 0.08            | -1.69   |
| S111 | Jan-17     | 11   | 7.15 | 835  | n.d. | 5.74 | 177              | <0.1           | 4.4           | 1.31          | 0.9             | 220                | 94               | 30               | 18            | 17           | 0.08            | 4.73    |
| S111 | Jun-18     | 13   | 6.87 | 800  | n.d. | 5.22 | 188              | 0.8            | 21.6          | 0.60          | 3.1             | 278                | 118              | 30               | 18            | 16           | <0.01           | 0.03    |
| S111 | Mar-19     | 12   | 7.18 | 864  | n.d. | 5.09 | 167              | 0.4            | 13.3          | <0.1          | 2.5             | 241                | 95               | 28               | 17            | 15           | 0.02            | -0.32   |
| S111 | Oct-19     | 13   | 6.92 | 548  | 115  | 5.51 | 161              | <0.1           | 11.8          | 2             | 2.3             | 283                | 100              | 29               | 17            | 13           | 0.02            | -2.63   |
| S111 | Jan-20     | 12   | 7.90 | 708  | 149  | 4.99 | 149              | 1.8            | 39.8          | <0.1          | 4.5             | 333                | 114              | 35               | 20            | 17           | 0.03            | -3.86   |
| S111 | May-20     | 13   | 7.87 | 920  | n.d. | 5.11 | 146              | 0.7            | 22.3          | <0.1          | 2.5             | 317                | 98               | 38               | 42            | 23           | 0.01            | 3.49    |
| S111 | Oct-20     | 13   | 7.32 | 705  | 5    | 5.65 | 122              | <0.1           | 17.5          | 0.44          | <0.1            | 311                | 102              | 41               | 22            | 8            | 0.04            | 3.47    |
| S111 | Jan-21     | 13   | 7.12 | 759  | -1.7 | 4.81 | 150              | 0.3            | 18.4          | 1.2           | 3.9             | 246                | 101              | 33               | 18            | 15           | 0.01            | 4.72    |
| S111 | Apr-21     | 13   | 6.80 | 759  | 37   | 5.5  | 131              | <0.1           | 5.7           | 1.00          | 2.0             | 220                | 81               | 28               | 15            | 14           | 0.10            | 2.97    |
| S111 | Sep-21     | 14   | 7.00 | 832  | 29   | 5.96 | 171              | 0.4            | 18.6          | 0.52          | 4.7             | 308                | 150              | 29               | 18            | 16           | 0.06            | 5.97    |
| S111 | Jan-22     | 12   | 6.6  | 729  | 136  | 5.34 | 117              | 0.2            | 8.3           | <0.1          | 2.0             | 255                | 93               | 32               | 15            | 11           | 0.14            | 4.29    |
| S111 | May-22     | 14   | 6.60 | 830  | 266  | 5.48 | 153              | 0.2            | 10.6          | <0.1          | 1.6             | 279                | 95               | 30               | 19            | 14           | 0.10            | -1.62   |
| S111 | Sep-22     | 12   | 7.10 | 811  | n.d. | 6.36 | 159              | 0.2            | 9.5           | <0.1          | 0.5             | 267                | 102              | 32               | 17            | 15           | <0.01           | 2.23    |
| S111 | Jan-23     | 13   | 6.80 | 772  | 192  | 5.10 | 157              | 0.2            | 8.8           | 0.85          | 2.5             | 239                | 97               | 31               | 17            | 15           | 0.01            | 4.12    |
| S111 | Jun-23     | 15   | 6.67 | 771  | 223  | 5.18 | 127              | 0.2            | 8.8           | <0.1          | 2.5             | 251                | 119              | 17               | 9             | 8            | <0.01           | 2.23    |
| S111 | Sep-23     | 13   | 6.73 | 764  | 224  | 5.78 | 138              | 0.2            | 5.5           | <0.1          | 1.6             | 217                | 81               | 31               | 16            | 14           | 0.02            | 4.46    |

Table S11: Piezometer S113. Month and year of sampling, Temperature (T) in °C, pH values, Electrical Conductivity (E.C.) in  $\mu\text{S}/\text{cm}$ , redox potential (Eh) in mV, Hydraulic Head (H.I.) in m t.f.l., and concentrations of main cations and anions ( $\text{mg}\cdot\text{L}^{-1}$ ). Electroneutrality parameter in %; n.d. not determined.

| ID   | Month-year | T    | pH   | E.C. | Eh   | H.I. | $\text{HCO}_3^-$ | F <sup>-</sup> | Cl <sup>-</sup> | Br <sup>-</sup> | $\text{NO}_3^-$ | $\text{SO}_4^{2-}$ | $\text{Ca}^{2+}$ | $\text{Mg}^{2+}$ | $\text{Na}^+$ | $\text{K}^+$ | $\text{NH}_4^+$ | Error % |
|------|------------|------|------|------|------|------|------------------|----------------|-----------------|-----------------|-----------------|--------------------|------------------|------------------|---------------|--------------|-----------------|---------|
| S113 | Feb-13     | 13   | 5.82 | 440  | 242  | 6.85 | 35               | 0.3            | 12.0            | <0.1            | 10.3            | 130                | 42               | 9                | 11            | 9            | 0.08            | -3.20   |
| S113 | May-13     | 13   | 5.82 | 390  | 305  | 6.83 | 23               | 1.1            | 12.9            | <0.1            | 10.1            | 113                | 35               | 9                | 10            | 8            | <0.01           | -3.68   |
| S113 | Sep-13     | 13   | 6.07 | 370  | n.d. | 7.13 | 20               | 0.2            | 12.0            | <0.1            | 12.0            | 112                | 32               | 9                | 11            | 10           | 0.50            | -1.91   |
| S113 | Jan-14     | 12   | 5.7  | 350  | 305  | 7.20 | 6                | 0.1            | 10.8            | <0.1            | 10.2            | 107                | 30               | 8                | 11            | 7            | 0.06            | 0.17    |
| S113 | May-14     | 14   | 5.85 | 480  | n.d. | 6.97 | 12               | 0.4            | 11.6            | <0.1            | 9.7             | 103                | 27               | 8                | 10            | 8            | 0.17            | -3.38   |
| S113 | Sep-14     | 13   | 6.32 | 532  | n.d. | 6.91 | 13               | 0.3            | 12.3            | 0.24            | 9.2             | 113                | 30               | 8                | 11            | 8            | <0.01           | -3.65   |
| S113 | Jan-15     | n.d. | n.d. | n.d. | n.d. | 7.07 | 14               | 0.3            | 11.8            | <0.1            | 10.7            | 103                | 30               | 8                | 11            | 8            | 0.06            | -0.38   |
| S113 | May-15     | 14   | 5.6  | 278  | 233  | 6.94 | 21               | 0.2            | 11.0            | <0.1            | 11.3            | 99                 | 31               | 8                | 10            | 7            | 0.04            | -1.87   |
| S113 | Sep-15     | 13   | 5.81 | 220  | 210  | 7.04 | 28               | 0.2            | 12.0            | <0.1            | 10.0            | 106                | 30               | 8                | 10            | 10           | 1.10            | -4.21   |
| S113 | Jan-17     | 13   | 6.02 | 466  | n.d. | 7.07 | 30               | 0.1            | 11.0            | <0.1            | 8.2             | 91                 | 33               | 9                | 10            | 8            | 0.45            | 3.74    |
| S113 | Jun-18     | 14   | 7.00 | 850  | n.d. | 6.97 | 16               | 0.9            | 12.7            | <0.1            | 10.0            | 124                | 35               | 10               | 10            | 8            | 0.03            | -2.20   |
| S113 | Oct-19     | 12   | 6.76 | 418  | n.d. | 6.98 | 29               | 0.6            | 12.4            | <0.1            | 10.8            | 120                | 41               | 11               | 10            | 8            | 0.03            | 1.20    |
| S113 | Jan-20     | 14   | 7.07 | 172  | 340  | 7.07 | 23               | 0.3            | 11.5            | <0.1            | 10.8            | 101                | 36               | 10               | 10            | 8            | 0.02            | 3.76    |
| S113 | May-20     | 11   | 6.91 | 274  | 234  | 6.73 | 29               | <0.1           | 15.7            | 0.8             | 12.7            | 140                | 43               | 11               | 11            | 9            | 0.03            | -4.23   |
| S113 | Oct-20     | 14   | 7.41 | 372  | n.d. | 6.7  | 21               | 0.4            | 13.4            | <0.1            | 11.2            | 109                | 35               | 9                | 11            | 7            | 0.01            | -0.06   |
| S113 | Jan-21     | 13   | 7.32 | 326  | 43   | 6.73 | 29               | 0.3            | 15.0            | 0.42            | 0.5             | 96                 | 35               | 9                | 9             | 8            | 0.21            | 2.35    |
| S113 | Apr-21     | 11   | 6.41 | 474  | 37   | 6.62 | 39               | 0.1            | 6.8             | 0.47            | 12.5            | 84                 | 33               | 9                | 9             | 5            | 0.00            | 2.25    |
| S113 | Sep-21     | 13   | 5.40 | 336  | 38   | 6.65 | 28               | 0.4            | 11.4            | 0.65            | 8.9             | 69                 | 29               | 8                | 8             | 6            | 0.05            | 4.92    |
| S113 | Jan-22     | 13   | 6.20 | 326  | 29   | 6.87 | 23               | 0.5            | 13.2            | <0.1            | 11.7            | 80                 | 35               | 9                | 10            | 8            | 0.38            | 9.18    |
| S113 | May-22     | 12   | 5.53 | 333  | 254  | 6.8  | 27               | 0.1            | 11.0            | <0.1            | 11.7            | 98                 | 32               | 9                | 10            | 7            | 0.04            | -0.53   |
| S113 | Sep-22     | 15   | 5.50 | 333  | 302  | 6.88 | 26               | <0.1           | 10.5            | <0.1            | 11.1            | 93                 | 29               | 8                | 9             | 6            | 0.08            | -3.66   |
| S113 | Jan-23     | 13   | 6.18 | 332  | n.d. | 7.30 | 22               | 0.1            | 10.0            | 0.30            | 10.7            | 95                 | 32               | 9                | 10            | 8            | n.d.            | 2.04    |
| S113 | Jun-23     | 12   | 5.47 | 333  | 239  | 7.48 | 23               | 0.3            | 11.3            | <0.1            | 14.8            | 129                | 39               | 10               | 10            | 9            | 0.01            | -2.20   |
| S113 | Sep-23     | 15   | 5.67 | 340  | 207  | 6.84 | 31               | 0.1            | 21.9            | <0.1            | 11.0            | 93                 | 36               | 9                | 9             | 6            | <0.01           | -3.28   |
| S113 | set-23     | 15   | 5.40 | 340  | 3    | 7.06 | 24               | 0.2            | 10.6            | <0.1            | 11.4            | 101                | 32               | 9                | 9             | 9            | 0.03            | -1.29   |

Table S12: Piezometer S118. Month and year of sampling, Temperature (T) in °C, pH values, Electrical Conductivity (E.C.) in  $\mu\text{S}/\text{cm}$ , redox potential (Eh) in mV, Hydraulic Head (H.I.) in m t.f.l., and concentrations of main cations and anions ( $\text{mg}\cdot\text{L}^{-1}$ ). Electroneutrality parameter in %; n.d. not determined.

| ID   | month-year | T    | pH   | E.C. | Eh   | H.I. | HCO <sub>3</sub> <sup>-</sup> | F <sup>-</sup> | Cl <sup>-</sup> | Br <sup>-</sup> | NO <sub>3</sub> <sup>-</sup> | SO <sub>4</sub> <sup>2-</sup> | Ca <sup>2+</sup> | Mg <sup>2+</sup> | Na <sup>+</sup> | K <sup>+</sup> | NH <sub>4</sub> <sup>+</sup> | Error % |
|------|------------|------|------|------|------|------|-------------------------------|----------------|-----------------|-----------------|------------------------------|-------------------------------|------------------|------------------|-----------------|----------------|------------------------------|---------|
| S118 | Sep-14     | 13   | 6.66 | 650  | n.d. | 6.16 | 85                            | 0.12           | 9.7             | <0.1            | 19.4                         | 187                           | 69               | 16               | 15              | 22             | n.d.                         | 0.76    |
| S118 | Jan-15     | n.d. | n.d. | n.d. | n.d. | 6.11 | 87                            | 0.4            | 10.7            | <0.1            | 28.4                         | 215                           | 73               | 19               | 15              | 22             | 0.07                         | -2.40   |
| S118 | May-15     | 13   | 6.16 | 556  | 100  | 6.18 | 76                            | 0.2            | 10.6            | <0.1            | 30.9                         | 225                           | 68               | 21               | 12              | 24             | 0.06                         | -3.71   |
| S118 | Sep-15     | 15   | 6.54 | 490  | 173  | 6.22 | 65                            | 0.2            | 10.0            | <0.1            | 26.8                         | 231                           | 69               | 20               | 13              | 27             | 0.10                         | -2.34   |
| S118 | Jan-17     | 11   | 6.03 | 738  | n.d. | 6.42 | 65                            | 0.1            | 8.2             | <0.1            | 24.2                         | 168                           | 60               | 19               | 12              | 22             | 0.08                         | 4.62    |
| S118 | Jan-18     | 14   | 6.36 | 360  | n.d. | 5.92 | 71                            | 0.4            | 13.4            | <0.1            | 17.7                         | 178                           | 61               | 16               | 10              | 19             | 1.36                         | -1.73   |
| S118 | Mar-19     | 12   | 6.91 | 572  | n.d. | 5.95 | 51                            | 0.3            | 11.4            | <0.1            | 26.2                         | 193                           | 55               | 19               | 11              | 21             | 0.03                         | -2.88   |
| S118 | Oct-19     | 13   | 6.67 | 293  | 111  | 6.87 | 59                            | 0.2            | 10.6            | 0.6             | 19.4                         | 163                           | 60               | 17               | 10              | 17             | 0.02                         | 2.28    |
| S118 | Jan-20     | 11   | 5.87 | 403  | 150  | 5.85 | 51                            | 0.6            | 19.3            | 0.7             | 26.7                         | 224                           | 70               | 22               | 13              | 23             | 0.02                         | -0.51   |
| S118 | May-20     | 14   | 7.89 | 683  | n.d. | 6.02 | 54                            | 0.1            | 17.4            | <0.1            | 30.1                         | 244                           | 73               | 24               | 12              | 21             | 0.04                         | -1.78   |
| S118 | Oct-20     | 12   | 7.32 | 591  | 55   | 6.15 | 63                            | <0.1           | 14.5            | 0.2             | 36.0                         | 151                           | 65               | 18               | 9               | 12             | 0.08                         | 2.77    |
| S118 | Jan-21     | 11   | 6.01 | 600  | 59   | 5.85 | 66                            | 0.3            | 11.4            | 0.7             | 26.5                         | 181                           | 68               | 22               | 9               | 14             | 0.01                         | 2.96    |
| S118 | Apr-21     | 13   | 5.70 | 634  | 35   | 4.68 | 67                            | 0.1            | 7.5             | 0.7             | 11.1                         | 160                           | 53               | 20               | 8               | 18             | 1.06                         | 3.24    |
| S118 | Sep-21     | 13   | 7.22 | 692  | 31   | 6.67 | 115                           | <0.1           | 16.5            | 0.7             | 26.0                         | 237                           | 98               | 28               | 9               | 29             | 0.06                         | 3.91    |
| S118 | Jan-22     | 12   | 6.06 | 417  | 289  | 6.65 | 79                            | 0.1            | 9.2             | <0.1            | 17.4                         | 137                           | 52               | 16               | 6               | 19             | 0.28                         | 0.25    |
| S118 | May-22     | 13   | 6.39 | 421  | 232  | 6.72 | 74                            | 0.2            | 9.5             | <0.1            | 18.3                         | 144                           | 56               | 15               | 8               | 17             | 0.32                         | 0.21    |
| S118 | Sep-22     | 13   | 7.56 | 392  | n.d. | 6.94 | 96                            | 0.3            | 6.4             | 0.4             | 15.4                         | 87                            | 50               | 6                | 4               | 17             | 0.06                         | -2.49   |
| S118 | Jan-23     | 11   | 6.70 | 609  | 201  | 6.70 | 89                            | 0.5            | 12.9            | <0.1            | 27.6                         | 228                           | 73               | 24               | 9               | 24             | 0.26                         | -3.00   |
| S118 | Jun-23     | 13   | 6.57 | 199  | 290  | 6.66 | 79                            | 0.4            | 3.4             | <0.1            | 1.7                          | 30                            | 37               | 3                | 2               | 5              | 0.31                         | 3.98    |
| S118 | Sep-23     | 14   | 6.13 | 473  | 271  | 6.94 | 61                            | 0.1            | 3.3             | <0.1            | 8.9                          | 99                            | 51               | 6                | 5               | 15             | 0.33                         | 4.93    |

Table S13: Piezometer S119. Month and year of sampling, Temperature (T) in °C, pH values, Electrical Conductivity (E.C.) in  $\mu\text{S}/\text{cm}$ , redox potential (Eh) in mV, Hydraulic Head (H.I.) in m t.f.l., and concentrations of main cations and anions ( $\text{mg}\cdot\text{L}^{-1}$ ). Electroneutrality parameter in %; n.d. not determined.

| ID    | Month-year | T    | pH   | E.C. | Eh   | H.I.  | $\text{HCO}_3^-$ | $\text{F}^-$ | $\text{Cl}^-$ | $\text{Br}^-$ | $\text{NO}_3^-$ | $\text{SO}_4^{2-}$ | $\text{Ca}^{2+}$ | $\text{Mg}^{2+}$ | $\text{Na}^+$ | $\text{K}^+$ | $\text{NH}_4^+$ | Error % |
|-------|------------|------|------|------|------|-------|------------------|--------------|---------------|---------------|-----------------|--------------------|------------------|------------------|---------------|--------------|-----------------|---------|
| S119  | Jan-14     | 13   | 6.94 | 385  | n.d. | 12.20 | 73               | 0.2          | 8.5           | <0.1          | <0.1            | 101                | 44               | 6                | 13            | 7            | <0.01           | -1.29   |
| S119  | Jan-15     | n.d. | n.d. | n.d. | n.d. | 12.80 | 54               | 0.3          | 8.5           | <0.1          | 0.4             | 109                | 40               | 7                | 13            | 7            | 0.07            | -0.89   |
| S119  | May-15     | 15   | 6.31 | 269  | 136  | 12.20 | 50               | 0.3          | 9.5           | <0.1          | 0.1             | 94                 | 33               | 7                | 10            | 8            | 0.03            | -4.40   |
| S119  | Sep-15     | 16   | 6.15 | 210  | 165  | 12.10 | 48               | 0.2          | 8.7           | <0.1          | 0.0             | 93                 | 33               | 6                | 11            | 7            | 0.08            | -2.99   |
| S 119 | Jan-17     | 10   | 6.73 | 559  | n.d. | 12.10 | 58               | 0.2          | 6.1           | <0.1          | 0.4             | 36                 | 20               | 6                | 9             | 7            | 0.05            | 4.01    |
| S 119 | Jan-18     | 13   | 6.43 | 560  | n.d. | 12.00 | 41               | 0.4          | 8.6           | <0.1          | 0.2             | 50                 | 20               | 4                | 9             | 6            | 0.28            | -2.58   |
| S 119 | Mar-19     | 12   | 7.06 | 246  | n.d. | 11.80 | 49               | 0.1          | 5.9           | <0.1          | 1.3             | 43                 | 21               | 5                | 9             | 6            | 0.02            | 2.12    |
| S 119 | Oct-19     | 15   | 6.50 | 220  | n.d. | 11.80 | 45               | 0.6          | 10.4          | 1.1           | 0.6             | 58                 | 17               | 11               | 11            | 6            | 0.08            | 2.49    |
| S119  | Jan-20     | 11   | 6.76 | 172  | 167  | 11.60 | 39               | <0.1         | 7.4           | 0.7           | 2.8             | 74                 | 31               | 1                | 10            | 6            | 0.04            | -3.86   |
| S119  | May-20     | 14   | 7.75 | 343  | n.d. | 11.60 | 36               | 0.3          | 8.9           | <0.1          | 2.0             | 64                 | 26               | 5                | 9             | 6            | 0.01            | 0.45    |
| S119  | Oct-20     | 13   | 7.32 | 296  | 34   | 11.60 | 45               | 0.3          | 11.7          | 0.5           | 1.9             | 44                 | 22               | 4                | 9             | 7            | 0.08            | -0.63   |
| S119  | Jan-21     | 12   | 6.64 | 182  | 26   | 11.50 | 49               | 0.2          | 4.9           | 0.7           | 2.1             | 30                 | 18               | 4                | 8             | 4            | 0.01            | 1.32    |
| S119  | Apr-21     | 13   | 6.30 | 192  | 40   | 11.50 | 49               | <0.1         | 4.7           | <0.1          | 1.7             | 36                 | 20               | 4                | 8             | 5            | 0.01            | 3.44    |
| S119  | Sep-21     | 14   | 6.44 | 413  | 26   | 11.60 | 46               | 0.4          | 21.2          | 0.2           | 8.7             | 154                | 81               | 7                | 10            | 7            | 0.04            | 4.91    |
| S119  | Jan-22     | 11   | 6.31 | 350  | 271  | 11.50 | 37               | <0.1         | 9.6           | <0.1          | 6.0             | 102                | 43               | 6                | 8             | 8            | 0.05            | 1.44    |
| S119  | May-22     | 14   | 6.11 | 180  | 321  | 11.60 | 35               | 0.1          | 8.2           | <0.1          | 2.4             | 66                 | 26               | 4                | 9             | 6            | 0.06            | -1.40   |
| S119  | Sep-22     | 13   | 6.39 | 198  | n.d. | 11.80 | 41               | 0.1          | 6.1           | 0.4           | 0.5             | 44                 | 19               | 3                | 8             | 6            | <0.01           | -1.34   |
| S119  | Jan-23     | 12   | 6.23 | 303  | 203  | 12.10 | 43               | <0.1         | 7.6           | <0.1          | 4.3             | 106                | 47               | 6                | 9             | 7            | <0.01           | 2.79    |
| S119  | Jun-23     | 14   | 6.36 | 220  | 203  | 11.60 | 46               | 0.1          | 7.6           | <0.1          | 1.2             | 40                 | 21               | 4                | 8             | 5            | 0.01            | 0.41    |
| S119  | Sep-23     | 15   | 6.63 | 245  | 285  | 11.70 | 46               | 0.1          | 8.4           | <0.1          | 1.9             | 62                 | 27               | 4                | 8             | 5            | 0.01            | -2.99   |

Table S14: Piezometer S120. Month and year of sampling, Temperature (T) in °C, pH values, Electrical Conductivity (E.C.) in  $\mu\text{S/cm}$ , redox potential (Eh) in mV, Hydraulic Head (H.I.) in m t.f.l., and concentrations of main cations and anions ( $\text{mg}\cdot\text{L}^{-1}$ ). Electroneutrality parameter in %; n.d. not determined.

| ID   | Month-year | T    | pH   | E.C. | Eh   | H.I.  | $\text{HCO}_3^-$ | $\text{F}^-$ | $\text{Cl}^-$ | $\text{Br}^-$ | $\text{NO}_3^-$ | $\text{SO}_4^{2-}$ | $\text{Ca}^{2+}$ | $\text{Mg}^{2+}$ | $\text{Na}^+$ | $\text{K}^+$ | $\text{NH}_4^+$ | Error % |
|------|------------|------|------|------|------|-------|------------------|--------------|---------------|---------------|-----------------|--------------------|------------------|------------------|---------------|--------------|-----------------|---------|
| S120 | Sep-14     | 12   | 5.69 | 1390 | n.d. | 15.79 | 11               | 0.4          | 10.0          | <0.1          | 3.0             | 789                | 284              | 15               | 10            | 40           | <0.01           | -0.16   |
| S120 | Jan-15     | n.d. | n.d. | n.d. | n.d. | 15.68 | 6                | 0.7          | 11.4          | <0.1          | 9.9             | 646                | 219              | 10               | 9             | 30           | 0.10            | -4.01   |
| S120 | May-15     | 15   | 4.86 | 1524 | 204  | 15.56 | 5                | 0.8          | 16.0          | <0.1          | 13.0            | 1140               | 400              | 25               | 10            | 33           | 0.06            | -2.61   |
| S120 | Sep-15     | 15   | 4.77 | 980  | 325  | 16.65 | 7                | 0.7          | 22.0          | <0.1          | 9.5             | 708                | 239              | 16               | 9             | 25           | 0.08            | -4.12   |
| S120 | Jan-17     | 11   | 5.36 | 1440 | n.d. | 16.8  | 192              | 0.2          | 8.1           | <0.1          | 8.0             | 532                | 253              | 12               | 7             | 20           | 0.12            | -0.46   |
| S120 | Jun-18     | 14   | 7.12 | 220  | n.d. | 14.93 | 11               | 0.6          | 37.0          | 0.3           | 9.6             | 1398               | 534              | 23               | 10            | 55           | 1.02            | -0.07   |
| S120 | Mar-19     | 11   | 5.73 | 1752 | n.d. | 15.00 | 16               | 0.5          | 18.3          | <0.1          | 8.9             | 1004               | 381              | 16               | 11            | 48           | 0.06            | 0.56    |
| S120 | Oct-19     | 12   | 5.40 | 1071 | n.d. | 16.57 | 12               | 0.4          | 55.9          | <0.1          | 17.6            | 540                | 214              | 11               | 8             | 16           | 0.12            | -3.64   |
| S120 | Jan-20     | 10   | 6.15 | 1264 | 222  | 14.56 | 14               | <0.1         | 27.0          | 2.2           | 8.7             | 1115               | 469              | 17               | 10            | 59           | 0.04            | 4.78    |
| S120 | May-20     | 13   | 6.9  | 1227 | n.d. | 15.68 | 11               | 1.1          | 22.1          | <0.1          | 10.4            | 685                | 244              | 12               | 8             | 19           | 0.01            | -4.04   |
| S120 | Oct-20     | 13   | 7.32 | 825  | 104  | 16.77 | 122              | 0.3          | 19.1          | 0.4           | 3.5             | 318                | 163              | 7                | 6             | 10           | 0.12            | 0.21    |
| S120 | Jan-21     | 11   | 5.45 | 1771 | 90   | n.d.  | 24               | 0.2          | 4.9           | 1.0           | 5.6             | 1200               | 413              | 14               | 10            | 56           | 0.00            | -4.05   |
| S120 | Apr-21     | 13   | 4.80 | 1581 | 47   | n.d.  | 13               | <0.1         | 4.5           | <0.1          | 11.5            | 899                | 315              | 15               | 8             | 29           | 0.12            | -3.36   |
| S120 | Sep-21     | 14   | 5.08 | 590  | 29   | 16.9  | 17               | 0.4          | 17.4          | 0.4           | 3.5             | 358                | 150              | 4                | 6             | 14           | 0.04            | 0.97    |
| S120 | Jan-22     | 11   | 5.01 | 827  | 359  | 15.50 | 24               | 0.2          | 8.2           | <0.1          | 7.6             | 381                | 149              | 7                | 7             | 17           | 0.08            | 0.56    |
| S120 | May-22     | 13   | 4.73 | 792  | 368  | 16.26 | 11               | 0.3          | 8.2           | <0.1          | 6.5             | 359                | 126              | 7                | 6             | 13           | 0.16            | -3.59   |
| S120 | Sep-22     | 12   | 4.99 | 642  | n.d. | 16.75 | 10               | 0.2          | 8.2           | 0.2           | 3.1             | 281                | 106              | 5                | 6             | 9            | 0.02            | -0.79   |
| S120 | Jan-23     | 12   | 5.00 | 1653 | 233  | 14.65 | 12               | 0.3          | 8.1           | <0.1          | 13.0            | 1041               | 355              | 17               | 12            | 44           | <0.01           | -3.65   |
| S120 | Jun-23     | 12   | 5.14 | 1103 | 253  | 15.08 | 11               | 0.2          | 10.2          | <0.1          | 7.8             | 496                | 196              | 11               | 7             | 19           | 0.01            | 2.27    |
| S120 | Sep-23     | 13   | 4.64 | 823  | 328  | 17.08 | 27               | 0.3          | 2.7           | <0.1          | 1.8             | 343                | 127              | 7                | 6             | 9            | <0.01           | -1.85   |

Table S15: Piezometer S124. Month and year of sampling, Temperature (T) in °C, pH values, Electrical Conductivity (E.C.) in  $\mu\text{S}/\text{cm}$ , redox potential (Eh) in mV, Hydraulic Head (H.I.) in m t.f.l., and concentrations of main cations and anions ( $\text{mg}\cdot\text{L}^{-1}$ ). Electroneutrality parameter in %; n.d. not determined.

| ID   | Month-year | T    | pH   | E.C. | Eh   | H.I.  | $\text{HCO}_3^-$ | $\text{F}^-$ | $\text{Cl}^-$ | $\text{Br}^-$ | $\text{NO}_3^-$ | $\text{SO}_4^{2-}$ | $\text{Ca}^{2+}$ | $\text{Mg}^{2+}$ | $\text{Na}^+$ | $\text{K}^+$ | $\text{NH}_4^+$ | Error % |
|------|------------|------|------|------|------|-------|------------------|--------------|---------------|---------------|-----------------|--------------------|------------------|------------------|---------------|--------------|-----------------|---------|
| S124 | Jan-15     | n.d. | n.d. | n.d. | n.d. | 6.15  | 29               | 0.5          | 9.8           | <0.1          | 22.4            | 164                | 48               | 9                | 12            | 20           | 1.77            | -2.86   |
| S124 | May-15     | 13   | 5.75 | 392  | 254  | 5.90  | 25               | 0.2          | 9.3           | <0.1          | 22.3            | 168                | 52               | 11               | 11            | 20           | 1.61            | 0.72    |
| S124 | Sep-15     | 13   | 5.69 | 390  | 228  | 6.49  | 22               | <0.1         | 10.0          | <0.1          | 21.7            | 177                | 49               | 10               | 12            | 21           | 1.70            | -2.72   |
| S124 | Jan-17     | 11   | 5.83 | 679  | n.d. | 6.78  | 29               | <0.1         | 7.9           | 0.6           | 20.0            | 159                | 52               | 12               | 12            | 21           | 1.83            | 4.51    |
| S124 | Jun-18     | 14   | 6.25 | 2160 | n.d. | 6.06  | 24               | 0.4          | 12.5          | 0.2           | 27.1            | 178                | 62               | 12               | 11            | 21           | 2.02            | 3.00    |
| S124 | Mar-19     | 12   | 6.83 | 572  | n.d. | 12.00 | 173              | 0.1          | 10.3          | <0.1          | 24.0            | 189                | 74               | 12               | 11            | 21           | 1.82            | -12.79  |
| S124 | Oct-19     | 13   | 6.32 | 309  | 206  | 6.65  | 26               | 0.3          | 13.3          | <0.1          | 21.4            | 176                | 59               | 11               | 10            | 12           | 1.83            | -1.27   |
| S124 | Jan-20     | 10   | 5.78 | 388  | 160  | 5.68  | 22               | 0.6          | 14.9          | 1.0           | 23.7            | 159                | 73               | 3                | 7             | 4            | 1.55            | -1.42   |
| S124 | May-20     | 14   | 7.8  | 620  | n.d. | 6.15  | 27               | 0.1          | 29.9          | <0.1          | 23.4            | 208                | 66               | 13               | 12            | 20           | 2.52            | -3.71   |
| S124 | Oct-20     | 12   | 7.32 | 491  | 59   | 6.87  | 29               | 0.1          | 12.9          | 0.4           | 16.7            | 179                | 72               | 11               | 4             | 18           | 1.86            | 4.37    |
| S124 | Jan-21     | 10   | 5.30 | 544  | 58   | 5.62  | 32               | 0.3          | 7.5           | 0.6           | 23.1            | 161                | 62               | 9                | 11            | 19           | 1.68            | 4.35    |
| S124 | Apr-21     | 13   | 5.30 | 536  | 70   | 5.90  | 23               | 0.1          | 6.8           | 1.2           | 20.7            | 168                | 56               | 12               | 10            | 19           | 1.85            | 4.11    |
| S124 | Sep-21     | 13   | 5.77 | 520  | 30   | 6.68  | 30               | 0.3          | 8.7           | 0.7           | 23.7            | 187                | 76               | 10               | 11            | 15           | 0.04            | 4.18    |
| S124 | Jan-22     | 12   | 5.42 | 507  | 320  | 6.33  | 33               | n.d.         | 10.4          | <0.1          | 22.5            | 159                | 60               | 10               | 9             | 17           | 2.02            | 3.05    |
| S124 | May-22     | 14   | 5.44 | 517  | 324  | 6.34  | 28               | <0.1         | 11.4          | <0.1          | 24.5            | 166                | 52               | 11               | 12            | 18           | 1.76            | -0.98   |
| S124 | Sep-22     | 13   | 6.24 | 486  | n.d. | 7.38  | 28               | <0.1         | 9.6           | 0.3           | 28.5            | 153                | 51               | 10               | 9             | 17           | 1.70            | -0.93   |
| S124 | Jan-23     | 12   | 5.41 | 460  | 302  | 7.65  | 24               | 0.6          | 12.7          | <0.1          | 30.1            | 185                | 59               | 12               | 10            | 19           | 1.60            | -1.99   |
| S124 | Jun-23     | 13   | 5.39 | 491  | 282  | 6.78  | 25               | <0.1         | 14.4          | <0.1          | 23.3            | 136                | 57               | 9                | 7             | 16           | 1.63            | 4.01    |
| S124 | Sep-23     | 14   | 5.42 | 464  | 258  | 7.12  | 31               | 0.1          | 11.1          | <0.1          | 20.9            | 156                | 51               | 9                | 8             | 16           | 1.33            | -3.05   |

Table S16: Piezometer S128. Month and year of sampling, Temperature (T) in °C, pH values, Electrical Conductivity (E.C.) in  $\mu\text{S}/\text{cm}$ , redox potential (Eh) in mV, Hydraulic Head (H.I.) in m t.f.l., and concentrations of main cations and anions ( $\text{mg}\cdot\text{L}^{-1}$ ). Electroneutrality parameter in %; n.d. not determined.

| ID   | Month-year | T    | pH   | E.C. | Eh   | H.I. | HCO <sub>3</sub> <sup>-</sup> | F <sup>-</sup> | Cl <sup>-</sup> | Br <sup>-</sup> | NO <sub>3</sub> <sup>-</sup> | SO <sub>4</sub> <sup>2-</sup> | Ca <sup>2+</sup> | Mg <sup>2+</sup> | Na <sup>+</sup> | K <sup>+</sup> | NH <sub>4</sub> <sup>+</sup> | Error % |
|------|------------|------|------|------|------|------|-------------------------------|----------------|-----------------|-----------------|------------------------------|-------------------------------|------------------|------------------|-----------------|----------------|------------------------------|---------|
| S128 | Jan-15     | n.d. | n.d. | n.d. | n.d. | 4.96 | 117                           | 0.4            | 7.8             | <0.1            | <0.1                         | 42                            | 43               | 4                | 11              | 6              | 0.02                         | 0.80    |
| S128 | May-15     | 13   | 6.15 | 260  | -21  | 3.85 | 72                            | 0.6            | 8.9             | <0.1            | 0.3                          | 68                            | 31               | 6                | 11              | 6              | 0.20                         | -2.90   |
| S128 | Sep-15     | 14   | 6.10 | 240  | -2   | 4.74 | 71                            | 0.3            | 6.1             | <0.1            | 0.5                          | 93                            | 38               | 7                | 13              | 7              | 0.03                         | -1.70   |
| S128 | Jan-17     | 11   | 6.17 | 361  | n.d. | 5.32 | 27                            | <0.1           | 4.8             | 0.5             | <0.1                         | 118                           | 32               | 9                | 13              | 7              | 0.30                         | 0.60    |
| S128 | Jan-18     | 13   | 6.08 | 540  | n.d. | 4.47 | 26                            | 0.6            | 6.6             | 0.1             | 1.0                          | 144                           | 45               | 9                | 12              | 7              | 0.35                         | 0.30    |
| S128 | Mar-19     | 11   | 6.85 | 397  | n.d. | 4.52 | 27                            | 0.2            | 6.2             | <0.1            | 2.1                          | 136                           | 39               | 10               | 14              | 7              | 0.07                         | 1.50    |
| S128 | Oct-19     | 14   | 6.00 | 196  | 17   | 5.10 | 15                            | 0.6            | 7.4             | <0.1            | 0.6                          | 148                           | 36               | 10               | 13              | 8              | 0.03                         | -1.60   |
| S128 | Jan-20     | 12   | 5.79 | 217  | 111  | 2.75 | 23                            | 0.8            | 11.0            | 1.5             | 1.5                          | 128                           | 32               | 6                | 21              | 13             | 0.02                         | -1.00   |
| S128 | May-20     | 12   | 7.58 | 381  | n.d. | 4.38 | 16                            | 0.6            | 10.4            | <0.1            | 0.6                          | 162                           | 41               | 12               | 16              | 10             | 0.61                         | 0.40    |
| S128 | Oct-20     | 12   | 7.32 | 407  | 36   | 5.08 | 12                            | 0.3            | 9.7             | 0.5             | 1.3                          | 145                           | 36               | 12               | 13              | 8              | 0.38                         | 0.50    |
| S128 | Jan-21     | 11   | 6.37 | 398  | 40   | 3.75 | 32                            | <0.1           | 2.7             | 0.8             | 5.9                          | 131                           | 46               | 10               | 10              | 4              | <0.01                        | 3.30    |
| S128 | Apr-21     | 11   | 5.70 | 374  | 36   | 4.12 | 27                            | <0.1           | 2.3             | 1.2             | 0.1                          | 107                           | 31               | 9                | 12              | 6              | 0.17                         | 4.90    |
| S128 | Sep-21     | 14   | 5.85 | 472  | 31   | 5.34 | 41                            | 0.1            | 10.0            | 0.4             | 0.2                          | 132                           | 10               | 13               | 8               | 1              | <0.01                        | -3.18   |
| S128 | Jan-22     | 12   | 5.54 | 385  | 169  | 5.00 | 38                            | <0.1           | 6.6             | <0.1            | 0.5                          | 130                           | 35               | 10               | 13              | 6              | 0.36                         | -2.80   |
| S128 | May-22     | 12   | 5.60 | 386  | 163  | 5.51 | 17                            | 0.1            | 5.5             | <0.1            | <0.1                         | 132                           | 32               | 10               | 12              | 9              | 0.40                         | -0.10   |
| S128 | Sep-22     | 13   | 5.83 | 395  | n.d. | 6.30 | 18                            | <0.1           | 5.1             | 0.4             | <0.1                         | 141                           | 35               | 11               | 13              | 8              | 0.93                         | 0.60    |
| S128 | Jan-23     | 12   | 6.01 | 412  | 97   | 5.04 | 40                            | 0.3            | 5.0             | 1.0             | <0.1                         | 143                           | 37               | 11               | 13              | 7              | 1.60                         | -3.20   |
| S128 | Jun-23     | 12   | 6.90 | 386  | 156  | 4.68 | 16                            | 0.1            | 4.5             | <0.1            | 0.8                          | 156                           | 48               | 10               | 12              | 7              | <0.01                        | 2.90    |
| S128 | Sep-23     | 13   | 5.45 | 399  | 198  | 5.45 | 24                            | 0.2            | 4.5             | <0.1            | 0.3                          | 160                           | 38               | 11               | 13              | 7              | 0.03                         | -3.90   |

Table S17: Surface water VIV. Month and year of sampling, Temperature (T) in °C, pH values, Electrical Conductivity (E.C.) in  $\mu\text{S}/\text{cm}$ , redox potential (Eh) in mV, and concentrations of main cations and anions ( $\text{mg}\cdot\text{L}^{-1}$ ). Electroneutrality parameter in %; n.d. not determined.

| ID  | Month-year | T  | pH   | E.C. | Eh   | HCO <sub>3</sub> <sup>-</sup> | F <sup>-</sup> | Cl <sup>-</sup> | Br <sup>-</sup> | NO <sub>3</sub> <sup>-</sup> | SO <sub>4</sub> <sup>2-</sup> | Ca <sup>2+</sup> | Mg <sup>2+</sup> | Na <sup>+</sup> | K <sup>+</sup> | NH <sub>4</sub> <sup>+</sup> | Error % |
|-----|------------|----|------|------|------|-------------------------------|----------------|-----------------|-----------------|------------------------------|-------------------------------|------------------|------------------|-----------------|----------------|------------------------------|---------|
| VIV | Jun-18     | 17 | 7.90 | 520  | n.d. | 96                            | 0.2            | 11.4            | <0.1            | 4.8                          | 102                           | 66               | 6                | 9               | 8              | 0.05                         | 3.30    |
| VIV | Mar-19     | 9  | 7.16 | 489  | n.d. | 100                           | 0.2            | 11.7            | 0.9             | 3.2                          | 125                           | 77               | 7                | 9               | 8              | 0.07                         | 3.84    |
| VIV | Oct-19     | 15 | 7.61 | 206  | 95   | 32                            | 0.2            | 37.5            | <0.1            | 1.4                          | 66                            | 50               | 4                | 5               | 5              | 0.06                         | 2.89    |
| VIV | Jan-20     | 7  | 6.59 | 497  | 63   | 120                           | <0.1           | 14.6            | 0.9             | 3.5                          | 191                           | 108              | 9                | 9               | 10             | 0.38                         | 2.83    |
| VIV | May-20     | 16 | 8.02 | 393  | n.d. | 85                            | 0.5            | 15.3            | <0.1            | 1.7                          | 94                            | 52               | 4                | 8               | 6              | 0.18                         | -4.67   |
| VIV | Oct-20     | 14 | 7.32 | 299  | -21  | 92                            | 0.1            | 12.3            | 0.5             | 3.5                          | 54                            | 44               | 3                | 6               | 5              | 0.23                         | -3.13   |
| VIV | Jan-21     | 7  | 6.71 | 657  | 17   | 111                           | 0.3            | 10.7            | 0.1             | 4.5                          | 201                           | 106              | 8                | 8               | 9              | 0.22                         | 1.36    |
| VIV | Apr-21     | 13 | 6.60 | 365  | 34   | 69                            | 0.1            | 7.2             | 1.4             | 2.6                          | 70                            | 51               | 0                | 6               | 5              | 0.22                         | 2.29    |
| VIV | Sep-21     | 15 | 7.70 | 283  | 23   | 122                           | <0.1           | 18.3            | <0.1            | 1.0                          | 95                            | 75               | 5                | 8               | 7              | 0.04                         | 1.28    |
| VIV | Jan-22     | 7  | 7.35 | 501  | 173  | 118                           | 0.2            | 10.2            | <0.1            | 5.7                          | 129                           | 79               | 6                | 8               | 8              | 0.46                         | -0.62   |
| VIV | May-22     | 20 | 8.27 | 461  | 222  | 119                           | 0.3            | 9.6             | <0.1            | 1.3                          | 100                           | 66               | 5                | 8               | 7              | 0.10                         | -1.14   |
| VIV | Sep-22     | 17 | 7.44 | 377  | n.d. | 123                           | 0.2            | 8.2             | <0.1            | 1.7                          | 80                            | 60               | 5                | 8               | 7              | 0.05                         | -0.10   |
| VIV | Jan-23     | 8  | 5.88 | 442  | 96   | 110                           | 0.2            | 9.2             | 0.5             | 2.2                          | 98                            | 68               | 6                | 7               | 6              | 0.03                         | 2.95    |
| VIV | Jun-23     | 18 | 7.14 | 334  | 284  | 115                           | 0.2            | 6.1             | <0.1            | 1.9                          | 73                            | 64               | 2                | 5               | 5              | 0.32                         | 1.79    |
| VIV | Sep-23     | 17 | 7.21 | 339  | 80   | 119                           | 0.2            | 9.5             | <0.1            | 1.9                          | 63                            | 52               | 4                | 6               | 7              | 0.02                         | -2.85   |



Table S18: Surface water VAL. Month and year of sampling, Temperature (T) in °C, pH values, Electrical Conductivity (E.C.) in  $\mu\text{S}/\text{cm}$ , redox potential (Eh) in mV, and concentrations of main cations and anions ( $\text{mg}\cdot\text{L}^{-1}$ ). Electroneutrality parameter in %; n.d. not determined.

| ID  | Month-year | T  | pH   | E.C. | Eh   | $\text{HCO}_3^-$ | $\text{F}^-$ | $\text{Cl}^-$ | $\text{Br}^-$ | $\text{NO}_3^-$ | $\text{SO}_4^{2-}$ | $\text{Ca}^{2+}$ | $\text{Mg}^{2+}$ | $\text{Na}^+$ | $\text{K}^+$ | $\text{NH}_4^+$ | Error % |
|-----|------------|----|------|------|------|------------------|--------------|---------------|---------------|-----------------|--------------------|------------------|------------------|---------------|--------------|-----------------|---------|
| VAL | Sep-17     | 4  | 8.66 | 379  | n.d. | 60               | 0.1          | 9.4           | <0.1          | 0.6             | 20                 | 25               | 3                | 6             | 4            | 0.09            | 4.31    |
| VAL | Jun-18     | 17 | 7.00 | 130  | n.d. | 49               | 0.8          | 15.8          | <0.1          | 2.4             | 161                | 66               | 6                | 9             | 5            | 0.33            | -3.92   |
| VAL | Mar-19     | 9  | 7.54 | 333  | n.d. | 63               | 0.2          | 9.6           | <0.1          | 1.7             | 67                 | 41               | 4                | 7             | 4            | 0.06            | 1.62    |
| VAL | Oct-19     | 14 | 7.32 | 153  | 38   | 93               | 0.2          | 6.0           | <0.1          | 0.9             | 20                 | 32               | 3                | 6             | 4            | 0.03            | 1.74    |
| VAL | Jan-20     | 7  | 6.04 | 214  | 134  | 43               | 0.3          | 15.5          | 0.5           | 2.5             | 90                 | 45               | 5                | 8             | 4            | 0.05            | 1.14    |
| VAL | May-20     | 18 | 7.67 | 230  | n.d. | 55               | 0.4          | 10.6          | <0.1          | 1.4             | 37                 | 28               | 3                | 7             | 6            | 0.04            | 2.50    |
| VAL | Oct-20     | 13 | 7.32 | 272  | 38   | 89               | 0.3          | 12.6          | 0.4           | 1.1             | 37                 | 34               | 4                | 6             | 7            | 0.05            | -2.78   |
| VAL | Jan-21     | 5  | 6.13 | 370  | 51   | 56               | 0.1          | 7.6           | 0.4           | 2.6             | 68                 | 42               | 3                | 7             | 3            | 0.05            | 1.71    |
| VAL | Apr-21     | 16 | 6.30 | 223  | 30   | 59               | <0.1         | 7.4           | 2.5           | 1.1             | 29                 | 28               | 1                | 7             | 1            | 0.06            | -1.08   |
| VAL | Sep-21     | 16 | 7.05 | 520  | 29   | 154              | 0.4          | 11.1          | 0.1           | 1.9             | 50                 | 70               | 4                | 7             | 5            | 0.01            | 3.56    |
| VAL | Jan-22     | 5  | 8.15 | 206  | 190  | 72               | 0.1          | 8.7           | <0.1          | 1.9             | 33                 | 28               | 3                | 6             | 4            | 0.10            | -2.98   |
| VAL | May-22     | 13 | 6.65 | 450  | 284  | 188              | 0.4          | 10.6          | <0.1          | 3.4             | 60                 | 70               | 5                | 7             | 6            | 0.19            | -3.84   |
| VAL | Sep-22     | 9  | 6.59 | 193  | n.d. | 74               | 0.2          | 7.0           | <0.1          | 1.8             | 19                 | 24               | 3                | 7             | 5            | 0.03            | -0.31   |
| VAL | Jan-23     | 7  | 7.75 | 240  | 215  | 81               | 0.2          | 7.0           | 0.4           | 2.2             | 34                 | 33               | 4                | 6             | 4            | 0.04            | 0.90    |
| VAL | Jun-23     | 17 | 7.07 | 380  | 220  | 95               | 0.2          | 7.1           | <0.1          | 5.3             | 86                 | 60               | 4                | 7             | 5            | <0.01           | 1.07    |
| VAL | Sep-23     | 13 | 7.15 | 195  | 223  | 82               | 0.1          | 7.4           | <0.1          | 1.2             | 16                 | 28               | 2                | 5             | 4            | 0.95            | 1.61    |

Table S19: Spring GRN. Month and year of sampling, Temperature (T) in °C, pH values, Electrical Conductivity (E.C.) in  $\mu\text{S}/\text{cm}$ , redox potential (Eh) in mV, and concentrations of main cations and anions ( $\text{mg}\cdot\text{L}^{-1}$ ). Electroneutrality parameter in %; n.d. not determined.

| ID  | Month-year | T  | pH   | E.C. | Eh   | $\text{HCO}_3^-$ | $\text{F}^-$ | Cl   | $\text{Br}^-$ | $\text{NO}_3^-$ | $\text{SO}_4^{2-}$ | $\text{Ca}^{2+}$ | $\text{Mg}^{2+}$ | $\text{Na}^+$ | $\text{K}^+$ | $\text{NH}_4^+$ | Error % |
|-----|------------|----|------|------|------|------------------|--------------|------|---------------|-----------------|--------------------|------------------|------------------|---------------|--------------|-----------------|---------|
| GRN | Sep-14     | 15 | 7.36 | 168  | n.d. | 49               | 0.1          | 7.3  | <0.1          | 0.5             | 5                  | 13               | 2                | 6             | 3            | <0.01           | -0.09   |
| GRN | Jan-15     | 14 | 5.6  | n.d. | n.d. | 30               | 0.1          | 7.3  | <0.1          | 0.4             | 6                  | 10               | 1                | 5             | 3            | 0.09            | 4.20    |
| GRN | May-15     | 15 | 7.41 | 81   | 118  | 33               | 0.1          | 7.2  | <0.1          | <0.1            | 6                  | 7                | 1                | 9             | 3            | 0.06            | 2.01    |
| GRN | Sep-15     | 16 | 7.20 | 70   | 125  | 40               | 0.1          | 8.7  | <0.1          | 0.4             | 6                  | 10               | 1                | 6             | 3            | 0.10            | -4.35   |
| GRN | Jan-17     | 4  | 7.73 | 301  | n.d. | 44               | 0.1          | 6.9  | <0.1          | 0.6             | 6                  | 12               | 1                | 6             | 3            | 0.09            | 0.93    |
| GRN | Jun-18     | 11 | 6.92 | 390  | n.d. | 40               | 0.2          | 5.8  | <0.1          | 1.8             | 5                  | 12               | 2                | 5             | 3            | 0.04            | 4.77    |
| GRN | Mar-19     | 8  | 8.16 | 383  | n.d. | 32               | 0.1          | 6.3  | <0.1          | 0.4             | 6                  | 10               | 1                | 5             | 3            | 0.03            | 4.25    |
| GRN | Oct-19     | 14 | 6.62 | 72   | 162  | 67               | 0.5          | 11.1 | <0.1          | 0.7             | 7                  | 20               | 3                | 7             | 4            | 0.05            | 1.60    |
| GRN | Jan-20     | 6  | 7.42 | 81   | 185  | 35               | 0.9          | 10.0 | 0.2           | 0.1             | 14                 | 13               | 2                | 6             | 4            | 0.05            | -1.68   |
| GRN | May-20     | 15 | 7.63 | 236  | n.d. | 44               | 0.2          | 9.4  | <0.1          | 0.9             | 12                 | 13               | 2                | 6             | 4            | 0.05            | -3.28   |
| GRN | Jan-21     | 5  | 6.89 | 116  | 10.7 | 39               | <0.1         | 6.8  | <0.1          | 1.2             | 5                  | 11               | 2                | 5             | 1            | 0.01            | -0.43   |
| GRN | Apr-21     | 13 | 6.40 | 100  | 52   | 52               | <0.1         | 5.5  | 0.25          | 0.2             | 4                  | 14               | 2                | 6             | 3            | 0.12            | 3.10    |
| GRN | Sep-21     | 16 | 7.08 | 119  | 23   | 63               | <0.1         | 6.2  | <0.1          | 0.8             | 4                  | 18               | 2                | 6             | 3            | <0.01           | 4.26    |
| GRN | Jan-22     | 6  | 7.01 | 94   | 224  | 40               | 0.1          | 5.9  | <0.1          | 0.6             | 5                  | 10               | 1                | 5             | 3            | 0.06            | -2.12   |
| GRN | May-22     | 8  | 6.63 | 116  | 273  | 51               | 0.1          | 7.9  | <0.1          | <0.1            | 9                  | 13               | 2                | 6             | 4            | 0.10            | -3.47   |
| GRN | Sep-22     | 12 | 7.14 | 140  | n.d. | 77               | 0.1          | 5.8  | <0.1          | 2.0             | 5                  | 18               | 2                | 6             | 5            | 0.12            | -3.93   |
| GRN | Jan-23     | 6  | 6.60 | 95   | 197  | 44               | 0.0          | 9.4  | <0.1          | 1.1             | 6                  | 17               | 2                | 5             | 2            | <0.01           | 4.38    |
| GRN | Jun-23     | 16 | 6.43 | 102  | 192  | 50               | 0.1          | 6.2  | <0.1          | 0.6             | 5                  | 16               | 1                | 5             | 3            | 0.05            | 2.66    |
| GRN | Sep-23     | 15 | 6.22 | 111  | 226  | 58               | 0.1          | 7.2  | <0.1          | 0.7             | 3                  | 15               | 2                | 5             | 3            | <0.01           | -2.66   |

Table S20: Spring SR8. Month and year of sampling, Temperature (T) in °C, pH values, Electrical Conductivity (E.C.) in  $\mu\text{S}/\text{cm}$ , redox potential (Eh) in mV, Hydraulic Head (H.I.) in m, and concentrations of main cations and anions ( $\text{mg}\cdot\text{L}^{-1}$ ). Electroneutrality parameter in %; n.d. not determined.

| ID  | Month-years | T  | pH   | E.C. | Eh   | $\text{HCO}_3^-$ | $\text{F}^-$ | Cl   | $\text{Br}^-$ | $\text{NO}_3^-$ | $\text{SO}_4^{2-}$ | $\text{Ca}^{2+}$ | $\text{Mg}^{2+}$ | $\text{Na}^+$ | $\text{K}^+$ | $\text{NH}_4^+$ | Error % |
|-----|-------------|----|------|------|------|------------------|--------------|------|---------------|-----------------|--------------------|------------------|------------------|---------------|--------------|-----------------|---------|
| SR8 | Sep-14      | 14 | 7.20 | 352  | n.d. | 72               | 0.2          | 11.1 | <0.1          | 0.4             | 90                 | 47               | 5                | 10            | 4            | 0.01            | -1.27   |
| SR8 | Jan-15      | 12 | 6.90 | n.d. | n.d. | 54               | 0.4          | 18.6 | <0.1          | 2.1             | 119                | 54               | 5                | 11            | 5            | 0.09            | -3.21   |
| SR8 | May-15      | 12 | 7.28 | 351  | 25   | 61               | 0.5          | 14.3 | <0.1          | 2.4             | 137                | 66               | 6                | 8             | 4            | 0.09            | -0.72   |
| SR8 | Sep-15      | 16 | 7.70 | 250  | 147  | 98               | 0.2          | 10.4 | <0.1          | 0.9             | 78                 | 52               | 5                | 8             | 4            | 0.12            | -1.63   |
| SR8 | Jan-17      | 5  | 8.36 | 757  | n.d. | 176              | 0.1          | 6.1  | <0.1          | 3.6             | 26                 | 62               | 5                | 7             | 4            | 0.52            | 3.34    |
| SR8 | Jun-18      | 17 | 7.00 | 130  | n.d. | 38               | 0.6          | 14.0 | <0.1          | 1.8             | 167                | 70               | 7                | 8             | 7            | 0.55            | 1.43    |
| SR8 | Mar-19      | 9  | 7.12 | 716  | n.d. | 100              | 0.4          | 14.9 | <0.1          | 3.1             | 135                | 74               | 7                | 8             | 5            | 0.06            | -2.09   |
| SR8 | Oct-19      | 14 | 7.71 | 288  | 63   | 172              | 0.3          | 7.6  | 0.1           | 1.0             | 56                 | 75               | 6                | 8             | 4            | 0.02            | 4.40    |
| SR8 | Jan-20      | 9  | 5.77 | 359  | 116  | 24               | 1.5          | 74.0 | n.d.          | 2.9             | 179                | 89               | 9                | 12            | 5            | 0.27            | -4.12   |
| SR8 | May-20      | 13 | 8.43 | 441  | n.d. | 71               | 0.4          | 17.6 | <0.1          | 2.0             | 105                | 58               | 6                | 9             | 5            | 0.01            | 0.03    |
| SR8 | Oct-20      | 13 | 7.32 | 571  | 10   | 192              | 1.5          | 28.7 | 0.5           | 9.9             | 115                | 102              | 8                | 11            | 8            | 0.04            | -0.99   |
| SR8 | Jan-21      | 8  | 6.49 | 566  | 33   | 59               | 0.7          | 16.1 | 0.6           | 5.1             | 196                | 89               | 8                | 10            | 8            | 0.14            | 0.64    |
| SR8 | Apr-21      | 11 | 6.60 | 402  | 32   | 90               | 0.1          | 13.3 | 0.3           | 1.9             | 80                 | 59               | 6                | 9             | 4            | 0.10            | 4.97    |
| SR8 | Sep-21      | 16 | 7.83 | 357  | 27   | 162              | 0.2          | 8.3  | 0.2           | 1.5             | 41                 | 62               | 4                | 7             | 4            | 0.21            | 1.20    |
| SR8 | Jan-22      | 6  | 7.57 | 390  | 263  | 146              | 0.2          | 10.9 | <0.1          | 3.7             | 59                 | 62               | 6                | 7             | 4            | 0.33            | -0.17   |
| SR8 | May-22      | 13 | 7.06 | 390  | 150  | 204              | 0.3          | 10.3 | <0.1          | 2.6             | 31                 | 63               | 6                | 8             | 5            | 0.14            | -3.64   |
| SR8 | Sep-22      | 12 | 6.76 | 246  | n.d. | 81               | 0.3          | 9.0  | <0.1          | 5.3             | 35                 | 33               | 3                | 8             | 5            | 0.19            | -1.83   |
| SR8 | Jan-23      | 8  | 7.20 | 542  | 162  | 195              | 0.3          | 7.2  | 0.2           | 6.1             | 87                 | 94               | 7                | 7             | 9            | 0.01            | 4.17    |
| SR8 | Jun-23      | 14 | 7.02 | 756  | 188  | 193              | 0.2          | 6.9  | <0.1          | 12.7            | 210                | 119              | 17               | 9             | 8            | 0.01            | 0.11    |
| SR8 | Sep-23      | 18 | 6.63 | 688  | 215  | 189              | 0.3          | 9.6  | <0.1          | 7.3             | 141                | 111              | 7                | 13            | 9            | 0.01            | 3.79    |

Table S21: Spring SR10a. Month and year of sampling, Temperature (T) in °C, pH values, Electrical Conductivity (E.C.) in  $\mu\text{S}/\text{cm}$ , redox potential (Eh) in mV, and concentrations of main cations and anions ( $\text{mg}\cdot\text{L}^{-1}$ ). Electroneutrality parameter in %; n.d. not determined.

| ID    | month-year | T  | pH   | E.C. | Eh   | $\text{HCO}_3^-$ | $\text{F}^-$ | $\text{Cl}^-$ | $\text{Br}^-$ | $\text{NO}_3^-$ | $\text{SO}_4^{2-}$ | $\text{Ca}^{2+}$ | $\text{Mg}^{2+}$ | $\text{Na}^+$ | $\text{K}^+$ | $\text{NH}_4^+$ | Error % |
|-------|------------|----|------|------|------|------------------|--------------|---------------|---------------|-----------------|--------------------|------------------|------------------|---------------|--------------|-----------------|---------|
| SR10A | Sep-14     | 13 | 6.85 | 290  | n.d. | 22               | 0.2          | 10.0          | <0.1          | 1.5             | 73                 | 22               | 7                | 10            | 6            | <0.01           | 1.74    |
| SR10A | Jan-15     | 13 | 7.18 | n.d. | n.d. | 21               | 0.3          | 11.4          | <0.1          | 2.9             | 70                 | 17               | 6                | 12            | 6            | 0.08            | -4.02   |
| SR10A | May-15     | 12 | 6.01 | 213  | 175  | 23               | 0.3          | 11.0          | <0.1          | 3.0             | 75                 | 25               | 7                | 9             | 6            | 0.02            | 0.84    |
| SR10A | Sep-15     | 11 | 6.41 | 170  | 145  | 22               | 0.1          | 15.3          | <0.1          | 2.2             | 68                 | 20               | 6                | 10            | 11           | 0.06            | -0.31   |
| SR10A | Jan-17     | 10 | 6.30 | 201  | n.d. | 34               | 0.1          | 8.7           | 0.4           | 2.8             | 48                 | 14               | 5                | 12            | 5            | 0.05            | -2.24   |
| SR10A | Jun-18     | 15 | 7.5  | 530  | n.d. | 27               | 0.4          | 9.9           | 0.1           | 5.4             | 57                 | 19               | 6                | 8             | 5            | 0.02            | -2.08   |
| SR10A | Mar-19     | 11 | 7.10 | 422  | n.d. | 32               | 0.2          | 7.7           | <0.1          | 2.9             | 51                 | 19               | 6                | 8             | 5            | <0.01           | 2.22    |
| SR10A | Oct-19     | 14 | 6.49 | 109  | 120  | 27               | 0.3          | 9.6           | <0.1          | 2.5             | 51                 | 20               | 6                | 9             | 5            | 0.02            | 4.14    |
| SR10A | Jan-20     | 9  | 7.22 | 158  | 216  | 35               | 0.3          | 15.9          | <0.1          | 5.2             | 59                 | 33               | 2                | 11            | 7            | 0.03            | 2.41    |
| SR10A | May-20     | 13 | 7.62 | 231  | n.d. | 24               | 0.2          | 15.3          | <0.1          | 8.4             | 62                 | 23               | 6                | 9             | 6            | 0.04            | -1.65   |
| SR10A | Oct-20     | 12 | 7.32 | 198  | 34   | 27               | 0.3          | 12.1          | 0.1           | 2.9             | 58                 | 29               | 5                | 5             | 4            | 0.04            | 2.14    |
| SR10A | Jan-21     | 10 | 6.59 | 200  | 27   | 51               | <0.1         | 5.9           | <0.1          | 3.1             | 36                 | 19               | 6                | 9             | 4            | 0.03            | 3.20    |
| SR10A | Apr-21     | 13 | 6.10 | 222  | 49   | 30               | 0.2          | 6.8           | 0.5           | 4.5             | 62                 | 19               | 6                | 9             | 5            | 0.02            | -2.41   |
| SR10A | Sep-21     | 13 | 7.70 | 203  | 27   | 43               | <0.1         | 7.4           | <0.1          | 4.0             | 50                 | 25               | 6                | 8             | 6            | 0.06            | 4.67    |
| SR10A | Jan-22     | 11 | 5.96 | 183  | 248  | 29               | 0.1          | 7.3           | <0.1          | 4.0             | 47                 | 17               | 5                | 5             | 9            | 0.08            | -1.46   |
| SR10A | May-22     | 7  | 6.09 | 182  | 291  | 33               | 0.2          | 8.9           | <0.1          | 2.5             | 43                 | 15               | 5                | 8             | 5            | 0.06            | -4.56   |
| SR10A | Sep-22     | 12 | 6.28 | 170  | n.d. | 28               | 0.2          | 6.9           | 0.3           | 1.6             | 35                 | 14               | 4                | 7             | 5            | 0.02            | 1.91    |
| SR10A | Jan-23     | 11 | 5.90 | 176  | 226  | 24               | 0.2          | 11.0          | <0.1          | 4.3             | 43                 | 16               | 4                | 7             | 4            | <0.01           | -3.50   |
| SR10A | Jun-23     | 14 | 6.29 | 173  | 197  | 31               | 0.2          | 7.9           | <0.1          | 3.5             | 37                 | 18               | 5                | 4             | 2            | 0.01            | -0.88   |
| SR10A | Sep-23     | 14 | 6.09 | 170  | 240  | 34               | 0.1          | 4.2           | <0.1          | 1.0             | 30                 | 13               | 4                | 8             | 4            | <0.01           | 3.37    |

Table S22: Superficial water GIT. Month and year of sampling, Temperature (T) in °C, pH values, Electrical Conductivity (E.C.) in  $\mu\text{S}/\text{cm}$ , redox potential (Eh) in mV, and concentrations of main cations and anions ( $\text{mg}\cdot\text{L}^{-1}$ ). Electroneutrality parameter in %; n.d. not determined.

| ID  | Month-year | T    | pH   | TDS  | $\text{HCO}_3^-$ | $\text{F}^-$ | $\text{Cl}^-$ | $\text{NO}_3^-$ | $\text{SO}_4^{2-}$ | $\text{Ca}^{2+}$ | $\text{Mg}^{2+}$ | $\text{Na}^+$ | $\text{K}^+$ | $\text{NH}_4^+$ | Err   |
|-----|------------|------|------|------|------------------|--------------|---------------|-----------------|--------------------|------------------|------------------|---------------|--------------|-----------------|-------|
| GIT | Jan-13     | 15.0 | 6.30 | 959  | 120              | 1.0          | 17.0          | 0.9             | 557                | 211              | 29               | 13            | 10           | 0.05            | -1.05 |
| GIT | May-13     | 15.5 | 5.80 | 788  | 74               | 0.7          | 10.0          | 0.1             | 475                | 191              | 17               | 11            | 10           | 0.02            | 0.98  |
| GIT | Feb-14     | 14.2 | 6.06 | 1036 | 151              | 0.7          | 16.0          | 0.1             | 574                | 238              | 33               | 12            | 12           | 0.20            | 1.71  |
| GIT | Sep-14     | 15.0 | 6.18 | 816  | 94               | 0.8          | 11.8          | 0.1             | 477                | 194              | 18               | 11            | 10           | 0.04            | 0.32  |
| GIT | Apr-15     | 14.5 | 6.20 | 911  | 115              | 0.6          | 10.7          | 0.2             | 542                | 202              | 23               | 9             | 8            | 0.05            | -3.32 |
| GIT | Oct-15     | 15.0 | 6.19 | 852  | 111              | 0.4          | 13.7          | 0.2             | 478                | 206              | 21               | 11            | 9            | 1.17            | 2.75  |
| GIT | May-16     | 15.0 | 5.98 | 917  | 125              | 0.5          | 13.0          | 0.4             | 512                | 220              | 24               | 12            | 10           | 0.40            | 2.58  |
| GIT | Oct-16     | 12.6 | 5.83 | 849  | 120              | 0.5          | 8.0           | 0.1             | 475                | 198              | 22               | 15            | 10           | 0.19            | 2.01  |
| GIT | Apr-17     | 14.9 | 6.37 | 871  | 192              | 1.1          | 10.0          | 0.2             | 428                | 192              | 23               | 14            | 11           | 0.20            | 0.15  |
| GIT | Jun-18     | 17.5 | 6.47 | 854  | 78               | 2.0          | 13.0          | 0.1             | 530                | 180              | 26               | 12            | 13           | 0.04            | -2.85 |
| GIT | mar-19     | 14.5 | 6.58 | 917  | 149              | 0.8          | 12.4          | 0.1             | 511                | 192              | 27               | 13            | 11           | 1.28            | -2.81 |
| GIT | Oct-19     | 17.0 | 6.60 | 824  | 92               | 0.1          | 12.0          | 0.1             | 498                | 180              | 21               | 11            | 9            | 0.09            | -3.17 |
| GIT | Jan-20     | 13.0 | 6.41 | 1028 | 112              | 1.6          | 24.0          | 1.0             | 586                | 243              | 34               | 14            | 11           | 0.24            | 3.67  |
| GIT | May-20     | 15.4 | 6.52 | 941  | 104              | 1.2          | 25.1          | 0.1             | 558                | 206              | 23               | 12            | 8            | 3.52            | -3.30 |
| GIT | Oct-20     | 16.0 | 6.28 | 757  | 114              | 1.2          | 22.3          | 0.2             | 404                | 181              | 21               | 8             | 5            | 0.51            | 1.67  |
| GIT | Apr-21     | 15.2 | 5.90 | 752  | 67               | 1.4          | 6.4           | 0.1             | 458                | 176              | 24               | 10            | 9            | 0.55            | 2.37  |
| GIT | Sept-21    | 14.8 | 6.34 | 844  | 151              | 1.2          | 34.0          | 1.4             | 434                | 184              | 19               | 13            | 5            | 0.40            | 3.31  |
| GIT | Dic-21     | 13.8 | 6.03 | 550  | 118              | 0.7          | 20.7          | 0.1             | 411                | 194              | 18               | 12            | 12           | 0.1             | 4.04  |
| GIT | Jan-22     | 13.8 | 6.07 | 585  | 165              | 0.8          | 8.4           | 0.2             | 411                | 177              | 18               | 10            | 11           | 2.4             | -1.40 |
| GIT | Mag-22     | 15.0 | 6.19 | 531  | 180              | 0.9          | 11.3          | 0.1             | 338                | 167              | 17               | 10            | 9            | 3.2             | 1.00  |
| GIT | Sep-22     | 19.4 | 6.37 | 563  | 182              | 1.2          | 7.9           | <0.1            | 372                | 168              | 18               | 10            | 8            | 2.82            | -2.01 |
| GIT | Jan-23     | 14.0 | 6.10 | 611  | 151              | 0.7          | 1.6           | 1.6             | 456                | 179              | 23               | 10            | 8            | 2.77            | 0.12  |
| GIT | May-23     | 16.3 | 6.10 | 591  | 140              | 0.8          | 8.9           | 0.3             | 441                | 183              | 23               | 11            | 9            | 1.02            | 0.30  |
| GIT | Jun-23     | 16.2 | 6.20 | 837  | 161              | 0.6          | 15.5          | 0.3             | 434                | 184              | 22               | 11            | 8            | 0.04            | -1.60 |
| GIT | Sep-23     | 16.6 | 6.10 | 864  | 146              | 0.6          | 10.0          | <0.1            | 481                | 182              | 23               | 11            | 10           | 0.13            | -3.83 |
