# Supplementary material
Source: MDPI journal article supplement (https://www.mdpi.com/2073-4441/16/9/1210)
Supplement: s1 [file s1]

## Supplementary Material S2- Temporal variation of As, Hg, Sb, Al and Fe in the piezometer, surface and spring waters

Table S23: Piezometer S1N: concentrations of As, Hg, Sb, Al and Fe (µg/L); n.d. = not determined

| ID    | Month-year | As  | Hg   | Sb   | Al   | Fe   |
|-------|------------|-----|------|------|------|------|
| S1N   | Feb-13     | 1.9 | 4.9  | 3.3  | n.d. | n.d. |
| S1N   | May-13     | 1.3 | 1.5  | 3.8  | n.d. | n.d. |
| S1N   | Sep-13     | 5.8 | 6.2  | 6.5  | n.d. | n.d. |
| S1N   | Jan-14     | 3.2 | 6.3  | 16.7 | n.d. | n.d. |
| S1N   | May-14     | 2.5 | 0.9  | 8.6  | n.d. | n.d. |
| S1N   | Sep-14     | 2.5 | 4.3  | 4.5  | n.d. | n.d. |
| S1N   | Jan-15     | 2.1 | 0.1  | 4.7  | n.d. | n.d. |
| S1N   | May-15     | 1.3 | 1.2  | 6.1  | n.d. | n.d. |
| S1N   | Sep-15     | 2.7 | 22.9 | 7.0  | n.d. | n.d. |
| S 1 N | Jan-16     | 0.5 | 0.3  | 0.7  | n.d. | n.d. |
| S 1 N | May-16     | 1.1 | 0.5  | 5.8  | n.d. | n.d. |
| S 1 N | Oct-16     | 1.3 | 0.2  | 2.9  | n.d. | n.d. |
| S 1 N | Jan-17     | 1.4 | 6.4  | 1.9  | n.d. | n.d. |
| S 1 N | May-17     | 0.9 | <0.1 | 4.9  | n.d. | n.d. |
| S1N   | Sep-17     | 1.9 | 0.3  | 1.6  | n.d. | n.d. |
| S1N   | Jan-18     | 0.7 | 0.1  | 1.4  | n.d. | n.d. |
| S1N   | Jun-18     | 1.0 | 1.0  | 2.7  | n.d. | n.d. |
| S1N   | Nov-18     | 0.5 | 0.8  | 1.3  | n.d. | n.d. |
| S1N   | Mar-19     | 0.3 | 1.2  | 0.3  | n.d. | n.d. |
| S1N   | May-19     | 0.3 | 0.2  | 1.1  | n.d. | n.d. |
| S1N   | Oct-19     | 2.3 | 9.1  | 6.9  | n.d. | n.d. |
| S1N   | Jan-20     | 0.6 | <0.1 | 1.2  | n.d. | n.d. |
| S1N   | May-20     | 0.9 | <0.1 | 3.5  | n.d. | n.d. |
| S1N   | Oct-20     | 1.6 | 1.3  | 3.6  | n.d. | n.d. |
| S1N   | Jan-21     | 0.5 | <0.1 | 0.4  | n.d. | n.d. |
| S1N   | Apr-21     | 1.1 | 0.1  | 2.5  | n.d. | n.d. |
| S1N   | Sep-21     | 2.8 | 1.0  | 0.3  | n.d. | n.d. |
| S1N   | Jan-22     | 1.0 | 2.9  | 7.3  | 263  | 7.4  |
| S1N   | May-22     | 2.4 | 3.2  | 14.2 | 180  | 5.3  |
| S1N   | Sep-22     | 5.5 | 15.7 | 12.6 | 3877 | 10   |
| S1N   | Jan-23     | 0.8 | 3.2  | 0.7  | 196  | 85   |
| S1N   | Jun-23     | 2.9 | 3.8  | 5.8  | 2660 | 9.9  |
| S1N   | Sep-23     | 2.7 | 3.0  | 13.7 | 40   | 3.4  |

Table S14: Piezometer S6N: concentrations of As, Hg, Sb, Al and Fe (µg/L); n.d. = not determined

| ID  | Month-year | As   | Hg    | Sb   | Al   | Fe   |
|-----|------------|------|-------|------|------|------|
| S6N | Feb-13     | 11.5 | 240.0 | 31.0 | n.d. | n.d. |
| S6N | May-13     | 14.9 | 695.0 | 31.4 | n.d. | n.d. |
| S6N | Sep-13     | 6.8  | 121.0 | 30.5 | n.d. | n.d. |
| S6N | Jan-14     | 14.4 | 471.0 | 28.2 | n.d. | n.d. |
| S6N | May-14     | 4.1  | 124.0 | 16.5 | n.d. | n.d. |
| S6N | Sep-14     | 5.5  | 151.0 | 25.7 | n.d. | n.d. |
| S6N | Jan-15     | 9.2  | 188.0 | 25.2 | n.d. | n.d. |
| S6N | May-15     | 7.1  | 239.0 | 28.4 | n.d. | n.d. |
| S6N | Sep-15     | 5.0  | 4.6   | 36.6 | n.d. | n.d. |
| S6N | Jan-16     | 6.0  | 307.0 | 25.3 | n.d. | n.d. |
| S6N | May-16     | 5.8  | 280.0 | 33.5 | n.d. | n.d. |
| S6N | Oct-16     | 4.8  | 273.0 | 26.5 | n.d. | n.d. |
| S6N | Jan-17     | 5.0  | 318.0 | 25.4 | n.d. | n.d. |
| S6N | May-17     | 3.9  | 407.0 | 20.5 | n.d. | n.d. |
| S6N | Sep-17     | 3.5  | 247.0 | 24.7 | n.d. | n.d. |
| S6N | Jan-18     | 4.7  | 301.0 | 17.1 | n.d. | n.d. |
| S6N | Jun-18     | 3.8  | 270.7 | 20.7 | n.d. | n.d. |
| S6N | Nov-18     | 5.2  | 357.0 | 21.1 | n.d. | n.d. |
| S6N | Mar-19     | 3.7  | 251.0 | 12.5 | n.d. | n.d. |
| S6N | May-19     | 3.5  | 330.0 | 18.0 | n.d. | n.d. |
| S6N | Oct-19     | 2.6  | 213.0 | 25.7 | n.d. | n.d. |
| S6N | Jan-20     | 4.5  | 390.0 | 18.1 | n.d. | n.d. |
| S6N | May-20     | 3.7  | 378.0 | 20.0 | n.d. | n.d. |
| S6N | Oct-20     | 4.7  | 268.0 | 29.8 | n.d. | n.d. |
| S6N | Jan-21     | 4.9  | 271.0 | 16.2 | n.d. | n.d. |
| S6N | Apr-21     | 3.8  | 338.0 | 18.2 | n.d. | n.d. |
| S6N | Sep-21     | 1.8  | 81.4  | 8.8  | 13   | 472  |
| S6N | Jan-22     | 4.2  | 296.9 | 19.7 | 22   | 3.5  |
| S6N | May-22     | 1.3  | 135.3 | 12.0 | 15   | 30   |
| S6N | Sep-22     | 0.5  | 99.9  | 15.2 | 13   | 30   |
| S6N | Jan-23     | 4.6  | 274.9 | 18.1 | 49   | 10   |
| S6N | Jun-23     | 4.4  | 223.0 | 22.3 | 27   | 3.8  |
| S6N | Sep-23     | 0.9  | 88.7  | 12.2 | 16   | 61   |

Table S25: Piezometer S2EST: concentrations of As, Hg, Sb, Al and Fe (µg/L); n.d. = not determined

| ID      | Month-year | As   | Hg    | Sb   | Al   | Fe   |
|---------|------------|------|-------|------|------|------|
| S2 est. | Feb-13     | 1.9  | 433.0 | 0.1  | n.d. | n.d. |
| S2 est. | May-13     | 1.3  | 126.0 | 0.6  | n.d. | n.d. |
| S2 est. | Sep-13     | 2.2  | 3.0   | 0.1  | n.d. | n.d. |
| S2 est. | Jan-14     | 12.8 | 456.0 | 0.1  | n.d. | n.d. |
| S2 est. | May-14     | 0.9  | 7.6   | 1.4  | n.d. | n.d. |
| S2 est. | Sep-14     | 0.8  | 55.4  | 0.2  | n.d. | n.d. |
| S2 est. | Jan-15     | 0.5  | 14.3  | 1.0  | n.d. | n.d. |
| S2 est. | May-15     | 1.4  | 68.4  | 0.8  | n.d. | n.d. |
| S2 est. | Sep-15     | 2.2  | 217.0 | 0.2  | n.d. | n.d. |
| S2 est. | May-16     | 1.8  | 109.0 | 0.9  | n.d. | n.d. |
| S2 est. | Oct-16     | 1.5  | 72.2  | n.d. | n.d. | n.d. |
| S2 est. | Jan-17     | 1.1  | 61.8  | 0.1  | n.d. | n.d. |
| S2 est. | May-17     | 0.7  | 39.4  | 1.5  | n.d. | n.d. |
| S2 est. | Sep-17     | 0.7  | 55.2  | 0.5  | n.d. | n.d. |
| S2 est. | Jan-18     | 1.3  | 38.7  | 1.3  | n.d. | n.d. |
| S2 est. | Jun-18     | 1.1  | 65.8  | 0.4  | n.d. | n.d. |
| S2 est. | Nov-18     | 1.3  | 90.6  | 0.1  | n.d. | n.d. |
| S2 est. | Mar-19     | 0.9  | 32.6  | 0.1  | n.d. | n.d. |
| S2 est. | May-19     | 1.2  | 52.9  | 0.1  | n.d. | n.d. |
| S2 est. | Oct-19     | 1.3  | 45.9  | 0.1  | n.d. | n.d. |
| S2 est. | Jan-20     | 0.7  | 33.5  | 0.1  | n.d. | n.d. |
| S2 est. | May-20     | 1.3  | 56.6  | 0.1  | n.d. | n.d. |
| S2 est. | Oct-20     | 0.9  | 12.8  | 0.7  | n.d. | n.d. |
| S2 est. | Jan-21     | 0.8  | 19.7  | 0.1  | n.d. | n.d. |
| S2 est. | Apr-21     | 1.2  | 73.0  | 0.1  | n.d. | n.d. |
| S2 est. | Sep-21     | 1.5  | 104.5 | 0.1  | 324  | 5.8  |
| S2 est. | Jan-22     | 1.6  | 89.4  | 0.1  | 577  | 7.3  |
| S2 est. | May-22     | 1.5  | 39.7  | 0.5  | 113  | 15   |
| S2 est. | Sep-22     | 1.6  | 64.3  | 0.1  | 271  | 4.0  |
| S2 est. | Jan-23     | 1.3  | 28.3  | 0.2  | 229  | 9.6  |
| S2 est. | Sep-23     | 1.0  | 40.0  | 0.1  | 86   | 9.5  |

Table S26: Piezometer S42 concentrations of As, Hg, Sb, Al and Fe (µg/L); n.d. = not determined

| ID  | Month-Year | As  | Hg   | Sb    | Al   | Fe   |
|-----|------------|-----|------|-------|------|------|
| S42 | May-13     | 0.7 | 23.1 | 0.6   | n.d. | n.d. |
| S42 | Sep-13     | 0.7 | 24.9 | < 0.1 | n.d. | n.d. |
| S42 | Jan-14     | 1.0 | 25.9 | 0.9   | n.d. | n.d. |
| S42 | May-14     | 0.7 | 11.2 | 0.2   | n.d. | n.d. |
| S42 | Sep-14     | 0.7 | 22.6 | 0.3   | n.d. | n.d. |
| S42 | Jan-15     | 0.9 | 18.8 | 0.5   | n.d. | n.d. |
| S42 | May-15     | 0.8 | 18.2 | 0.6   | n.d. | n.d. |
| S42 | Sep-15     | 0.6 | 0.8  | 4.1   | n.d. | n.d. |
| S42 | Jan-16     | 0.7 | 16.9 | 1.2   | n.d. | n.d. |
| S42 | May-16     | 1.0 | 16.4 | 0.5   | n.d. | n.d. |
| S42 | Oct-16     | 0.7 | 15.0 | 0.2   | n.d. | n.d. |
| S42 | Jan-17     | 0.5 | 15.0 | <0.1  | n.d. | n.d. |
| S42 | May-17     | 0.5 | 18.0 | 0.9   | n.d. | n.d. |
| S42 | Sep-17     | 0.2 | 11.7 | 0.5   | n.d. | n.d. |
| S42 | Jan-18     | 0.5 | 10.0 | 1.0   | n.d. | n.d. |
| S42 | Jun-18     | 0.5 | 11.7 | 0.5   | n.d. | n.d. |
| S42 | Nov-18     | 0.5 | 5.3  | 1.0   | n.d. | n.d. |
| S42 | Mar-19     | 0.6 | 13.4 | 0.3   | n.d. | n.d. |
| S42 | May-19     | 0.1 | 0.1  | 7.7   | n.d. | n.d. |
| S42 | Oct-19     | 0.8 | 6.7  | 2.2   | n.d. | n.d. |
| S42 | Jan-20     | 0.5 | 6.5  | 0.4   | n.d. | n.d. |
| S42 | May-20     | 0.7 | 11.9 | 0.3   | n.d. | n.d. |
| S42 | Oct-20     | 0.5 | 3.0  | 1.0   | n.d. | n.d. |
| S42 | Jan-21     | 0.8 | 9.6  | 0.3   | n.d. | n.d. |
| S42 | Apr-21     | 0.6 | 10.7 | 0.3   | n.d. | n.d. |
| S42 | Sep-21     | 0.7 | 8.5  | 0.3   | 44   | 5.0  |
| S42 | Jan-22     | 0.8 | 9.5  | 0.2   | 2.5  | 1.0  |
| S42 | May-22     | 0.7 | 7.9  | 0.2   | 6.0  | 6.7  |
| S42 | Sep-22     | 0.7 | 11.1 | 0.7   | 4.3  | 2.0  |
| S42 | Jan-23     | 0.8 | 9.2  | 1.2   | 86   | 64   |
| S42 | Jun-23     | 1.6 | 15.9 | 8.9   | 42   | 15   |
| S42 | Sep-23     | 0.7 | 13.5 | 0.4   | 5.6  | 2.9  |

Table S27: Piezometer S60: concentrations of As, Hg, and Sb (µg/L).

| ID  | Months-<br>years | As  | Hg   | Sb   |
|-----|------------------|-----|------|------|
| S60 | May-13           | 1.1 | 49.7 | 0.2  |
| S60 | Sep-13           | 1   | 52.5 | 0.3  |
| S60 | Jan-14           | 1.8 | 67.4 | 0.3  |
| S60 | May-14           | 1.4 | 35.1 | 0.2  |
| S60 | Sep-14           | 1.5 | 51.9 | 0.3  |
| S60 | Jan-15           | 1.5 | 50.1 | 0.2  |
| S60 | May-15           | 1.3 | 38.3 | 0.5  |
| S60 | Sep-15           | 1   | 98.7 | 0.3  |
| S60 | Jan-16           | 1.3 | 57.8 | 0.1  |
| S60 | May-16           | 1.6 | 46.2 | 0.4  |
| S60 | Oct-16           | 1.0 | 50.3 | 0.2  |
| S60 | Jan-17           | 1.1 | 35.9 | <0.1 |
| S60 | May-17           | 1.3 | 41.8 | 0.6  |
| S60 | Sep-17           | 1   | 23.9 | 0.2  |
| S60 | Jan-18           | 1.1 | 43.6 | 0.3  |
| S60 | Jun-18           | 1.0 | 33.7 | 2.7  |
| S60 | Nov-18           | 1.3 | 35.3 | 0.2  |
| S60 | Mar-19           | 1.1 | 35.7 | 0.1  |
| S60 | May-19           | 1   | 32.5 | 0.1  |
| S60 | Oct-19           | 1.4 | 36.4 | 2.2  |
| S60 | Jan-20           | 1.4 | 25.1 | 0.2  |
| S60 | May-20           | 1.6 | 29.4 | 0.2  |
| S60 | Oct-20           | 1.5 | 23.5 | 0.3  |
| S60 | Jan-21           | 1.6 | 25.3 | 0.2  |

Table S28: Piezometer S101: concentrations of As, Hg, Sb, Al and Fe (µg/L); n.d.= not determined

| ID    | Month-year | As  | Hg    | Sb   | Al   | Fe   |
|-------|------------|-----|-------|------|------|------|
| S101  | Feb-13     | 2.4 | 0.2   | 0.7  | n.d. | n.d. |
| S101  | May-13     | 2.3 | 0.1   | 0.3  | n.d. | n.d. |
| S101  | Sep-13     | 1.5 | < 0.1 | 0.2  | n.d. | n.d. |
| S101  | Jan-14     | 1.5 | 0.5   | 0.3  | n.d. | n.d. |
| S101  | May-14     | 1.9 | <0.1  | 0.6  | n.d. | n.d. |
| S101  | Sep-14     | 1.9 | 0.1   | 0.4  | n.d. | n.d. |
| S101  | Jan-15     | 2.4 | 0.2   | 0.4  | n.d. | n.d. |
| S101  | May-15     | 1.7 | 0.5   | 0.6  | n.d. | n.d. |
| S101  | Sep-15     | 2.0 | 0.8   | 0.2  | n.d. | n.d. |
| S 101 | Jan-16     | 1.7 | 0.4   | 0.4  | n.d. | n.d. |
| S 101 | May-16     | 2.2 | 1.0   | 2.0  | n.d. | n.d. |
| S 101 | Oct-16     | 2.4 | 0.2   | 1.2  | n.d. | n.d. |
| S 101 | Jan-17     | 0.3 | 1.6   | <0.1 | n.d. | n.d. |
| S101  | May-17     | 1.5 | 0.9   | 0.5  | n.d. | n.d. |
| S101  | Sep-17     | 1.3 | 0.3   | 0.4  | n.d. | n.d. |
| S101  | Jan-18     | 1.6 | 0.5   | 0.4  | n.d. | n.d. |
| S101  | Jun-18     | 1.3 | 0.1   | 0.9  | n.d. | n.d. |
| S101  | Nov-18     | 1.5 | <0.1  | 0.7  | n.d. | n.d. |
| S101  | Mar-19     | 1.5 | 1.1   | 0.4  | n.d. | n.d. |
| S101  | May-19     | 1.3 | 1.3   | 0.5  | n.d. | n.d. |
| S101  | Oct-19     | 1.2 | 1.6   | 0.4  | n.d. | n.d. |
| S101  | Jan-20     | 0.9 | <0.1  | 0.3  | n.d. | n.d. |
| S101  | May-20     | 1.0 | 1.6   | 0.4  | n.d. | n.d. |
| S101  | Oct-20     | 0.7 | 2.9   | 0.4  | n.d. | n.d. |
| S101  | Apr-21     | 0.8 | <0.1  | 0.3  | n.d. | n.d. |
| S101  | Sep-21     | 0.9 | <0.1  | 0.2  | 2.9  | 0.9  |
| S101  | Jan-22     | 0.2 | 0.3   | 0.1  | 74   | 6.0  |
| S101  | May-22     | 1.1 | 0.5   | 0.4  | 13   | 21   |
| S101  | Sep-22     | 1.2 | <0.1  | 0.3  | 5.5  | 1.5  |
| S101  | Jan-23     | 1.8 | <0.1  | 10.3 | 0.1  | <0.1 |
| S101  | Jun-23     | 1.0 | 0.5   | 0.3  | 12   | 1.1  |
| S101  | Sep-23     | 1.0 | <0.1  | 0.4  | 7    | 2.6  |

Table S29: Piezometer S106: concentrations of As, Hg, Sb, Al and Fe (µg/L); n.d.= not determined

| ID   | Month-year | As    | Hg   | Sb    | Al   | Fe   |
|------|------------|-------|------|-------|------|------|
| S106 | Feb-13     | 0.6   | 19.2 | 0.4   | n.d. | n.d. |
| S106 | May-13     | 0.4   | 29.7 | 0.2   | n.d. | n.d. |
| S106 | Sep-13     | 1.2   | 72.3 | < 0.1 | n.d. | n.d. |
| S106 | Jan-14     | 1.3   | 70.1 | 7.2   | n.d. | n.d. |
| S106 | May-14     | 1.4   | 10.3 | 7.3   | n.d. | n.d. |
| S106 | Sep-14     | 0.7   | 13.6 | 3.9   | n.d. | n.d. |
| S106 | Jan-15     | 1.6   | 0.3  | 9.5   | n.d. | n.d. |
| S106 | May-15     | 0.9   | 8.3  | 8.9   | n.d. | n.d. |
| S106 | Sep-15     | 1.2   | 31.5 | 6.6   | n.d. | n.d. |
| S106 | Jan-16     | 1.6   | 2.9  | 8.1   | n.d. | n.d. |
| S106 | May-16     | 1.0   | 15.2 | 3.5   | n.d. | n.d. |
| S106 | Oct-16     | 2.7   | n.d. | 12.9  | n.d. | n.d. |
| S106 | Jan-17     | 2.0   | 0.6  | 10.1  | n.d. | n.d. |
| S106 | Sep-17     | <0.1  | 29.9 | <0.1  | n.d. | n.d. |
| S106 | Jan-18     | 0.4   | 65.9 | 0.3   | n.d. | n.d. |
| S106 | Jun-18     | 0.2   | 30.2 | 0.1   | n.d. | n.d. |
| S106 | Nov-18     | 0.3   | 52.1 | 0.1   | n.d. | n.d. |
| S106 | Mar-19     | 0.3   | 39.9 | 0.2   | n.d. | n.d. |
| S106 | May-19     | < 0.1 | 38.4 | < 0.1 | n.d. | n.d. |
| S106 | Oct-19     | 0.3   | 31.8 | 0.1   | n.d. | n.d. |
| S106 | Jan-20     | 0.1   | 25.3 | 0.1   | n.d. | n.d. |
| S106 | May-20     | 0.2   | 34.8 | 0.1   | n.d. | n.d. |
| S106 | Oct-20     | 0.3   | 30.0 | 0.2   | n.d. | n.d. |
| S106 | Jan-21     | 0.3   | 44.9 | < 0.1 | n.d. | n.d. |
| S106 | Apr-21     | 0.2   | 16.9 | 0.2   | n.d. | n.d. |
| S106 | Sep-21     | 0.2   | 26.4 | 0.1   | 21   | 3.9  |
| S106 | Sep-23     | 0.2   | 27.3 | 0.3   | 23   | 6.0  |

Table S30: Piezometer S110: concentrations of As, Hg, Sb, Al and Fe (µg/L); n.d.= not determined

| ID    | Month-year | As  | Hg   | Sb   | Al   | Fe   |
|-------|------------|-----|------|------|------|------|
| S108  | Feb-13     | 3.4 | 0.1  | 0.5  | n.d. | n.d. |
| S108  | May-13     | 1.4 | 0.3  | 0.3  | n.d. | n.d. |
| S108  | Sep-13     | 2.0 | 0.4  | 0.5  | n.d. | n.d. |
| S108  | Jan-14     | 2.8 | 2.2  | 0.2  | n.d. | n.d. |
| S108  | May-14     | 2.3 | 0.2  | 0.3  | n.d. | n.d. |
| S108  | Sep-14     | 2.3 | 0.4  | 0.4  | n.d. | n.d. |
| S108  | Jan-15     | 2.6 | 0.1  | 0.4  | n.d. | n.d. |
| S108  | May-15     | 1.4 | 1.3  | 0.4  | n.d. | n.d. |
| S108  | Sep-15     | 2.0 | 0.6  | 0.2  | n.d. | n.d. |
| S108  | Jan-16     | 1.7 | 1.1  | 0.1  | n.d. | n.d. |
| S108  | May-16     | 2.0 | 1.3  | 0.4  | n.d. | n.d. |
| S108  | Oct-16     | 1.8 | n.d. | 0.2  | n.d. | n.d. |
| S 108 | Jan-17     | 2.4 | 0.6  | 0.2  | n.d. | n.d. |
| S 108 | May-17     | 0.6 | <0.1 | 0.5  | n.d. | n.d. |
| S 108 | Sep-17     | 0.8 | 0.2  | <0.1 | n.d. | n.d. |
| S 108 | Jan-18     | 1.7 | 0.1  | 0.3  | n.d. | n.d. |
| S 108 | Jun-18     | 1.5 | 0.1  | 0.2  | n.d. | n.d. |
| S 108 | Nov-18     | 1.6 | 1.9  | 0.1  | n.d. | n.d. |
| S 108 | Mar-19     | 1.8 | 4.4  | 0.1  | n.d. | n.d. |
| S 108 | May-19     | 1.2 | 3.5  | <0.1 | n.d. | n.d. |
| S 108 | Oct-19     | 2.1 | 5.6  | 0.1  | n.d. | n.d. |
| S108  | Jan-20     | 1.6 | 4.5  | 0.1  | n.d. | n.d. |
| S108  | May-20     | 1.8 | 5.9  | 0.1  | n.d. | n.d. |
| S108  | Oct-20     | 1.7 | 0.3  | 0.2  | n.d. | n.d. |
| S108  | Jan-21     | 1.9 | <0.1 | 0.3  | n.d. | n.d. |
| S108  | Apr-21     | 1.4 | <0.1 | 0.2  | n.d. | n.d. |
| S108  | Sep-21     | 2.2 | 5.1  | 0.1  | 7.8  | 13   |
| S108  | Jan-22     | 2.4 | 7.5  | 0.1  | 34   | 36   |
| S108  | May-22     | 8.6 | 37.7 | 1.2  | 48   | 63   |
| S108  | Sep-22     | 2.3 | 6.5  | 0.1  | 13   | 6.5  |
| S108  | Jan-23     | 2.0 | 3.1  | 0.1  | 9.8  | 5.6  |
| S108  | Jun-23     | 1.8 | 4.4  | 0.1  | 12   | 3.2  |
| S108  | Sep-23     | 2.1 | 4.2  | 0.1  | 10   | 5.1  |



Table S31: Piezometer S109: concentrations of As, Hg, Sb, Al and Fe (µg/L); n.d.= not determined

| ID   | Month-year | As  | Hg    | Sb   | Al   | Fe   |
|------|------------|-----|-------|------|------|------|
| S109 | Feb-13     | 1.2 | <0.1  | 2.3  | n.d. | n.d. |
| S109 | May-13     | 1.3 | 0.1   | 2.2  | n.d. | n.d. |
| S109 | Sep-13     | 1.2 | 0.4   | 0.3  | n.d. | n.d. |
| S109 | Jan-14     | 1.2 | 0.5   | 0.1  | n.d. | n.d. |
| S109 | May-14     | 1.2 | 0.1   | 0.1  | n.d. | n.d. |
| S109 | Sep-14     | 1.1 | 0.2   | 0.2  | n.d. | n.d. |
| S109 | Jan-15     | 1.4 | 0.4   | 0.2  | n.d. | n.d. |
| S109 | May-15     | 1   | 0.6   | 0.3  | n.d. | n.d. |
| S109 | Sep-15     | 1.2 | 1.1   | 0.1  | n.d. | n.d. |
| S109 | Jan-16     | 1.2 | 0.3   | 0.1  | n.d. | n.d. |
| S109 | May-16     | 1.2 | 1.7   | 0.5  | n.d. | n.d. |
| S109 | Oct-16     | 1.7 | 0.2   | 2.3  | n.d. | n.d. |
| S109 | Jan-17     | 1.1 | 0.6   | <0.1 | n.d. | n.d. |
| S109 | May-17     | 1   | <0.1  | 0.2  | n.d. | n.d. |
| S109 | Sep-17     | 0.8 | 0.3   | <0.1 | n.d. | n.d. |
| S109 | Jan-18     | 1.1 | 0.4   | 0.2  | n.d. | n.d. |
| S109 | Jun-18     | 1.2 | 1.0   | 2.9  | n.d. | n.d. |
| S109 | Nov-18     | 1.2 | 1.9   | 0.1  | n.d. | n.d. |
| S109 | Mar-19     | 1.2 | 1     | 0.1  | n.d. | n.d. |
| S109 | May-19     | 0.7 | 0.9   | <0.1 | n.d. | n.d. |
| S109 | Oct-19     | 1.4 | 1.6   | 0.1  | n.d. | n.d. |
| S109 | Jan-20     | 1.1 | < 0.1 | 0.1  | n.d. | n.d. |
| S109 | May-20     | 1.2 | 2.6   | 0.1  | n.d. | n.d. |
| S109 | Oct-20     | 1.2 | 0.2   | 0.1  | n.d. | n.d. |
| S109 | Jan-21     | 1.2 | 0.5   | 0.2  | n.d. | n.d. |
| S109 | Apr-21     | 1.2 | <0.1  | <0.1 | n.d. | n.d. |
| S109 | Sep-21     | 1.2 | 0.2   | 0.1  | 15.9 | 4.9  |
| S109 | Jan-22     | 1.5 | 0.2   | 0.1  | 16   | 18   |
| S109 | May-22     | 1.4 | 0.2   | 1.7  | 4.9  | 3.0  |
| S109 | Sep-22     | 1.2 | 0.1   | 0.4  | 4.7  | 3.0  |
| S109 | Jan-23     | 1.4 | 0.2   | 0.2  | 69   | 20   |
| S109 | Jun-23     | 1.3 | 0.5   | 0.1  | 9    | 1.3  |
| S109 | Sep-23     | 1.4 | <0.1  | 0.1  | 5    | 2.2  |

Table S32: Piezometer S111: concentrations of As, Hg, Sb, Al and Fe (µg/L); n.d.= no determined

| ID    | Month-year | As  | Hg    | Sb   | Al   | Fe   |
|-------|------------|-----|-------|------|------|------|
| S111  | Feb-13     | 2.2 | <0.1  | 2.5  | n.d. | n.d. |
| S111  | May-13     | 6.7 | 0.1   | 1.1  | n.d. | n.d. |
| S111  | Sep-13     | 3.3 | 0.2   | 0.6  | n.d. | n.d. |
| S111  | Jan-14     | 4.2 | 0.5   | 0.9  | n.d. | n.d. |
| S111  | May-14     | 2.5 | 0.1   | 0.1  | n.d. | n.d. |
| S111  | Sep-14     | 1.1 | 0.1   | 0.4  | n.d. | n.d. |
| S111  | Jan-15     | 1.1 | 0.3   | 0.4  | n.d. | n.d. |
| S111  | May-15     | 0.7 | 0.2   | 0.3  | n.d. | n.d. |
| S111  | Sep-15     | 2.9 | 0.2   | 0.1  | n.d. | n.d. |
| S111  | Jan-16     | 0.5 | 0.1   | <0.1 | n.d. | n.d. |
| S111  | May-16     | 1.0 | 0.8   | 1.5  | n.d. | n.d. |
| S111  | Oct-16     | 0.9 | 0.2   | n.d. | n.d. | n.d. |
| S 111 | Jan-17     | 1.0 | 0.5   | <0.1 | n.d. | n.d. |
| S 111 | May-17     | 0.9 | <0.1  | 0.3  | n.d. | n.d. |
| S 111 | Sep-17     | 1.0 | 0.3   | 0.5  | n.d. | n.d. |
| S 111 | Jan-18     | 1.3 | 0.2   | 0.3  | n.d. | n.d. |
| S 111 | Jun-18     | 1.2 | 0.4   | 1.7  | n.d. | n.d. |
| S 111 | Nov-18     | 1.6 | 0.6   | 0.2  | n.d. | n.d. |
| S 111 | Mar-19     | 1.4 | 1.0   | 0.1  | n.d. | n.d. |
| S 111 | May-19     | 1.5 | 0.7   | 0.2  | n.d. | n.d. |
| S 111 | Oct-19     | 2.2 | 2.6   | 0.2  | n.d. | n.d. |
| S111  | Jan-20     | 1.7 | < 0.1 | 0.3  | n.d. | n.d. |
| S111  | May-20     | 2.3 | 2.5   | 0.1  | n.d. | n.d. |
| S111  | Oct-20     | 2.3 | 0.8   | 0.3  | n.d. | n.d. |
| S111  | Jan-21     | 1.9 | 0.3   | 0.3  | n.d. | n.d. |
| S111  | Apr-21     | 2.2 | <0.1  | 0.3  | n.d. | n.d. |
| S111  | Sep-21     | 2.6 | 0.7   | 0.5  | 27   | 15   |
| S111  | Jan-22     | 6.3 | 1.1   | 0.2  | 6.4  | 604  |
| S111  | May-22     | 2.6 | 2.1   | 0.2  | 7.2  | 7.0  |
| S111  | Sep-22     | 3.0 | 0.1   | 0.3  | 8.0  | 5.3  |
| S111  | Jan-23     | 3.0 | 0.1   | 0.2  | 12   | 39   |
| S111  | Jun-23     | 2.7 | 1.1   | 0.4  | 12   | 2.7  |
| S111  | Sep-23     | 2.9 | <0.1  | 0.4  | 7.9  | 3.9  |

Table S33: Piezometer S113: concentrations of As, Hg, Sb, Al and Fe (µg/L); n.d.= not determined

| ID   | Month-year | As  | Hg   | Sb    | Al   | Fe   |
|------|------------|-----|------|-------|------|------|
| S113 | Feb-13     | 0.9 | 17.6 | 0.3   | n.d. | n.d. |
| S113 | May-13     | 1.3 | 21.0 | 0.1   | n.d. | n.d. |
| S113 | Sep-13     | 1.2 | 41.0 | 0.1   | n.d. | n.d. |
| S113 | Jan-14     | 1.5 | 92.8 | 0.1   | n.d. | n.d. |
| S113 | May-14     | 1.1 | 31.4 | 0.1   | n.d. | n.d. |
| S113 | Sep-14     | 1.4 | 55.1 | 0.1   | n.d. | n.d. |
| S113 | Jan-15     | 1.2 | 13.1 | 0.3   | n.d. | n.d. |
| S113 | May-15     | 1.1 | 37.7 | 0.2   | n.d. | n.d. |
| S113 | Sep-15     | 1.3 | 98.1 | 0.1   | n.d. | n.d. |
| S113 | Jan-16     | 1.1 | 64.0 | <0.1  | n.d. | n.d. |
| S113 | May-16     | 1.4 | 50.4 | 0.9   | n.d. | n.d. |
| S113 | Oct-16     | 1.2 | 58.4 | <0.1  | n.d. | n.d. |
| S113 | Jan-17     | 0.9 | 50.4 | <0.1  | n.d. | n.d. |
| S113 | May-17     | 1.0 | 54.3 | 0.3   | n.d. | n.d. |
| S113 | Sep-17     | 0.9 | 44.7 | 0.4   | n.d. | n.d. |
| S113 | Jan-18     | 1.2 | 26.7 | 1.2   | n.d. | n.d. |
| S113 | Jun-18     | 0.9 | 22.0 | 0.7   | n.d. | n.d. |
| S113 | Nov-18     | 1.1 | 46.6 | <0.1  | n.d. | n.d. |
| S113 | Mar-19     | 1.2 | 52.2 | < 0.1 | n.d. | n.d. |
| S113 | May-19     | 0.6 | 52.6 | < 0.1 | n.d. | n.d. |
| S113 | Oct-19     | 1.5 | 53.8 | < 0.1 | n.d. | n.d. |
| S113 | Jan-20     | 1.1 | 52.1 | 0.3   | n.d. | n.d. |
| S113 | May-20     | 1.2 | 68.0 | < 0.1 | n.d. | n.d. |
| S113 | Oct-20     | 1.1 | 9.6  | 0.1   | n.d. | n.d. |
| S113 | Jan-21     | 1.2 | 19.1 | 0.2   | n.d. | n.d. |
| S113 | Apr-21     | 1.2 | 13.6 | < 0.1 | n.d. | n.d. |
| S113 | Sep-21     | 1.2 | 66.2 | <0.1  | 33   | 4.0  |
| S113 | Jan-22     | 1.4 | 82.1 | <0.1  | 30   | 13   |
| S113 | May-22     | 1.4 | 63.9 | 0.4   | 40   | 3.0  |
| S113 | Sep-22     | 1.4 | 49.0 | <0.1  | 36   | 5.9  |
| S113 | Jan-23     | 1.3 | 24.9 | 0.1   | 28   | 5.6  |
| S113 | Jun-23     | 1.2 | 20.0 | 0.2   | 35   | 1.9  |
| S113 | Sep-23     | 1.2 | 45.3 | <0.1  | 35   | 3.4  |

Table S34: Piezometer S118: concentrations of As, Hg, Sb, Al and Fe (µg/L); in. n.d.= not determined

| ID   | month-year | As   | Hg   | Sb   | Al   | Fe   |
|------|------------|------|------|------|------|------|
| S118 | Sep-14     | 0.9  | 24.9 | 0.3  | n.d. | n.d. |
| S118 | Jan-15     | 1.3  | 27.5 | 0.1  | n.d. | n.d. |
| S118 | May-15     | 1.3  | 29.6 | 0.2  | n.d. | n.d. |
| S118 | Sep-15     | 1.5  | 64.3 | 0.1  | n.d. | n.d. |
| S118 | Jan-16     | 1.4  | 46.3 | 0.2  | n.d. | n.d. |
| S118 | May-16     | 1.9  | 39.0 | 0.5  | n.d. | n.d. |
| S118 | Oct-16     | 1.6  | 32.6 | n.d. | n.d. | n.d. |
| S118 | Jan-17     | 1.7  | 27.7 | <0.1 | n.d. | n.d. |
| S118 | May-17     | 1.5  | 41.2 | 1.4  | n.d. | n.d. |
| S118 | Sep-17     | 1.5  | 24.5 | 0.3  | n.d. | n.d. |
| S118 | Jan-18     | 2.2  | 31.7 | 1.7  | n.d. | n.d. |
| S118 | Jun-18     | 2.3  | 3.0  | 1.3  | n.d. | n.d. |
| S118 | Nov-18     | 2    | 25.2 | 0.5  | n.d. | n.d. |
| S118 | Mar-19     | 1.6  | 31.4 | 0.2  | n.d. | n.d. |
| S118 | May-19     | 1.3  | 33.6 | 0.4  | n.d. | n.d. |
| S118 | Oct-19     | 2.1  | 14.9 | 0.6  | n.d. | n.d. |
| S118 | Jan-20     | 1.6  | 17.0 | 0.5  | n.d. | n.d. |
| S118 | May-20     | 1.8  | 27.8 | 0.6  | n.d. | n.d. |
| S118 | Oct-20     | 3.7  | 15.3 | 2.7  | n.d. | n.d. |
| S118 | Jan-21     | 1.7  | 25.1 | 0.8  | n.d. | n.d. |
| S118 | Apr-21     | 2.9  | 2.3  | 0.6  | n.d. | n.d. |
| S118 | Sep-21     | 2.60 | 2.0  | 0.4  | 6.7  | 26.0 |
| S118 | Jan-22     | 3.0  | 13.0 | 3.7  | 10   | 6.0  |
| S118 | May-22     | 3.0  | 40.7 | 5.5  | 23   | 14   |
| S118 | Sep-22     | 4.0  | 3.6  | 15.5 | 24   | 13   |
| S118 | Jan-23     | 3.1  | 0.5  | 8.2  | 25   | 44   |
| S118 | Jun-23     | 2.6  | 1.6  | 13.8 | 107  | 51   |
| S118 | Sep-23     | 2.5  | 7.4  | 12.4 | 19   | 6.4  |

Table S352: Piezometer S119: concentrations of As, Hg, Sb, Al and Fe (µg/L); n.d. = not determined

| ID   | Month-year | As  | Hg   | Sb   | Al   | Fe   |
|------|------------|-----|------|------|------|------|
| S119 | Jan-14     | 7.9 | 2.3  | 0.2  | n.d. | n.d. |
| S119 | Jan-15     | 6.2 | 0.3  | 0.1  | n.d. | n.d. |
| S119 | May-15     | 5.5 | 3.3  | 0.3  | n.d. | n.d. |
| S119 | Sep-15     | 6.2 | 0.7  | 0.2  | n.d. | n.d. |
| S119 | Jan-16     | 5.8 | 0.6  | 0.2  | n.d. | n.d. |
| S119 | May-16     | 5.6 | 1.8  | 0.4  | n.d. | n.d. |
| S119 | Oct-16     | 6.5 | n.d. | n.d. | n.d. | n.d. |
| S119 | Jan-17     | 7.0 | 1.7  | <0.1 | n.d. | n.d. |
| S119 | May-17     | 6.5 | 1.4  | 0.9  | n.d. | n.d. |
| S119 | Sep-17     | 6.7 | 0.4  | <0.1 | n.d. | n.d. |
| S119 | Jan-18     | 6.2 | 1.2  | 0.4  | n.d. | n.d. |
| S119 | Jun-18     | 5.5 | 1.2  | 0.5  | n.d. | n.d. |
| S119 | Nov-18     | 6.2 | 0.5  | 0.1  | n.d. | n.d. |
| S119 | Mar-19     | 6.3 | 1.8  | 0.1  | n.d. | n.d. |
| S119 | May-19     | 6.0 | 2.2  | 0.3  | n.d. | n.d. |
| S119 | Oct-19     | 6.3 | 1.3  | 0.7  | n.d. | n.d. |
| S119 | Jan-20     | 6.0 | 0.4  | 0.1  | n.d. | n.d. |
| S119 | May-20     | 7.2 | 0.9  | 0.2  | n.d. | n.d. |
| S119 | Oct-20     | 6.8 | 0.5  | 0.2  | n.d. | n.d. |
| S119 | Jan-21     | 6.4 | 0.4  | 0.1  | n.d. | n.d. |
| S119 | Apr-21     | 7.0 | <0.1 | 0.1  | n.d. | n.d. |
| S119 | Sep-21     | 5.6 | 0.3  | 0.2  | 4.4  | 5.9  |
| S119 | Jan-22     | 7.0 | 0.3  | 0.1  | 3.8  | 2.6  |
| S119 | May-22     | 7.8 | 0.4  | 0.1  | 5.5  | 2.6  |
| S119 | Sep-22     | 8.6 | 0.3  | 0.1  | 3.5  | 2.1  |
| S119 | Jan-23     | 6.7 | 0.2  | 0.2  | 11   | 6.7  |
| S119 | Jun-23     | 7.4 | 0.6  | 0.2  | 12   | 1.6  |
| S119 | Sep-23     | 7.3 | <0.1 | 0.1  | 6.8  | 1.8  |

Table S36: Piezometer S120: concentrations of As, Hg, Sb, Al and Fe (µg/L); n.d. = not determined

| ID   | Month-year | As    | Hg         | Sb    | Al   | Fe   |
|------|------------|-------|------------|-------|------|------|
| S120 | Sep-14     | 3.9   | 1.0        | 0.1   | n.d. | n.d. |
| S120 | Jan-15     | 2.0   | 0.5        | < 0.1 | n.d. | n.d. |
| S120 | May-15     | 3.6   | 1.6        | 0.2   | n.d. | n.d. |
| S120 | Sep-15     | 1.7   | 0.7        | 0.2   | n.d. | n.d. |
| S120 | Jan-16     | 1.7   | 0.7        | 0.1   | n.d. | n.d. |
| S120 | May-16     | 2.7   | 0.8        | 0.5   | n.d. | n.d. |
| S120 | Oct-16     | 1.0   | 0.3        | 0.3   | n.d. | n.d. |
| S120 | Jan-17     | 1.0   | 0.4        | 1.9   | n.d. | n.d. |
| S120 | May-17     | 1.2   | 3.6        | 0.6   | n.d. | n.d. |
| S120 | Sep-17     | <0.1  | 1.0        | <0.1  | n.d. | n.d. |
| S120 | Jan-18     | 0.7   | <u>9.1</u> | 1.1   | n.d. | n.d. |
| S120 | Jun-18     | 3.1   | 0.9        | 0.4   | n.d. | n.d. |
| S120 | Nov-18     | 1.0   | 0.6        | <0.1  | n.d. | n.d. |
| S120 | Mar-19     | 1.5   | 1.6        | < 0.1 | n.d. | n.d. |
| S120 | May-19     | < 0.1 | 3.6        | < 0.1 | n.d. | n.d. |
| S120 | Oct-19     | 1.6   | 0.3        | 0.7   | n.d. | n.d. |
| S120 | Jan-20     | 1.2   | 0.6        | < 0.1 | n.d. | n.d. |
| S120 | May-20     | 1.0   | 2.9        | 0.1   | n.d. | n.d. |
| S120 | Oct-20     | 0.7   | 4.5        | 0.1   | n.d. | n.d. |
| S120 | Jan-21     | 0.6   | 0.7        | < 0.1 | n.d. | n.d. |
| S120 | Apr-21     | 1.3   | <0.1       | < 0.1 | n.d. | n.d. |
| S120 | Sep-21     | 0.6   | 0.4        | 0.1   | 1416 | 9.5  |
| S120 | Jan-22     | 0.8   | 0.8        | 0.1   | 1107 | 17   |
| S120 | May-22     | 0.8   | 2.6        | 0.1   | 1434 | 15   |
| S120 | Sep-22     | 0.3   | 1.1        | <0.1  | 1207 | 8.5  |
| S120 | Jan-23     | 0.2   | 0.4        | 0.1   | 1021 | 14   |
| S120 | Jun-23     | 0.2   | 6.3        | 2.2   | 1178 | 7.1  |
| S120 | Sep-23     | 0.1   | <0.1       | 0.1   | 1207 | 112  |

Table S37: Piezometer S124: concentrations of As, Hg, Sb, Al and Fe (µg/L); n.d.= no determined

| ID   | Month-year | As  | Hg    | Sb    | Al   | Fe   |
|------|------------|-----|-------|-------|------|------|
| S124 | Jan-15     | 1.9 | 97.9  | < 0.1 | n.d. | n.d. |
| S124 | May-15     | 1.7 | 111.0 | 0.1   | n.d. | n.d. |
| S124 | Sep-15     | 2.0 | 3.1   | < 0.1 | n.d. | n.d. |
| S124 | Jan-16     | 1.7 | 225.0 | <0.1  | n.d. | n.d. |
| S124 | May-16     | 2.1 | 168.0 | 0.1   | n.d. | n.d. |
| S124 | Oct-16     | 1.8 | 171.0 | n.d.  | n.d. | n.d. |
| S124 | Jan-17     | 1.7 | 161.0 | <0.1  | n.d. | n.d. |
| S124 | May-17     | 1.6 | 235.0 | 0.4   | n.d. | n.d. |
| S124 | Sep-17     | 1.4 | 209.0 | <0.1  | n.d. | n.d. |
| S124 | Jan-18     | 1.8 | 246.0 | 0.3   | n.d. | n.d. |
| S124 | Jun-18     | 1.6 | 197.1 | 0.4   | n.d. | n.d. |
| S124 | Nov-18     | 1.7 | 215.0 | <0.1  | n.d. | n.d. |
| S124 | Mar-19     | 1.7 | 203.0 | < 0.1 | n.d. | n.d. |
| S124 | May-19     | 1.2 | 220.0 | < 0.1 | n.d. | n.d. |
| S124 | Oct-19     | 1.8 | 252.0 | < 0.1 | n.d. | n.d. |
| S124 | Jan-20     | 1.6 | 259.0 | < 0.1 | n.d. | n.d. |
| S124 | May-20     | 1.7 | 274.0 | < 0.1 | n.d. | n.d. |
| S124 | Oct-20     | 1.7 | 231.0 | 0.1   | n.d. | n.d. |
| S124 | Jan-21     | 1.5 | 248.0 | < 0.1 | n.d. | n.d. |
| S124 | Apr-21     | 1.7 | 234.0 | < 0.1 | n.d. | n.d. |
| S124 | Sep-21     | 1.7 | 298.9 | 0.1   | 8.8  | 4.6  |
| S124 | Jan-22     | 2.0 | 263.3 | 0.1   | 8.1  | 8.0  |
| S124 | May-22     | 2.0 | 237.5 | 0.6   | 13   | 5.4  |
| S124 | Sep-22     | 2.1 | 292.8 | 0.1   | 15   | 7.9  |
| S124 | Jan-23     | 0.6 | 240.9 | 17.5  | 0.1  | 0.4  |
| S124 | Jun-23     | 1.9 | 199.7 | 0.1   | 19   | 7.0  |
| S124 | Sep-23     | 2.0 | 140.0 | 0.3   | 17   | 6.1  |

Table S38: Piezometer S128: concentrations of As, Hg, Sb, Al and Fe (µg/L); n.d.= not determined

| ID   | Month-year | As    | Hg  | Sb    | Al   | Fe    |
|------|------------|-------|-----|-------|------|-------|
| S128 | Jan-15     | 1.9   | 0.3 | 0.2   | n.d. | n.d.  |
| S128 | May-15     | 1.2   | 0.7 | 0.1   | n.d. | n.d.  |
| S128 | Sep-15     | 1.6   | 1.6 | 0.1   | n.d. | n.d.  |
| S128 | Jan-16     | 1.1   | 0.1 | <0.1  | n.d. | n.d.  |
| S128 | May-16     | 0.3   | 2.5 | 1.5   | n.d. | n.d.  |
| S128 | Oct-16     | 1.6   | 0.2 | n.d.  | n.d. | n.d.  |
| S128 | Jan-17     | 1.9   | 1.9 | <0.1  | n.d. | n.d.  |
| S128 | Sep-17     | 0.9   | 0.3 | <0.1  | n.d. | n.d.  |
| S128 | Jun-18     | < 0.1 | 0.8 | 0.1   | n.d. | n.d.  |
| S128 | Nov-18     | 2.1   | 0.1 | <0.1  | n.d. | n.d.  |
| S128 | Mar-19     | < 0.1 | 1.1 | < 0.1 | n.d. | n.d.  |
| S128 | May-19     | < 0.1 | 2.1 | 0.1   | n.d. | n.d.  |
| S128 | Oct-19     | 0.6   | 6.7 | < 0.1 | n.d. | n.d.  |
| S128 | Jan-20     | < 0.1 | 0.6 | < 0.1 | n.d. | n.d.  |
| S128 | May-20     | 0.2   | 5.8 | < 0.1 | n.d. | n.d.  |
| S128 | Oct-20     | 1.6   | 0.2 | < 0.1 | n.d. | n.d.  |
| S128 | Jan-21     | 0.1   | 1.4 | < 0.1 | n.d. | n.d.  |
| S128 | Apr-21     | 0.2   | 1.5 | < 0.1 | n.d. | n.d.  |
| S128 | Sep-21     | 1.0   | 0.0 | 0.0   | 7.0  | 10839 |
| S128 | Jan-22     | 1.9   | 0.6 | <0.1  | 38   | 11832 |
| S128 | May-22     | 0.2   | 2.7 | 0.1   | 9.0  | 5256  |
| S128 | Sep-22     | 1.3   | 3.8 | <0.1  | 7.0  | 11268 |
| S128 | Jan-23     | 2.1   | 0.9 | <0.1  | 8.0  | 11164 |
| S128 | Jun-23     | 0.1   | 1.6 | 0.1   | 10   | 16    |
| S128 | Sep-23     | 1.1   | 0.1 | <0.1  | 19   | 6583  |



Table S39: Surface water VIV: concentrations of As, Hg, Sb, Al and Fe (µg/L); n.d.= not determined

| ID  | Month-year | As  | Hg   | Sb  | Al   | Fe   |
|-----|------------|-----|------|-----|------|------|
| VIV | Sep-17     | 3.9 | 0.2  | 1.0 | n.d. | n.d. |
| VIV | Jan-18     | 3.0 | 0.3  | 0.8 | n.d. | n.d. |
| VIV | Jun-18     | 2.8 | 1.1  | 1.0 | n.d. | n.d. |
| VIV | Nov-18     | 2.1 | 0.2  | 0.4 | n.d. | n.d. |
| VIV | Mar-19     | 2.6 | <0.1 | 0.3 | n.d. | n.d. |
| VIV | May-19     | 2.0 | <0.1 | 0.4 | n.d. | n.d. |
| VIV | Oct-19     | 2.9 | 0.6  | 0.5 | n.d. | n.d. |
| VIV | Jan-20     | 1.8 | 0.3  | 0.6 | n.d. | n.d. |
| VIV | May-20     | 3.7 | 2.5  | 0.4 | n.d. | n.d. |
| VIV | Oct-20     | 3.3 | <0.1 | 0.5 | n.d. | n.d. |
| VIV | Jan-21     | 2.1 | 0.6  | 0.5 | n.d. | n.d. |
| VIV | Apr-21     | 2.9 | 0.3  | 0.4 | n.d. | n.d. |
| VIV | Sep-21     | 4.3 | 0.2  | 0.6 | 23   | 83   |
| VIV | Jan-22     | 3.3 | 0.1  | 0.8 | 13   | 39   |
| VIV | May-22     | 5.2 | 0.2  | 0.8 | 21   | 113  |
| VIV | Sep-22     | 4.9 | 0.7  | 1.0 | 21   | 45   |
| VIV | Jan-23     | 3.0 | 0.9  | 0.6 | 96   | 98   |
| VIV | Jun-23     | 3.3 | 0.7  | 1.2 | 45   | 22   |
| VIV | Sep-23     | 3.4 | <0.1 | 0.8 | 39   | 57   |

Table S40: Surface water VAL: concentrations of As, Hg, Sb, Al and Fe (µg/L); n.d.= no determined

| ID   | Month-year | As  | Hg   | Sb   | Al   | Fe   |
|------|------------|-----|------|------|------|------|
| VALL | Jan-17     | 2.0 | 2.0  | <0.1 | n.d. | n.d. |
| VAL  | May-17     | 7.8 | 0.1  | 0.4  | n.d. | n.d. |
| VAL  | Sep-17     | 6.0 | 0.2  | 0.3  | n.d. | n.d. |
| VAL  | Jun-18     | 2.0 | 0.1  | 1.4  | n.d. | n.d. |
| VAL  | Jun-18     | 1.9 | 0.1  | 0.6  | n.d. | n.d. |
| VAL  | Nov-18     | 8.1 | <0.1 | 1.4  | n.d. | n.d. |
| VAL  | Mar-19     | 1.6 | 1.8  | 0.4  | n.d. | n.d. |
| VAL  | May-19     | 1.2 | 1.7  | 1.4  | n.d. | n.d. |
| VAL  | Oct-19     | 4.3 | 2.5  | 0.7  | n.d. | n.d. |
| VAL  | Jan-20     | 2.1 | 2.1  | 0.5  | n.d. | n.d. |
| VAL  | May-20     | 2.7 | 2.3  | 0.4  | n.d. | n.d. |
| VAL  | Oct-20     | 3.4 | 0.5  | 0.6  | n.d. | n.d. |
| VAL  | Jan-21     | 1.9 | 2.2  | 0.4  | n.d. | n.d. |
| VAL  | Apr-21     | 2.7 | <0.1 | 0.4  | n.d. | n.d. |
| VAL  | Sep-21     | 7.4 | 0.5  | 0.37 | 27   | 71   |
| VAL  | Jan-22     | 3.1 | 0.9  | 0.6  | 33   | 39   |
| VAL  | May-22     | 2.0 | 0.8  | 0.6  | 13   | 5.4  |
| VAL  | Sep-22     | 4.8 | 0.6  | 0.8  | 14   | 31   |
| VAL  | Jan-23     | 2.5 | 1.1  | 0.9  | 41   | 63   |
| VAL  | Jun-23     | 2.3 | 0.9  | 1.4  | 35   | 102  |
| VAL  | Sep-23     | 3.0 | <0.1 | 0.5  | 65   | 27   |

Table S41: Surface water GRN: concentrations of As, Hg, Sb, Al and Fe (µg/L); in. n.d. = not determined

| ID  | Month-year | As  | Hg   | Sb   | Al   | Fe   |
|-----|------------|-----|------|------|------|------|
| GRN | Sep-14     | 2   | 0.4  | 0.3  | n.d. | n.d. |
| GRN | Jan-15     | 1.2 | 0.07 | 0.2  | n.d. | n.d. |
| GRN | May-15     | 1.4 | 0.9  | 0.3  | n.d. | n.d. |
| GRN | Sep-15     | 2.3 | <0.1 | 0.3  | n.d. | n.d. |
| GRN | Jan-16     | 1.1 | 0.4  | 0.3  | n.d. | n.d. |
| GRN | May-16     | 1.8 | <0.1 | 1.2  | n.d. | n.d. |
| GRN | Oct-16     | 2.0 | 0.1  | 0.2  | n.d. | n.d. |
| GRN | Jan-17     | 1.1 | 1.4  | <0.1 | n.d. | n.d. |
| GRN | May-17     | 1.7 | 0.2  | 0.6  | n.d. | n.d. |
| GRN | Sep-17     | 2   | 1    | 0.5  | n.d. | n.d. |
| GRN | Jan-18     | 1.2 | 0.1  | 0.8  | n.d. | n.d. |
| GRN | Jun-18     | 1.6 | 0.2  | 0.6  | n.d. | n.d. |
| GRN | Nov-18     | 1.2 | <0.1 | 0.3  | n.d. | n.d. |
| GRN | Mar-19     | 0.9 | <0.1 | 0.4  | n.d. | n.d. |
| GRN | May-19     | 0.9 | <0.1 | 0.4  | n.d. | n.d. |
| GRN | Oct-19     | 3.8 | 0.3  | 0.4  | n.d. | n.d. |
| GRN | Jan-20     | 1.2 | 0.2  | 0.3  | n.d. | n.d. |
| GRN | May-20     | 2.1 | 1.2  | 0.4  | n.d. | n.d. |
| GRN | Oct-20     | 2.3 | 0.1  | 0.3  | n.d. | n.d. |
| GRN | Jan-21     | 1   | 5.6  | 0.4  | n.d. | n.d. |
| GRN | Apr-21     | 1.2 | <0.1 | 0.3  | n.d. | n.d. |
| GRN | Sep-21     | 2.5 | 0.1  | 0.2  | 8.6  | 79   |
| GRN | Jan-22     | 1.3 | 0.2  | 0.4  | 13   | 79   |
| GRN | May-22     | 2.4 | 26.4 | 0.5  | 15   | 96   |
| GRN | Sep-22     | 3.1 | 0.2  | 0.7  | 14   | 58   |
| GRN | Jan-23     | 1.1 | 0.2  | 0.2  | 6.6  | 2.7  |
| GRN | Jun-23     | 2.1 | 0.2  | 0.5  | 30   | 212  |
| GRN | Sep-23     | 2.3 | n.d. | 0.3  | 17   | 59   |

Table S42: Spring SR8: concentrations of As, Hg, Sb, Al and Fe (µg/L); n.d. = not determined

| ID  | Month-years | As  | Hg   | Sb   | Al   | Fe   |
|-----|-------------|-----|------|------|------|------|
| SR8 | Sep-14      | 5.3 | 0.8  | 0.3  | n.d. | n.d. |
| SR8 | Jan-15      | 4.9 | 1.5  | 0.2  | n.d. | n.d. |
| SR8 | May-15      | 4.1 | 5.4  | 0.3  | n.d. | n.d. |
| SR8 | Sep-15      | 4.5 | 0.8  | 0.1  | n.d. | n.d. |
| SR8 | May-16      | 2.3 | 3.5  | 0.5  | n.d. | n.d. |
| SR8 | Oct-16      | 4.2 | 0.4  | 0.2  | n.d. | n.d. |
| SR8 | Jan-17      | 3.8 | 1.7  | <0.1 | n.d. | n.d. |
| SR8 | May-17      | 3.0 | 0.7  | 0.3  | n.d. | n.d. |
| SR8 | Sep-17      | 6.0 | 0.9  | 0.3  | n.d. | n.d. |
| SR8 | Jan-18      | 3.4 | 1.0  | 1.6  | n.d. | n.d. |
| SR8 | Jun-18      | 1.6 | 0.1  | 0.2  | n.d. | n.d. |
| SR8 | Nov-18      | 2.9 | 0.8  | 0.2  | n.d. | n.d. |
| SR8 | Mar-19      | 2.0 | 1.1  | 0.2  | n.d. | n.d. |
| SR8 | May-19      | 1.6 | 1.8  | 0.3  | n.d. | n.d. |
| SR8 | Oct-19      | 4.5 | 3.5  | 0.2  | n.d. | n.d. |
| SR8 | Jan-20      | 4.9 | 10.2 | 0.4  | n.d. | n.d. |
| SR8 | May-20      | 3.3 | 5.0  | 0.2  | n.d. | n.d. |
| SR8 | Oct-20      | 5.8 | 4.1  | 0.4  | n.d. | n.d. |
| SR8 | Jan-21      | 2.9 | 9.5  | 0.5  | n.d. | n.d. |
| SR8 | Apr-21      | 4.1 | 3.7  | 0.1  | n.d. | n.d. |
| SR8 | Sep-21      | 6.6 | 0.7  | 0.7  | 28   | 71   |
| SR8 | Jan-22      | 5.9 | 1.2  | 0.2  | 64   | 14   |
| SR8 | May-22      | 6.8 | 1.7  | 0.2  | 16   | 15   |
| SR8 | Sep-22      | 4.7 | 2.6  | 0.5  | 35   | 45   |
| SR8 | Jan-23      | 4.5 | 2.9  | 0.7  | 53   | 138  |
| SR8 | Jun-23      | 2.4 | 3.4  | 1.8  | 33   | 4.1  |
| SR8 | Sep-23      | 1.5 | 6.3  | 0.7  | 24   | 11   |

Table S43: Spring SR10A: concentrations of As, Hg, Sb, Al and Fe (µg/L); n.d.=not determined

| ID    | Month-years | As  | Hg   | Sb    | Al   | Fe   |
|-------|-------------|-----|------|-------|------|------|
| SR10A | Sep-14      | 2.3 | 23.7 | 0.1   | n.d. | n.d. |
| SR10A | Jan-15      | 2.2 | 16.2 | < 0.1 | n.d. | n.d. |
| SR10A | May-15      | 2.0 | 19.7 | 0.1   | n.d. | n.d. |
| SR10A | Sep-15      | 2.1 | 28.6 | 0.1   | n.d. | n.d. |
| SR10A | Jan-16      | 1.9 | 16.0 | <0.1  | n.d. | n.d. |
| SR10A | May-16      | 2.1 | 18.2 | 0.2   | n.d. | n.d. |
| SR10A | Oct-16      | 2.0 | 10.1 | < 0.1 | n.d. | n.d. |
| SR10A | Jan-17      | 1.9 | 9.6  | <0.1  | n.d. | n.d. |
| SR10A | May-17      | 2.0 | 8.4  | 0.2   | n.d. | n.d. |
| SR10A | Sep-17      | 1.9 | 3.6  | <0.1  | n.d. | n.d. |
| SR10A | Jan-18      | 2.4 | 5.2  | 0.9   | n.d. | n.d. |
| SR10A | Jun-18      | 1.7 | 7.2  | 0.2   | n.d. | n.d. |
| SR10A | Nov-18      | 2.0 | 12.2 | 0.1   | n.d. | n.d. |
| SR10A | Mar-19      | 1.9 | 11.6 | 0.1   | n.d. | n.d. |
| SR10A | May-19      | 1.5 | 8.4  | 0.1   | n.d. | n.d. |
| SR10A | Oct-19      | 2.2 | 13.1 | 0.1   | n.d. | n.d. |
| SR10A | Jan-20      | 1.8 | 14.3 | 0.1   | n.d. | n.d. |
| SR10A | May-20      | 2.1 | 19.5 | 0.1   | n.d. | n.d. |
| SR10A | Oct-20      | 2.1 | 12.2 | 0.1   | n.d. | n.d. |
| SR10A | Jan-21      | 1.7 | 9.7  | 0.1   | n.d. | n.d. |
| SR10A | Apr-21      | 1.9 | 21.5 | < 0.1 | n.d. | n.d. |
| SR10A | Sep-21      | 2.2 | 15.7 | <0.1  | 19   | 2.4  |
| SR10A | Jan-22      | 2.6 | 11.9 | 0.1   | 49   | 13   |
| SR10A | May-22      | 2.5 | 8.7  | 0.1   | 28   | 7.5  |
| SR10A | Sep-22      | 2.9 | 11.1 | <0.1  | 12   | 2.6  |
| SR10A | Jan-23      | 2.5 | 10.1 | 0.1   | 16   | 3.1  |
| SR10A | Jun-23      | 2.3 | 10.2 | 0.1   | 25   | 4.8  |
| SR10A | Sep-23      | 2.3 | 5.0  | 0.1   | 18   | 1.6  |

Table S44: Surface water GIT: concentrations of As, Hg, Sb, Al and Fe (µg/L); n.d.=no determined

| ID  | Month-year | As   | Hg    | Sb    | Al   | Fe    |
|-----|------------|------|-------|-------|------|-------|
| GIT | Jan-13     | 11.1 | <0.1  | <0.1  | 409  | 10060 |
| GIT | May-13     | 10.7 | < 0.1 | 0.5   | 149  | 13560 |
| GIT | Feb-14     | 7.0  | <0.1  | <0.1  | 183  | 12050 |
| GIT | Sep-14     | 9.0  | <0.1  | <0.1  | 346  | 15000 |
| GIT | Apr-15     | 8.0  | <0.1  | <0.1  | 413  | 14861 |
| GIT | Oct-15     | 10.1 | <0.1  | <0.1  | 323  | 20290 |
| GIT | May-16     | 7.8  | <0.1  | 0.6   | 346  | 32100 |
| GIT | Oct-16     | 12.1 | 0.2   | n.d.  | 346  | 32100 |
| GIT | Apr-17     | 8.5  | 0.4   | <0.1  | n.d. | n.d.  |
| GIT | Jun-18     | 11.0 | < 0.1 | 0.3   | 270  | 18270 |
| GIT | mar-19     | 8.5  | <0.1  | <0.1  | n.d. | n.d.  |
| GIT | Oct-19     | 11.0 | 0.4   | <0.1  | n.d. | n.d.  |
| GIT | Jan-20     | 10.8 | 0.2   | < 0.1 | 396  | 5876  |
| GIT | May-20     | 11.2 | 2.2   | < 0.1 | n.d. | n.d.  |
| GIT | Oct-20     | 7.8  | 1.0   | < 0.1 | n.d. | n.d.  |
| GIT | Apr-21     | 8.8  | 0.2   | < 0.1 | n.d. | n.d.  |
| GIT | Sept-21    | 11.3 | < 0.1 | < 0.1 | n.d. | n.d.  |
| GIT | Dic-21     | 7.6  | 0.1   | < 0.1 | 364  | 17581 |
| GIT | Jan-22     | n.d. | n.d.  | n.d.  | n.d. | n.d.  |
| GIT | Mag-22     | 7.6  | <0.1  | <0.1  | 364  | 17582 |
| GIT | Sep-22     | 9.5  | 0.1   | <0.1  | 364  | 17751 |
| GIT | Jan-23     | 9.3  | 0.051 | <0.1  | 346  | 17643 |
| GIT | May-23     | 9.6  | 0.51  | <0.1  | 6596 | 18407 |
| GIT | Jun-23     | 9.7  | <0.1  | <0.1  | 403  | 21730 |
| GIT | Sep-23     | 8.6  | 0.007 | 0.2   | 312  | 19921 |
